# Supplementary material
Source: PubMed Central journal article supplement (PMC7116273)
Supplement: EMS98798-supplement-Supplementary_Materials.pdf [file EMS98798-supplement-Supplementary_Materials.pdf]

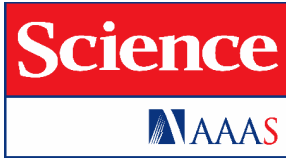

## Supplementary Materials for

### The evolutionary history of dogs in the Americas

Máire Ní Leathlobhair\*, Angela R. Perri\*, Evan K. Irving-Pease\*, Kelsey E. Witt\*, Anna Linderholm\*, James Haile, Ophelie Lebrasseur, Carly Ameen, Jeffrey Blick†, Adam R. Boyko, Selina Brace, Yahaira Nunes Cortes, Susan J. Crockford, Alison Devault, Evangelos A. Dimopoulos, Morley Eldridge, Jacob Enk, Shyam Gopalakrishnan, Kevin Gori, Vaughan Grimes, Eric Guiry, Anders J. Hansen, Ardern Hulme-Beaman, John Johnson, Andrew Kitchen, Aleksei K. Kasparov, Young-Mi Kwon, Pavel A. Nikolskiy, Carlos Peraza Lope, Aurélie Manin, Terrance Martin, Michael Meyer, Kelsey Noack Myers, Mark Omura, Jean-Marie Rouillard, Elena Y. Pavlova, Paul Sciulli, Mikkel-Holger S. Sinding, Andrea Strakova, Varvara V. Ivanova, Christopher Widga, Eske Willerslev, Vladimir V. Pitulko, Ian Barnes, M. Thomas P. Gilbert, Keith M. Dobney, Ripan S. Malhi, Elizabeth P. Murchison‡§, Greger Larson‡§, Laurent A. F. Frantz‡§

\*These authors contributed equally to this work.

†Deceased.

‡These authors cosupervised this work.

§Corresponding author. Email: laurent.frantz@arch.ox.ac.uk (L.A.F.F.); greger.larson@arch.ox.ac.uk (G.L.); epm27@cam.ac.uk (E.P.M.)

Published 6 July 2018, *Science* **361**, 81 (2018)

DOI: 10.1126/science.aao4776

#### This PDF file includes:

Materials and Methods  
Figs. S1 to S27  
Tables S3 to S8 and S12 to S16  
Captions for Tables S1, S2, and S9 to S11  
References

#### Other Supplementary Material for this manuscript includes the following:

(available at [www.sciencemag.org/content/361/6397/81/suppl/DC1](http://www.sciencemag.org/content/361/6397/81/suppl/DC1))

Tables S1, S2, and S9 to S11

## Materials and Methods

### Archaeological Site Descriptions

Here we describe all sites associated with pre-contact samples that were used in the analysis (see Table S1 and Fig 1a for more information). We include the sample number(s) assigned by the home depository along with our study sample number(s) (e.g., depository; sample). Where only one set of numbers is given the depository number and sample number are the same.

#### *Aachim Lighthouse (AM1, AM2; CGG10, CGG11)*

The Aachim Lighthouse site is located on the Aachim Peninsula on the Eastern Siberian Sea coast. This site has the remains of sea mammals and stone tools, as well as the mandibles of two dogs that have been radiocarbon dated to 1,700 BP (27).

#### *Angel Mounds (AM310A, AM310B, AM310C, AM474; FS3305, FS3283.33, FS3283.22, FS2187)*

Angel Mounds is located along the Ohio River just east of present day Evansville, Indiana. The site consists of eleven mounds, several plazas, and numerous residential neighborhoods surrounded by a large semi-circular palisade (28). More recent research suggests that site construction began just before AD 1050 and continued through AD 1450 with the primary occupation occurring during the Late Mississippian period between AD 1350-1450 (29). Extensive excavations were conducted at Angel Mounds, from the WPA era in the late 1930's through the 1960's, and several dog burials and dog skulls are recorded from excavations. Of the four dog burials listed in the Angel Mounds catalog, only one contains an articulated dog skeleton that can be considered an intentional and undisturbed dog burial. This dog, FS 3305 (AM310A), was photographed during WPA excavations and was recovered from the block known as X11B. There are also the remains of two dogs (which are mixed in the same context) recorded as "dog burial", FS 3283.33 (AM310B) and FS 3283.22 (AM310C), which comes from the same excavation block as the articulated dog; and FS 2187 (AM474), which comes from block W11A. These second and third "burials" consist of several disarticulated bone fragments representing incomplete remains, and do not have any hand-drawn or photographed in situ representations associated with them. FS 3283 includes a smaller dog's cranial and mandibular fragments (partially burned) as well as a large dog's limb bones and postcranial elements. Materials associated with FS 2187 include the cranium, without mandibles or postcranial elements, of what is an average-sized Mississippian dog along with the shaft portion of a single right humerus from a sandhill crane (*Grus canadensis*) from context W11A.

#### *Anker (ISM21C; AL2705)*

The Anker site (IAS CK 21) is a Mississippian village site on the north side of the Little Calumet River, just south of Chicago (30). Part of the site was destroyed from previous construction efforts, but a dome-shaped house, fire pits, storage pits, and more than 30 human burials were identified. The individuals interred at this site were likely wealthy, as they were buried with numerous grave goods, including animal skulls and copper pieces. The pottery that has been recovered is fairly homogenous, all jars in the

Oneonta style, which suggests that this site dates to AD 1400–1500. A small number of *Canis* bones were recovered from the site, including some dog teeth that were used as grave goods. The Anker sample included in this study was morphologically identified as *Canis lupus*.

*Apple Creek (ISM070; AL2707)*

The Apple Creek site is a Woodland village on the north bank of Apple Creek, four miles north of Eldred, IL (30). The site was excavated in 1962 and 1963, and has cultural components from the Hopewell and Woodland periods. The majority of faunal bones recovered from the site were white-tailed deer (*Odocoileus virginianus*), suggesting that they were an important food source for the area (31). Seven dog burials have been recovered from the site, as well as some additional isolated elements, which show evidence of consumption. The dog burials are likely from the Middle or Late Woodland periods (2,000-1,000 BP). The dogs are all terrier-sized, which is smaller on average than most other Woodland dogs. The dog used in this analysis, Burial 1, was a small mature male dog with more tooth wear on the right side of the maxilla and mandible than the left.

*Baum, Ohio (OSU\_13320; AL2748)*

The Baum site is a prehistoric village settlement in Paint Creek River Valley, Ross County, Ohio. This is the type site for the Baum Phase of the Fort Ancient culture, dating between AD 950-1200 (32, 33). The village extends over 10 acres of ground, and consists of dozens of circular post structures 3-4 meters in diameter, surrounding a large central mound (34, 35). The mound has been known since the mid-19<sup>th</sup> century, and is interpreted as a large ceremonial pyramid structure with two levels, containing 17 human burials (32, 34, 36), and is perhaps the best-preserved mound in the region. In three seasons of excavations covering 2 acres, Mills uncovered 47 tepee structures, 127 burials, and 234 refuse pits, concluding that the site was occupied year-round by a minimum of several hundred occupants (34).

Abundant, well preserved faunal remains were found at the site within the refuse pits, and remains of domestic dogs were found ubiquitously throughout the village. These remains were described, in the early 20<sup>th</sup> century, by A.F. Lucas as belonging to Indian dogs of a size and proportion similar to the bull terrier (34). A total of 50 dog remains, including 7 crania, were collected. Some of the bones had evidence of cut marks, while others were broken consistent with other prey species, and some were made into ornaments. All crania collected were broken, which Mills suggested was to remove the brain (34). Comparisons with other prehistoric dogs suggest these were of the general Indian dog type found at contemporary sites in the region, as well as at prehistoric sites in Texas, and the old Pueblos (34, 37).

While individual dog burials and associated ritual activity are known from contemporary sites at the time (e.g., (38, 39) the evidence from Baum suggests a more domestic role for these dogs. The breakage of dog bones similar to other food animals indicates that at least on some occasions dogs were used as food. Gnaw marks from dogs on other animal bones found throughout the middens suggests that dogs had access to food waste. Unlike earlier Archaic period sites where dogs were regularly afforded

special treatment indicated by their careful burial, these later prehistoric dogs from Baum appear to have been a utilitarian presence at the site, likely similar to modern feral or village dogs, with deposition predominantly occurring in refuse pits.

*Cox (1Jo176-66-6; Cox6)*

The Cox mound is located in Jackson County, Alabama, and had a number of flint tools and pot sherds associated with the mound (40). The site dates to the Middle Woodland period (1-500 AD). To the east of the mound, there were thirty human burials, many of which included grave goods such as shell beads and tempered bowls. Multiple dogs have also been recovered from the site, one of which is included in this analysis.

*Channel Islands (CA-SNI-4, CA-SNI-21 133.21-A, CA-SNI-21 133.21-7, CA-SBA-27 F.492, CA-SRI-41, CAW2, CAO1; CISNI4, CINHA, CINH7, CIAS, CICVD, CAW2, CAO1)*

The Channel Islands are 20 to 98 km from the coast of Southern California, and have been occupied for 13,000 years (41). The peoples living on the island had a primarily marine diet and complex trade networks both between islands and with the mainland. Dogs have lived on the island for at least 6,000 years, and were almost certainly brought over by humans (42). They were likely not used as hunters, but may have been an occasional food source, and were found on all of the Channel Islands. Seven individuals from three islands, as well as one mainland archaeological site, have been used in this study. Two dogs were recovered from Santa Cruz Island, one from the Orizaba Cove area (SCRI-434) that dates to the Late Holocene, and the other from Willows Canyon. Three dogs are from San Nicolas Island, two of which come from the North Head site (SNI-21), which was occupied during the Terminal Early Period (5,000 BP) and the Middle Period (2,000 BP). The third dog is from site SNI-4, although its age is uncertain. One dog derives from Santa Rosa Island, at the Canada Verde site (CA-SRI-41), which dates to the terminal Early Period (4,000 BP). The dog from the mainland was recovered from the coastal Chumash town of Syuxtun, which is now a part of modern-day Santa Barbara, and was important both for trade and for interactions between mainland populations and the people from Santa Cruz Island.

*Flint River (1Mo48 – 40-11; FR11)*

The Flint River site was a village with a large circular shell mound (2 m tall, 15 m in diameter) located on the Flint River near Courtland, Alabama (40). The mound is made of raw clay, with a large shell deposit. Over 200 human burials have been recovered from the site, as well as 19 dog burials (43). Dogs were interred throughout the period of occupation, and did not share graves with humans. Large numbers of artifacts were also recovered from the mound, including pottery and sandstone bowls, pipes, awls, and other tools. The majority of the components are from the Late Archaic period, however intrusive Mississippian human burials have also been recovered from the mound (44). The dog analyzed in this study may be Late Archaic or Mississippian.

*Grass Mesa (5MT23-16; 5MT316)*

Grass Mesa Village was a large village located east of the Dolores River in Colorado (45). It was occupied from AD 700 to the early 900s AD, and has one of the highest

artifact densities of any archaeological site in the Mesa Verde region, with a large ceramic assemblage spanning the whole length of human occupation. The earliest period of occupation consisted of dispersed homesteads clustered around pit structures, while later periods of occupation (starting around AD 760) saw the construction of a great kiva, as well as room blocks and more closely-spaced residential structures. Grass Mesa Village had its height of occupation (roughly 150 households) around AD 850, although areas of the village began to be abandoned not long after. The majority of faunal remains from the site were of multiple species of deer and rabbits, although there were also small numbers of dog and unidentifiable *Canis spp.* bones.

*Janey B. Goode, Illinois (11S1232 98-1, 11S1232 34-2, 11S1232 1671-1, 11S1232 845-1, 11S1232 939-1, 11S1232 2601-1, 11S1232 1724-1, 11S1232 4109-2, 11S1232 2793-2, 11S1232 5267-1, 11S1232 5819-1, 11S1232 6287-1, 11S1232 7023-1, 11S1232 7892-1, 11S1232 F9 PP4407-1, 11S1232 I15 PP4747-1, 11S1232 L17 P 2-1, 11S1232 3993-2, 11S1232 Q25 PP4811-1; JBG1M, JBG5, JBG11, JBG12, JBG13, JBG17, JBG19, JBG21, JBG24, JBG26, JBG32, JBG35, JBG37, JBG41, JBG42, JBG43, JBG45, JBG48, JBG50)*

The Janey B. Goode site (11S1232) is a settlement near Brooklyn, Illinois, that was occupied from AD 650 to 1400 and was excavated from 1998 to 2004 (46). This site includes a small Late Woodland component (AD 650-900), and is primarily composed of Terminal Late Woodland period features (AD 900-1050), which include storage pits and structures that were likely houses. A small Mississippian component (AD 1050-1400) has also been identified, and this site is only 8 km from Cahokia, the largest Mississippian mound site as well as the center of the Mississippian world. Interestingly, Janey B. Goode also has one of the largest numbers of dog burials of any archaeological site – dogs have been recovered from 102 different features (47). The majority of these dogs have been recovered from the Terminal Late Woodland component. Many of these dogs were recovered as complete skeletons, and were found in storage pits or buried under the settlement structures. A small number of individuals may have been ritually sacrificed – six males were buried without skulls, suggesting they were beheaded prior to their burial. Cut marks on a Mississippian dog indicate that dogs may have been consumed during the Mississippian period, but dogs from the Late Woodland and Terminal Late Woodland periods show no evidence of consumption, but instead have vertebral fractures, which may be suggestive of their use as pack animals prior to the Mississippian period.

*Koster, Illinois (ISM\_F2256A; AL2135)*

The Koster site is a complex, highly-stratified site located in a tributary valley of the lower Illinois River in west-central Illinois, excavated between 1969 and 1978 by the Foundation for Illinois Archaeology, Northwestern University and the Center for American Archeology (48–51). Cultural deposits dated from the early Archaic through Mississippian periods are buried to depths of over 10m, providing a continuous record of Holocene human occupation in the region (52, 53). Given this record, the Koster site has become a valuable resource for investigating changes in the environment, settlement patterns, technology, and human adaptations to climatic and social variation (53–55); see (56) for overview).

The early Archaic layers at Koster (Horizons 11 and 12), dating from c. 9,900-9,000 calibrated BP (57), are some of the most well-studied, revealing dense layers of habitation, artifacts, middens, and hearths. Horizon 11 also included the burial of nine humans, four infants and five adults ((53), outside of the living area. Excavators also discovered the burial of four dogs, found as complete, articulated skeletons in shallow pits (58, 59). At the time of excavation the dogs were dated based on associated material to around 8,500 years ago, making them the oldest examples of intentional dog burials in the world and some of the oldest domesticated dogs ever identified; certainly the earliest in the New World. Our recent direct dating of two of the Koster dog burials (ISM\_F2256A and ISM\_F2357) dated them to between 10,130-9,680 calibrated BP respectively (2), making them among the earliest dated material from Koster and confirming their position as the earliest identified domesticated dogs in the Americas and the earliest dog burials in the world.

One of the specimen included in this study (ISM\_F2256A; AL2135) was found in a shallow, basin-shaped pit with a metate and mano placed near its cranium, though it is not clear whether this is associated with the burial. The skeleton is complete and the animal was buried lying on its side, with no evidence of intentional cut marks or other trauma. Given the presence of preserved bacula in the other dogs, the missing baculum here suggests the dog was a female, and it was an adult (58). Morey and Wiant (58):225-226) previously discussed the confirmed status of the Koster canids as domesticated dogs based on comparisons to modern and ancient wolves and coyotes, due to their small size. Particularly, they noted the wide palate and cranial vault of this specimen in comparison to coyotes, a finding that seem to be corroborated by our genetic analyses (see below).

#### *Little Bear (CT8 D-2 2-90; LB2)*

The Little Bear Creek site is an Archaic shell mound located at the mouth of the Little Bear Creek, in Colbert County, Alabama (60). The mound contained nearly 200 burials, some of which were cremated or interred with grave goods including shell beads. Other artifacts recovered from the mound include shell-tempered pottery and flint knives and projectile points. The dog remains from this site are all from the Late Archaic period, and were deliberately buried in the mound, similar to the human interments, but dogs and humans were not found buried together at this site (61).

#### *Mayapan (M2: Q152 bag 1, M3: Q152 bag 1, M4: Q152 bag 1, M10: Q162 bag 4; May2, May3, May4, May10)*

Mayapan was the largest Mayan city during the Postclassic period, and was occupied from its founding at 900 BP until its abandonment at 450 BP ((62). It is located in Yucatan, Mexico, and consisted of a monumental center containing temples and ritual buildings, surrounded by residential areas which contained both palaces for the elite and smaller houselots (63). Dog remains were highly concentrated in the Templo Redondo Group, located in the main plaza of the monumental center (Masson and Lope 2013). Over 2,000 dog bone fragments have been identified from the site (64). Young dogs were consumed regularly, and older dogs were often used in ritual contexts.

*McPhee Pueblo (5MT4475-20; 5MT520)*

McPhee Pueblo was part of McPhee Village, which is located 6 km northwest of Dolores, Colorado (65). It was occupied for 200 years during the Pueblo I and II periods (roughly AD 800-980). The pueblo consisted of housing clusters with both living and storage areas, clustered in groups with pit structures. McPhee Pueblo was the largest pueblo in the village at its height of occupation (AD 870-900), and was also the only part of the village to be occupied for the full range of occupation. Over 200 bones have been recovered from the site that are identified as *Canis spp.*, including coyotes, wolves, and dogs.

*Modoc (ISML50, ISM090; AL2810, AL2706)*

The Modoc Rock Shelter is at the edge of the Mississippi floodplain, located 2 miles SE of Prairie du Rocher, IL, and is one of the earliest sites of human occupation in Illinois (66). The lowest strata has been dated to 11,000-9,000 BP, and the site was occupied for 6,000 years. In the earliest strata, tools and projectile points are primarily all that has been recovered, but slightly later in time fire pits have been identified as well. Trash piles of vertebrate remains suggests that the individuals living in the rock shelter were hunters, and also ate large numbers of gastropods. Post molds have been identified starting at 8,000 BP, along with six human burials, but there is no trace of human occupation after 4,000 BP. Two complete dog burials were recovered from the same strata as the human burials (67).

*Perry (1Lu25-Dog 35, 1Lu25-Dog 39, 1Lu25-Dog59; P35, P39, P59)*

The Perry site is a large shell mound located in northern Alabama, on the Tennessee River (68). The shell mound contains hundreds of human burials that have been dated to the middle Archaic to Mississippian periods, based on the artifacts present with the burials, as well as a large assemblage of stone tools (69). Over 100 dogs have also been buried in the shell mound, some of them with humans. The age of these dog burials are largely unknown, as the majority of the dogs were buried without associated grave goods.

*Port au Choix, Newfoundland (MU\_NP50A\_1; AL3194)*

The Port au Choix site is located on Newfoundland's northwest coast on the Port au Choix peninsula, projecting into the confluence of the Gulf of St. Lawrence and the Strait of Belle Isle. The area encompasses a number of well-preserved localities, including a Maritime Archaic burial ground (Port au Choix-3) with over 100 preserved burials (Port au Choix-3, Locus II), excavated from 1967-1969 by Memorial University of Newfoundland (70-72). The Maritime Archaic are defined as native groups in the Atlantic Provinces, dating from approximately 9,000-3,500 years ago, who were well-adapted to a coastal environment (70, 73). The burial ground at Port au Choix is thought to date to approximately 4,400-3,300 years ago (74).

The remains of four dogs were recovered from the Port au Choix-3 burial ground (for review see (75) – two complete and articulated associated burials (c.f. (76) accompanying human Burial 50 (Locus II), fragments of one dog from Locus I, and another from burial fill at Locus II (72). All the dogs appear to be of the Large or Common Indian dog size (c.f. (77):459), though there is some variation between them

which is within the range of sexual dimorphism (72). The dog analyzed here (MU\_MP50A\_1, AL3194) is an older male, likely weighing between 45-55 pounds, killed by a blow to the head, and included, along with another male dog, in a multi-human burial (72): 77-78). Direct radiocarbon dating of the dog resulted in a date of 4,402-3,912 calibrated BP (UCIAMS159456), indicating it comes from the earliest use of the burial ground within the Maritime Archaic period. Tuck ((72):78) proposed these dogs were likely used as companions, hunting aids, and occasionally as travois dogs due to their well-developed muscle attachments. Comparisons to Eskimo sled dogs were unfavorable, but the Port au Choix specimens were similar to other large breed native dogs seen at the prehistoric site of Frontenac Island, New York (78). Early descriptions of large breed native dogs described them as slender and wolf-like, with large erect ears and a long, pointed snout (77):461).

*Prince Rupert Harbour (D1-184, D9-985, D10-973, W5-74, W8-969; PRD1, PRD9, PRD10, PRW5, PRW89)*

Prince Rupert Harbour is on the northern Northwest Coast of North America, just south of the Alaskan boundary. Two sites, GbTo-13 and GbTo-54, had large-scale excavations in 2012-2013 (79). The work used a novel method of electronic data collection where virtually all data was spatially linked to real-world coordinates (80). The larger excavation, at GbTo-54, had nearly 500 m<sup>3</sup> excavated. The oldest component here dates from 900 BC (calibrated radiocarbon) to about 250 BC; the main occupation was between 250 BC and AD 800; and there was a slightly less intensive occupation from about AD 900 to 1300. Some late pre-contact activity also occurred, but there were no European trade goods, suggesting no admixture with European dogs likely occurred in the population of dogs at this site (also suggested by our mtDNA analysis; see below).

GbTo-13 had smaller an occupation limited to AD 1000–1300.

Both sites were remarkable for the large numbers of exotic and high-prestige artifacts and animal bones found. These latter include an unprecedented amount of mountain goat (81) as well as grizzly and black bear, sea lion, northern fur seal, wolf, and other species otherwise rare in Northwest Coast assemblages. The mammal NISP was 5,810 for GbTo-54 and 499 for GbTo-13 (81). Rank-linked artifact and faunal distribution indicated that one house was a chief's residence, yet even the poorest houses appear to have had much more wealth than at almost all other sites in Prince Rupert Harbour, suggesting regional and intra-village ranking. One purposeful dog burial was found just outside the chief's house at GbTo-54. Some 300 dog bones and 21 wolf bones were recovered from GbTo-54, and 25 dog from GbTo-13. The dogs are smaller than the wolves in the area, and so the two species can be distinguished. Three dogs and two wolves were used for this analysis.

*Reinhardt, Ohio (OSU\_F5607; AL2772)*

The Reinhardt site (33PI880) is a middle period (AD 1200-1400) Fort Ancient village site in the Scioto Valley, Ohio. The site was first systematically excavated in 1988, and was identified as an approximately 91-meter diameter midden ring visible on the surface immediately adjacent to a terrace edge located 150 meters from the Scioto River (82, 83). More recent survey and excavations confirm that the site was a circular, or



arc shaped, village, with a small central plaza (82). Associated AMS dates from wood charcoal and a single human burial support the dating of the site to within the Middle Fort Ancient period (82), though bifaces from at least four earlier time periods were recovered during excavations.

Excavations in 2008 revealed a small number of canid remains, including two individual dog burials (39, 83). The specimen in this study is from a fully articulated, adult, male dog with heavily worn teeth, that was found buried under a layer of sand with a turkey bone awl (83). Significant pathologies to the dog were recorded, including vertebral pathologies representing either severe arthritis, or a healed infection, and an abscess in the right M2 (39). In their analysis of the two dog burials, Nolan and Sciulli (39) conclude that there was significant variation between dogs at the Reinhardt site, though their sample size was prohibitively small. Comparisons with other dogs from the region indicate little change in morphology between the Archaic and later prehistoric periods, despite this being a time of intense cultural transmission and changes in subsistence patterns and lifeways (39, 84).

The role of dogs in the prehistoric Eastern Woodlands is intimately connected with the prevalence of dog burials throughout the Archaic period, a tradition which continued to a lesser degree into the later prehistoric periods (38). Dogs in this region were known to serve a variety of purposes, such as for transportation, hunting, companionship and as a food source. Dogs also participated in ceremonial and ritual activity, and dog sacrifices were not uncommon (38, 85, 86). The individual burial of dogs at Reinhardt suggests a level of intimacy remained between the Fort Ancient people and at least some of their dogs, though isolated dog remains found throughout the site indicate that this intimacy was not afforded to all dogs equally.

*Scioto Caverns (OSU\_4816\_1\_1, OSU\_4816\_2\_2, OSU\_4816\_2\_4, OSU\_4816\_2\_6, OSU\_4816\_2\_8, OSU\_4816\_3\_4, OSU\_4816\_3\_8; OSU611, OSU622, OSU624, OSU626, OSU628, OSU634, OSU638)*

The Scioto Caverns site in Ohio are a series of three limestone caverns located near the Scioto River and Wright-Holder earthworks complex (87). The bones of 25 dogs have also been recovered from this deposit, including 5 nearly-complete skulls and 11 mandibles. The dogs are likely from the Hopewell period (200 BC - 500 AD), based on the nature of their burial, in which they were covered with limestone slabs. Based on their size, the dogs seem similar to Archaic dogs identified from Kentucky and Alabama, and are smaller than Woodland period dogs from the Midwest.

*Simonsen Bison Kill (ISM\_13CK61\_7\_2; AL2699/ISM172)*

The Simonsen site is located in northwest Iowa, near Quimby, and its usage dates to the Paleoindian and Archaic periods (88). It has been suggested to be a bison kill site, given that the majority of remains at the site are of bison, and there are large numbers of points associated with the bison (89). Three zones at the site contained cultural material (88). The deepest has a small number of artifacts and the most bison bones, likely from *Bison occidentalis*. The middle horizon contains charcoal as well as a single artifact,

while the highest zone contains charred wood and ash suggestive of a firepit, as well as the ramus of a large dog, which was used in this analysis.

*Tizayuca (MT04\_1661, MT02\_707; AL2546, AL2552)*

Tizayuca (Hidalgo, Mexico) is located in the Basin of Mexico, at only 20 km of Teotihuacan, the largest urban center of Mesoamerica from 1,800-1,400 BP. Operations of rescue archaeology, between 2004 and 2009, allow the identification of at least three successive occupations during the Classic (c. 1,800-1,500 BP), Early Postclassic (c. 1,100-800 BP) and Middle/Late Postclassic (c. 800-500 BP) under the respective influence of Teotihuacan, Toltec and Aztec cultures (90). Over 800 dog bones have been identified, from neonatal to adults, representing at least 41 individuals. Cut marks and burning patterns suggest the consumption of dogs, but several individuals have also been buried in residential and ceremonial areas (91).

Sample AL2552 comes from a partial articulated skeleton buried in a Teotihuacan residential compound. The presence of a baculum indicates it was a male. Sample AL2546 comes from a disarticulated skeleton found in the basement of a domestic household related to Aztec occupation.

*Uyak, Alaska (HMCZ\_38342; AL3198)*

The Uyak Site (KOD-145), also known as “Our Point”, is a substantial prehistoric midden at least three meters deep, covering hundreds of acres and located on the western side of Kodiak Island, Alaska. The site was excavated by physical anthropologist Aleš Hrdlička from 1933-1936 for the United States National Museum (now the National Museum of Natural History), and consisted of house structures and hearths, stone and organic artefacts, human remains, and a large faunal assemblage (92). The stratigraphy of the midden deposits was divided into three layers by Hrdlička’s team based on artifact type and deposit descriptions, and occupation dates from 2,000 BP to Russian contact in the mid-18th century were suggested (92–94). More recent AMS dating of a selection of dog and fox bones confirms that the site was occupied during this period (95). Due to the long occupation history of the site, and without direct dating, the cultural context of the study specimen can only be summarized to span both the earlier Kachemak phase (4,000-900 cal BP) and the later Koniag phase (900-200 cal BP), as it is clear dogs were present throughout the occupation (92, 96). Both cultures were maritime hunter/gatherers, though debate still surrounds whether the nature of the relationship between the two cultures was a direct ancestral relationship or a replacement event (92, 97).

Primarily concerned with the recovery of human remains, Hrdlička and Allen prioritized the collection of only well-preserved and intact canid remains (96), and noted that dogs were ubiquitous throughout the site. Hundreds of domestic dog remains were collected, and early metric analysis identified two types of dogs, classified as a “small” and a “large” type (96). While Hrdlička (92) originally suggested that the small type was restricted to the earliest deposits, later replaced by the large type, other studies have noted size variability among contemporary prehistoric canids throughout the Kodiak archipelago (98), and more recent work suggests the variation could be a result of sexual dimorphism (95).

Excavation of the specimens was poorly recorded, so it is unknown what context the dog remains were found in, and whether they represent intentional burials, midden/refuse deposits or some combination of deposition types. This makes any interpretation of the role of dogs at the site difficult, though cut marks suggesting butchery were recorded on a portion of both mandibular and cranial elements (99). Dogs are a known food source, both preferentially or as a “fall-back food” during times of hardship, and additionally serve a variety of other functions in the Arctic, including assisting in prey acquisition, transportation, sanitation through food waste disposal, and even warmth (100–102). As the region’s sole domesticated, it is likely the dogs at Uyak fulfilled several of these roles simultaneously.

*Weyanoke Old Town, Virginia (DB49-LC1, DBU2-LM1; AL3226, AL3223)*

The Weyanoke Old Town site, also known as the Hatch site, is located on a tributary of the James River on the coastal plain southeast of Richmond, Virginia. The site was excavated between 1975 and 1989 by the Virginia Foundation for Archaeological Research, Inc. (103, 104) and covers over 4,329 sq. meters (105). Based on associated artifacts, occupation at the site spans from at least the early Archaic through the early English Colonial period, when the Virginia Algonquians occupied the region ((103). The site was home to a Weyanoke (Weanoc tribe) village dating from the prehistoric through the early Colonial period (106, 107)).

Over 112 domestic dogs have been recovered from the site, one of the largest discoveries of domestic dogs in the Americas (85, 105, 108). The dog was the only domesticated animal of the Virginia Algonquians ((109)) and what little is known about the use of native dogs in the region is pieced together from early accounts in contact-period historic documents. There is no evidence that dogs at Weyanoke were used for food, as all dogs were recovered in isolated and associated burials (c.f. (76)), articulated with no evidence of cut marks or burning (105). Dogs of the Virginia Algonquians are documented partaking in small and large game hunting and as protection from predators like wolves and bears (110, 111). Like other regions of the Midcontinent and Eastern Woodlands (112–114), dogs, both puppies and adults, played an important role in burial with humans at Weyanoke. It is unclear whether dogs at Weyanoke were viewed as companions, ritual offerings, or both, but dog sacrifices were not uncommon among contact-period tribes (e.g., (115, 116)).

Descriptions of the Virginian native dog often mention a wolf-like ((116–119) or fox-like ((120) appearance with an inability to bark and a propensity for howling. In an analysis of the Weyanoke Old Town skeletal material, Blick ((108)) noted the dogs there are clearly domesticated and not wolf-like in their cranial and postcranial skeletal morphology. He later proposed that admixture between local wolves and aboriginal dogs may explain the reported “wolf-like” behavior and appearance of Algonquian dogs ((105):6). They stood an average of 42 cm high and weighed approximately 10kg, similar to a medium-sized Algonquian native village dog depicted in a 1585 painting by John White (see (121):62, Plate 32). This painting, the earliest depiction of a Native American dog by a European, shows a knee-height, medium-sized yellow-brown dog with pricked

ears and a long tail, similar to many modern village dogs or dingoes. In contrast to this, in 1602 John Brereton described dogs in coastal Massachusetts as “fox-like, black, and sharp-nosed” ((120):13). The Weyanoke canids are associated with Late Woodland period artifacts, confirming their native ancestry and lack of inbreeding with later introduced European breeds. This is supported by direct radiocarbon dating of one of the dog used for DNA analysis (AL3223) to 985-935 cal BP (OxA-35,516).

#### *Yellow Jacket Pueblo (5MT501)*

Yellow Jacket Pueblo was a large village in the Central Mesa Verde region that was occupied during the Late Pueblo II through the Pueblo III periods (roughly AD 1050-1260) (122). The village had a number of public and ceremonial structures, including room blocks, plazas, kivas, small towers, and what may be the a Chacoan Great House. A small number of canid remains have been identified (NISP = 27), including one bone that was specifically identified as belonging to a dog. Some of the canid bones show evidence of burning or cut marks, suggesting that these dogs were used as food.

*Zhokhov (Zhokh2004-18, Zh-90-2, Zhokh2004-19, Zh-90-1, Zhokh2004-113, Zh-03-97, Zh-90-3, Zh-04-154, Zh-05-29; CGG1, CGG2, CGG3, CGG4, CGG5, CGG6, CGG7, CGG8, CGG9)*

Zhokhov Island is located off of the northeastern coast of Siberia (123, 124). Human occupation of Zhokhov began in the Late Pleistocene period, with the earliest evidence for humans at the site dating to 9,000 years ago ((124) . House pits have been identified from this time period, as well as bone and antler fragments and abundant amounts of wood. Small blades and bone and ivory points have also been recovered from the site, as well as a fairly sophisticated sledge runner for the time period. Two fragmented dog mandibles, as well as a small number of postcranial bones, have been recovered from the site, and date to the earliest period of human occupation. They are smaller than wolf mandibles, and are similar in size to other ancient Arctic dog remains that have been recovered. Previous mitochondrial DNA sequencing has demonstrated that the dogs belong to Haplogroup A, and are genetically indistinguishable from modern domestic dogs in the hypervariable region of the mitochondrial genome (27).

#### Ancient DNA - University of Oxford

##### *DNA extraction*

DNA was extracted from teeth or bone samples (see Table S1) in a dedicated ancient DNA laboratory using the appropriate sterile techniques and equipment. Extraction was carried out following the Dabney extraction protocol (125) but with the addition of a 30 minutes pre-digest stage (126).

##### *DNA Sequencing*

Illumina libraries were built following (127), with the addition of a six base-pair barcode added to the IS1\_adapter.P5 adapter. The libraries were then amplified on an Applied Biosystems StepOnePlus Real-Time PCR system to check that library building was successful, and to determine the optimum number of cycles to use during the indexing amplification PCR reaction. A six base-pair barcode was used during the indexing amplification reaction resulting in each library being double-barcoded with an

“internal adapter” directly adjacent to the ancient DNA strand and which would form the first bases sequenced, and an external barcode that would be sequenced during Illumina barcode sequencing. Libraries were sequenced on an Illumina HiSeq 2500 (Single End 80bp) sequencer at the Danish National High-Throughput Sequencing Centre and on a Illumina NexSeq 500 (Single End 80bp) at the Natural History Museum (London).

#### Ancient DNA - University of Illinois

Most of the DNA extractions were performed at the University of Illinois at Urbana Champaign, at the Carl R. Woese Institute for Genomic Biology, with methods described in Witt et al. (7), but a subset of extractions was performed at the Centre for GeoGenetics at the University of Copenhagen, with methods described in Allentoft et al. (128).

At the University of Illinois, genomic libraries were built for the extracts using the NEBNext DNA Library Prep Kit for Illumina (New England Biolabs). They were amplified twice, first using the NEBNext DNA polymerase and the associated index primers, to allow the samples to be pooled and sequenced together. The first amplification followed manufacturer instructions, and was repeated for twelve cycles. For the second amplification, Phusion High-Fidelity PCR Master Mix with HF buffer (New England Biolabs) was used, and four PCR reactions were made for each sample. Five  $\mu$ L of PCR product from the first amplification was added to each reaction, and the DNA was amplified according to manufacturer’s instructions for 12 cycles. The four reactions for each sample were pooled and cleaned using Ampure XP (Beckman Coulter) and MagSi-DNA NGS<sup>PREP</sup> beads (MagnaMedics), using an 80% ethanol: sample ratio. The library was visually examined on an agarose gel, and quantitated using a Qubit 1.0 fluorometer (Thermo Fisher Scientific). Only libraries with concentrations of at least 20 ng/ $\mu$ L were used for capture.

To enrich for mitochondrial DNA, we developed a custom set of RNA baits as part of a myBaits kit (Arbor Biosciences) that covered the complete dog mitogenome with 4x tiling density (see Table S1 for details on the samples that were captured). Captures were performed using the myBaits manual version 3.01 at the University of Illinois, with a 60° C incubation for 28 hours. The heat elution step was skipped, and the capture was amplified using KAPA Hi-Fi polymerase, following manufacturer’s instructions for 16 cycles. The PCR reaction was cleaned using MagSi-DNA NGS<sup>PREP</sup> beads (MagnaMedics), and the capture was visually examined on an agarose gel and quantitated using a Qubit 1.0 Fluorimeter, following the manufacturer’s instructions. If the DNA concentration of the amplified capture was lower than 20 ng/ $\mu$ L, the capture was reamplified for 8 cycles using the KAPA polymerase prior to sequencing.

At the University of Copenhagen, genomic libraries were built from the extracts using the NEBNext DNA Library Master Mix Set 2 (New England Biolabs), with modifications. The End Repair mix was incubated for 20 minutes at 12° C and 15 minutes at 37° C. The Quick Ligation mix was incubated for 20 minutes at 20° C. The Fill-In mix was incubated for 20 minutes at 65° C and 20 minutes at 80° C. Each step was purified using a Qiagen MinElute PCR Purification Kit. The protocol was followed as directed except that a differing amount of EB Buffer was used for each mix (30  $\mu$ L for

End Repair, and 42 uL for Quick Ligation) and the column was incubated for 15 minutes at 37° C prior to elution. The finished libraries were amplified using Taq Gold in a mix that included 10 uL Taq Gold Buffer, 2.5 mM MgCl<sub>2</sub>, 0.8 mM uL BSA, 0.08 mM dNTPs, 0.2 μM of each of Illumina's Multiplexing PCR primer and a custom-designed index primer with a six-nucleotide index and 2 uL Taq Gold, in a total volume of 100 uL. qPCR was performed on the libraries to assess the quantity of DNA. The PCR conditions were followed according to manufacturer's directions, amplifying for 10-14 cycles, depending on the qPCR results. The PCR reaction was purified using the QIAQuick PCR Purification Kit, with elution in 30 uL EB Buffer and an incubation at 37 C for 10 minutes prior to the elution step. DNA concentration was assayed using a Qubit 2.0 Fluorimeter, following manufacturer's instructions. If the DNA concentration was less than 20 ng/uL, a second PCR amplification was performed using Phusion. The mix included 20 uL template DNA, 2 uL each of primers IS5 and IS6, 50 uL Phusion Master Mix, and 26 uL H<sub>2</sub>O. The PCR program followed manufacturer's instructions but for 6-10 cycles, and was purified with a QIAQuick PCR Purification Kit as described above. The capture procedure was performed following manual version 2.3.1 at the University of Copenhagen, with a 65 C incubation for 18 hours. The heat elution step was skipped, and the capture was amplified using KAPA Hi-Fi polymerase, following manufacturer's instructions for 16 cycles. The PCR reaction was cleaned using a QiaQuick PCR Purification Kit, eluting 30 uL of EB Buffer after a 15 minute incubation at 37 C. The capture was visually examined and quantitated using an Agilent 3300 Bioanalyzer. If the DNA concentration was lower than 20 ng/uL, the capture was re amplified using the KAPA polymerase.

Samples were pooled 8-10 individuals to a sequencing lane, and were sequenced on an Illumina HiSeq 2500 (80 or 100 bp). The samples captured at Copenhagen were sequenced at the Danish National DNA Sequencing Center, and the samples captured at the University of Illinois were sequenced at the Roy J. Carver Biotechnology Center at the University of Illinois.

#### Data processing - ancient DNA

Raw reads were filtered allowing one mismatch to the indices used in library preparation. Adapter sequences were removed using AdapterRemoval (129). Reads were aligned using Burrows-Wheeler Aligner (BWA) version 0.7.5ar405 (130) to canFam3.1, with default parameters apart from disabling the seed option ("1 1024") (131). FilterUniqueSAMCons (132) was then used to remove duplicates. BAM files from different sequencing lanes were merged using the MergeSamFiles tool from Picard v1.129 (<http://broadinstitute.github.io/picard/>). To accommodate the low coverage of the nuclear genome of our newly sequenced North American dogs, genotypes were called by randomly sampling a single read of 20 base pair minimum and with a mapping quality (MAQ) and base quality (BQ) of at least 30 at each covered position in the genome, excluding bases within 5bp of the start and end of a read (133–135). The Newgrange dog was genotyped similarly as modern data (except for 5bp at start and end of a read; see below)(16).

For the mtDNA we generated majority consensus (using reads with BQ $\geq$ 20 and MAPQ $\geq$ 30) sequence for all samples that had at least 3x average coverage (71 samples; Table S1) excluding bases within 5bp of the start and end of a read.

Molecular damage was assessed using MapDamage2.0 using default parameters (136) (Figure S1; Figure S2). Most samples display clear signs of deamination (Figure S1; Figure S2). Samples AL3231 and AL2696 display limited deamination patterns consistent with these being from a relatively recent time period (1000-1400 AD; Table S1).

#### Publically available data

Raw reads/bam files for 47 canid genomes (13–16) were downloaded from NCBI or *DoGSD* (137)(Table S2). Samples downloaded from NCBI were aligned to the CanFam3.1 reference genome using BWA mem (130). We computed depth of coverage (DoC) for each sample using bedtools (138). These genomes were chosen due to their high coverage and geographic spread covering North and South American, East Asian, and Western European (African, Indian and European) dogs, as well as Eurasian and American gray wolves and Coyotes and an outgroup (*Lycalopex culpaeus*; Andean fox). We also obtained data from two additional publically available CTVT genomes (20), genome data from an ancient wolf from the Taimyr peninsula (139) and from an ancient Irish dog (16).

Lastly we obtained data from 5,406 modern dogs that were genotyped on the semi-custom CanineHD SNP array (~185K SNPs) developed by (9).

#### Genotyping

##### *Dog samples*

We used samtools ‘mpileup’ (0.1.19) (140) to call genotypes with default settings. Pileup files were further filtered, for each sample, using the following criteria:

- Minimum DoC  $\geq$  6
- Excluded all sites in region of high DoC (top 5%)
- Excluded all sites within 3bp of an indel
- Only bases with quality  $\geq$ 30 within reads with mapping quality  $\geq$  30 were used.
- Minimum fraction of reads supporting heterozygous (variant allele frequency [VAF]  $\geq$  0.3) - all sites that did not pass this criteria ( $0 < \text{VAF} < 0.3$ ) were coded as missing (N).
- For high coverage ancient sample (Newgrange dog) we also discarded the first and last 5bp of each read for genotype calling, to avoid incorporating errors from deaminated sites (see above).

The Taimyr wolf was processed using the same random read approach used for the other ancient data (see above).

##### *CTVT*

Ancestry analyses were performed using data from two CTVT genomes that have been previously described, 24T and 79T. The goal was to determine the phylogenetic placement of CTVT within a cohort of modern and ancient dogs. CTVT genomes carry two types of genetic variation: germline variation inherited by the CTVT founder dog, and somatic variation acquired during the somatic evolution of the CTVT clone. The goal of this part of the analysis was to capture CTVT germline variation, and to use this to include CTVT in a phylogenetic analysis.

We generated a list of callable sites in CTVT using the criteria outlined in ‘*Genotyping - Dog samples*’. Only regions that retained germline diploidy, as previously described (20), were considered. Sites were further filtered to retain only those sites in which the variant allele fraction (VAF) for a non-reference allele was  $\geq 0.1$  in at least one CTVT tumor, and for which no more than two nucleotides were detected at  $VAF \geq 0.1$  (i.e. multi-allelic sites were rejected). These sites were defined as single nucleotide variant (SNV) candidates

CTVT tumor biopsies contain both CTVT cells and host cells. The latter derive from stromal, immune and blood vessel components. Thus DNA derived from CTVT tumors is an amalgam of CTVT and matched host DNA. In order to identify and exclude SNVs derived exclusively from the matched host, as well as to correctly genotype alleles shared between CTVT and matched hosts, we took the following approach. Sites identified as SNV candidates (see above) were genotyped in genomes 24H and 79H, the matched hosts for tumors 24T and 79T(20). The genotypes of 24H and 79H were inferred using the following VAF thresholds:

homozygous reference:  $VAF < 0.2$   
heterozygous:  $VAF = [0.2-0.8]$   
homozygous alternative:  $VAF > 0.8$ .

Using the known host contamination fractions for 24T and 79T (20), we used the following VAF thresholds to genotype SNV candidates in CTVT cells. SNVs that were homozygous reference in the matched host were genotyped in CTVT using the following VAF thresholds:

Homozygous reference:  $VAF < 0.2$   
Heterozygous:  $VAF = [0.2-0.6]$   
Homozygous alternative:  $VAF > 0.6$

SNVs that were heterozygous in the matched host were genotyped in CTVT using the following VAF thresholds:

Homozygous reference:  $VAF < 0.3$   
Heterozygous:  $VAF = [0.3-0.7]$   
Homozygous alternative:  $VAF > 0.7$



SNVs that were homozygous alternative in the matched host were genotyped in CTVT using the following VAF thresholds:

Homozygous reference:  $\text{VAF} < 0.4$

Heterozygous:  $\text{VAF} = [0.4-0.8]$

Homozygous alternative:  $\text{VAF} > 0.8$

CTVT SNVs were further processed as described below (*Ascertainment panel*).

#### *Ascertainment panel*

All genotypes from all genome-wide samples were then merged using bedtools. Ascertainment was done without outgroups (but including Coyote). We selected all bi-allelic markers excluding sites that 1) were heterozygous in only one sample (Table S2) (required a minimum of two chromosomes in our set of samples to carry the derived allele; in the case of sites only variable in CTVT we required the two genomes (24T and 79T) to be homozygous to limit the inclusion of somatic mutations into the list of SNPs 2) sites that were not covered in our outgroup (Andean fox) 3) sites with more than 20% missing data across samples. All low coverage ancient samples were excluded from this step. As the two CTVT matched hosts, 24H and 79H, were not included in our ascertainment panel (Table S2), the genotypes of these two individuals were not taken into account when determining which CTVT SNPs were represented in other dog genomes. This resulted in ~6.21M high quality SNPs. We then excluded all sites that were outside of the germline diploid region in CTVT (20). This resulted in ~2.03M SNPs, including ~600K transversions.

#### mtDNA analysis

##### *RAxML*

We used all samples with at least 3x average coverage and consensus sequences with at least 80% coverage over the entire mtDNA genome were considered for further analysis. We further obtained ancient and modern mtDNA genomes from (141). This data set contains representative samples of all four major haplogroups (A, B, C, D) including 3 ancient American dogs. We aligned the data using mafft v7.2 (142, 143). We built a maximum likelihood tree, with 100 bootstrap replicates using GTR+G model as implemented in RAxML (144).

All but one ancient American mtDNAs formed a monophyletic clade within haplogroup A, (bootstrap value=87; Figure S3). North American dogs further cluster with ancient sled dogs from the the island of Zhokhov in Eastern Siberia (124). Unsurprisingly, samples CGG10-11 (Aachim dogs) fall outside of the Zhokhov / pre-contact clade as these are recent sled dogs from Siberia (~1.5kya; Table S1). Lastly, one sample from British Columbia (Prince Rupert Harbour site; PRW89; ~1.5Kya) clusters with North American wolves. Wolves and dogs are poorly distinguished at this site (see above) so the sequence of this sample might be from a wolf - although interbreeding between wolves and dogs is also a possibility (see below).

We then assessed whether previous studies that used control region of the mtDNA were able to identify the pre-contact monophyletic clade we have identified here (Figure S3). To do so, we extracted the control regions from all samples, that overlapped with the fragments analysed in (5) and (8) (605 bp in total), filtering out samples with more than 10% missing data and a ML tree with RAxML. The result of this analysis are presented in Figure S4. We found that while the control region has the power to distinguish between the major dog haplogroup (A, B, C, D) it did not possess the power to distinguish between pre-contact dog and other dogs within haplogroup A.

We expanded our mitogenome sample size to assess whether the mtDNA haplogroup that we had identified in pre-contact dogs exists in modern America dogs. To do so we used 942 additional mitogenomes from a worldwide sample of dogs, including CTVT and hosts genomes as well as 169 village and breed dogs that were sampled in North and South America (145–149). Description and accession number of all additional samples can be found in (145–149) (in Supplementary file 1 and 8 of . We combined this data with the mtDNA genome analysed above and built a maximum likelihood tree, with 100 bootstrap replicates using a GTR+G model as implemented in RAxML (144). Out of 667 modern domestic dog genomes analysed here we found only five modern samples with a pre-contact mtDNA haplogroup (Figure S5): 1) Terrier cross from San Juan del Sur, Nicaragua (Accession: KU291094), 2) Chihuahua (Accession: EU408262) 3) Japanese Spitz (Accession: EU789755) 4) non-breed dog from Shanxixian, China (Accession: EU789669) 5) non-breed dog from Laem Ngop, Thailand (Accession: EU789664).

Interestingly, two out of five of these sequences are from American dogs (Chihuahua and Nicaragua dog). Three, however, are from East Asia. This is surprising and suggests a very low frequency of the PCD haplogroup in East Asia (~2.5%). All five modern samples cluster together with ancient Mexican dogs from Mayapan (Figure S5). Multiple scenarios could explain the finding of East Asian dogs within the PCD clade: 1) the clade to which these East Asian samples belong diverged from PCD dogs prior to their introduction into the Americas 2) there was some back and forth migration of dogs between America and Asia after the flooding of the land bridge between Western and Eastern Beringia ~11,000 years ago (150) 3) these sequences were mislabelled.

#### *BEAST*

We used BEAST v1.8.4 (151) to calibrate the evolutionary rate of our canid data set. We restricted this analysis to sequences with at least 10x average coverage (Table S1). The mtDNA was partitioned into four categories (tRNA, rRNA, control region and coding sequence). We fitted a separate substitution model to each partition: tRNA (HKY+I), rRNA (TN93+G), control region (HKY+G+I) and coding sequence (SDR06) as selected by Akaike information criteria (AIC) using partitionfinder (152). The same tree was used for all four partitions. Age of archeological samples was used as prior (uniform distribution of tip age). We used a Bayesian Skyline prior (153)(group size parameter = 10) and a strict molecular clock as in (141) (uncorrelated clock was also tested and did not result in noticeable changes). We ran 50 million Markov chain Monte Carlo (MCMC) chains and sampled tree parameters every 5,000 iterations. Convergence

was evaluated with Tracer v 1.6.0 (ESS for each parameter  $\geq 100$ ). Trees were summarized using Maximum Clade Credibility as implemented in TreeAnnotator v1.8.4 (10% burn-in).

BEAST retrieved the same topology as RAxML, with all pre-contact dogs forming a highly supported monophyletic clade (with a posterior probability of 0.99; Figure S6). We estimate that TMRCA of all pre-contact dogs is  $\sim 14666$  years (95% HPD: 12965-16484) and that the time to most recent common ancestor (TMRCA) of all sampled  $\sim 15606$  years ago (95% HPD: 13739-17646).

We also inferred the age of the MRCA between the Mayapan dogs and the five modern dogs identified as monophyletic with PCD (Figure S5). We found that these five modern dogs diverged from the Mayapan dogs between 9,865 and 6,289 years ago (95% HPD) suggesting that their divergence postdates the flooding of the land bridge between Western and Eastern Beringia. Given this results, it is unlikely that the mtDNA haplotype of these dogs originated in Eurasia. These results instead suggest that dogs carrying PCD ancestry have been transported from Americas into East Asia. This most likely took place during recent times and could be linked to the creation of hairless dog breeds in Asia (154). However, more research is needed to further test these possibilities, especially given the possibility of mislabelling in databases such as GenBank.

### Nuclear ancestry analyses

#### *PCA*

Using smartpca (155) we performed Principal Components Analysis (PCA) using various projections and data sets on our 2.03M SNPs:

1. All canids (including wolves and coyotes) - PCD samples projected (Figure S7)
2. Only dogs (excluding wolves and coyotes) - PCD samples projected (Figure S8)
3. Only dogs (excluding wolves and coyotes) - PCD and CTVT samples projected (Figure S9)

For PCD we used all 7 samples for which we could call at least 10,000 sites (minimum number of sites suggested for ancient DNA analysis (128)). We used all available sites (sites covered in at least 1 ancient sample;  $\sim 1.5$ M SNPs) to compute the eigenvectors and then projected PCD onto that space. We also projected CTVT to ensure that their placement was not an artefact of somatic mutations.

Figure S7 shows that PCD are more closely related to dogs (except for one sample, AL2135 from Koster; see below) than wolves or coyotes. It also shows that dogs are less variable than wolves or coyotes. Figure S8 shows a distinction between Arctic, East Asian, and European dogs. Lastly, Figure S9 recapitulates the same results demonstrating that this result is not induced by somatic mutations in CTVT and also shows how PCD and CTVT are more closely related to each other, and fall in between Arctic dogs and all other dogs. A PCD sample (AL2135; Koster, Illinois) was projected in between dogs and wild canids (Figure S7). This suggests that this sample is admixed with wild canids (see

D-statistics analyses below). Its mtDNA haplotype, however, clusters with other PCD dogs (Figure S3).

#### *Neighbour joining tree*

We used plink v1.9 (156) to compute an Identity By State (IBS) matrix using all 2.03M SNPs. This matrix was used to build a neighbour joining tree (NJ) using the R package “ape” (157); (Figure S10). The tree recapitulates the deep split between East Asian and Western Eurasian dogs (16) and confirms that CTVT is more closely related to the PCD dogs than to any other dog population (bootstrap=100). It also shows that CTVT/PCD form a monophyletic group with Arctic breeds that fall outside of the rest of the dogs. The tree also confirms that PCD form a monophyletic clade with high support (bootstrap = 100).

Admixture analyses (see D-statistics below) show that all East Asian dogs, excluding Vietnamese Village dogs, are significantly admixed with European dog populations. Such disproportionate admixture could affect the topology of the tree. To test this we built a tree excluding all East Asian dogs except Vietnamese. This tree shows a different topology with Vietnamese still grouping with Dingoes, however, PCD, Arctic dogs and CTVT are now more closely related to Western dogs than to Asian Dogs (Figure S11).

#### *Bayesian Tree*

We built a phylogeny using nuclear genotypes with MrBayes 3.2 (158). To do so we used PGDSpider 2.0.9.2 (159) to build a Nexus file with discrete SNP format (0=reference, 1=heterozygous, 2=homozygous alternative). We used the Mkv model (160) implemented in MrBayes (Ordered character), which provides a likelihood framework for data sets that contain only variable characters. We also imposed a minimum distance of 10Kb between SNPs to limit the influence of linkage disequilibrium (LD) and lastly included only PCD samples with higher coverage (AL3194 and AL3223; Table S1; ~30K SNP total).

We ran two independent runs of four MCMC chains with two million samples. Trees were summarized discarding 25% as burnin. To limit biases from missing data we limited this analysis to transversions that were covered in 90% of our samples. Convergence was assessed by ensuring that average standard deviation of split frequencies was below 0.01 and that the potential scale reduction factor was close to 1 for all parameters. This analysis confirms that CTVT and PCD are monophyletic with high support (Posterior probability [PP] = 1; Figure S12) and the basal placement of the CTVT/PCD clade. However, this analysis suggests that modern Arctic dogs are more closely related to Eurasian dogs than to PCD. This is most likely due to the complex ancestry of Arctic dogs such as admixture from European dogs (see below; Table S4).

#### *f3 statistics*

We computed outgroup  $f_3$ -statistics as  $f_3(\text{pre-contact dogs [PCD]}, X; \text{outgroup})$  using ADMIXTOOLS (161) where X is any other dog population (see Table S2), to quantify the amount of genetic drift shared between pre-contact dogs and other dogs

using only transversions (Figure S13). For this analysis, we used only two PCD samples (AL3194 and AL3223; Table S1), with  $\sim 1.9x$  and  $\sim 0.5x$  coverage, respectively. Our results support our NJ tree (Figure S10) demonstrating that PCD is more closely related to CTVT and Arctic dogs than any other dog population. These results also support the observation that PCD/CTVT and Arctic breeds are equally related to all other dogs, except for Basenji and one Indian dog, which could be due to admixture from wolves into these two samples (e.g. Indian wolf or golden wolf).

#### *D-statistics*

We only used two PCD samples with  $\sim 1.9x$  and  $\sim 0.5x$  coverage (AL3194 and AL3223; Table S1) for these analyses, except when explicitly mentioned (e.g. Koster dog AL2135; see below). We used all 2.03M SNPs.

#### *PCD is more closely related to CTVT and Arctic breeds*

We computed  $D(\text{Outgroup}, \text{PCD}, \text{Pop3}, \text{Pop4})$  using ADMIXTOOLS (161) where Pop3 was fixed as either European dogs, Asian dogs, Arctic dogs, or CTVT and Pop4 represented any possible other sample. We plotted, as box plots, the results of these combinations (Figure S14; Figure S15). Positive values imply that PCD shares more derived alleles with the population on the y axis, while negative values imply that pre-contact dogs are closer to the other dog populations. The results indicate that PCD do not share any more derived alleles with European dogs than they do with Asian dogs, suggesting that they are equally related to both. This result supports our  $f_3$ -statistics and NJ tree finding that PCD and CTVT are equally related to European and Asian dogs (Figure S10; Figure S13). Arctic breeds also appear more closely related to PCD/CTVT than any other dog population (Figure S14; Figure S15; Figure S13).

#### *Admixture between Coyote / North American wolves and PCD*

We tested for admixture from wild North American canids into higher coverage PCD genomes (AL3194; AL3223). To do so we computed  $D(\text{Outgroup}, \text{Coyote/North American Wolf}, \text{Pop3}, \text{Pop4})$  where Pop3/4 can be any dog genome. We found that in both cases  $Z$  values were mostly above 3 in most cases (Figure S16; Figure S17) for both AL3194 and AL3223 indicating admixture from Coyotes / North American Wolves in PCD samples. We also tested for extra admixture from wild canids into our higher coverage PCD genomes (AL3194; AL3223). To do so we computed  $D(\text{Outgroup}, \text{Coyote}, \text{AL3194}, \text{AL3223})$  and  $D(\text{Outgroup}, \text{American Wolf}, \text{AL3194}, \text{AL3223})$ . We found no evidence of extra admixture from wild canids into these samples (Table S3).

We computed  $D(\text{Outgroup}, \text{Coyote}, \text{CTVT}, \text{B})$  and  $D(\text{Outgroup}, \text{American Wolf}, \text{CTVT}, \text{B})$  where B represented every possible pair of populations to determine whether there was any detectable admixture from Coyote and American wolf populations into the CTVT founder dog (Figure S16; Figure S17). We also found evidence that the CTVT founder dog shared more derived alleles with Coyotes than other non-PCD population suggestive of admixture. This is consistent with TreeMix and Qpgraph analyses (see below). We note, however, that this pattern could be consistent with admixture in both direction (dogs to wolves / wolves to dogs; e.g. see (23)).

### *Estimating Eurasian ancestry in Arctic dogs*

Using D-statistics based on whole genome data we found evidence that all Arctic breeds are a mixture of the basal lineage (that leads to CTVT and PCD) and of the Eurasian dog lineage (Table S4).

### *Taimyr admixture into Arctic dogs, PCD and CTVT*

We used whole genome data to assess Taimyr wolf admixture into PCD, Arctic dogs and CTVT (139). We found few values with  $|Z| > 3$  (AL3194 and Alaskan malamute; Table S5). Lowering the threshold to  $|Z| > 2.5$ , we found admixture from the Taimyr wolf into PCD (both AL3194 and AL3223) as well as in all Arctic dogs (husky, Greenland sledge dog, and Alaskan malamute) and CTVT. We find no evidence for additional admixture from the Taimyr wolf into either CTVT, PCD or Arctic breed (Table S6). This suggests that Taimyr admixture into Arctic dogs suggested in (139) may have taken place after the PCD, Arctic dog and CTVT lineage diverged from Eurasian dogs but before the divergence of the Arctic dog and PCD/CTVT lineages.

### *Admixture from European dogs into East Asian dogs*

We tested for admixture from European dogs into east Asian dogs. Following (9, 16) we used Vietnamese village dogs as the reference East Asian population to test for by computing  $D(\text{Outgroup}, \text{Portugal}, \text{Vietnam}, X)$ . We found evidence of admixture in all East Asian populations test in this study (Table S7).

### *Potential evidence for Coyote admixture in Koster dog (AL2135)*

Our PCA analysis suggests that AL2135 is admixed with wild canids. To test this hypothesis we computed  $D(\text{Outgroup}, \text{North American canid} / \text{Taimyr wolf}, \text{AL2135}, \text{AL3194})$ . We restricted this analysis to AL3194 as it is the highest coverage PCD dog available in this study. We found borderline significant results ( $|Z| > 2$ ; Table S8) suggestive of admixture from Coyote into AL2135. This sample, however, is very low coverage (only ~17K SNPs were called). Its placement on the PCA and this positive admixture signal might therefore be due to this low coverage.

### *Estimating pre-contact ancestry in modern North American and Arctic dogs*

We used the SNP array data obtained from (9) to assess the degree to which modern dog populations found in North America retained ancestry from pre-contact dogs. This SNP panel contained 28 genotyped populations from North America, such as Peruvian village dogs, Alaskan village dogs or Carolina dogs (see Table S9 for the full list). We computed  $f_4$  ratios using ADMIXTOOLS (161, 162) to estimate admixture proportion ( $\alpha$ ) from pre-contact dogs into these populations by computing:

$$\alpha = f_4(A, O; X, C) \div f_4(A, O; B, C)$$

Where A is CTVT, O is the Andean fox (outgroup), B is PCD (AL3194 and AL3223), C is any European or East Asian population (see Table S9) and X is any American dog (see Table S9 and Figure S18). We computed  $\alpha$  for all combinations of European/Asian and modern North American populations (jackknifing was performed with a block sizes of 1 cM).

Besides the Alaskan Village dogs, we found no significant signal of pre-contact ancestry in modern North American populations ( $\alpha$  always  $<4\%$  and  $Z$  always  $< 3$ ; Table S10). Alaskan Village dogs, on the other hand, have  $\sim 17\%$  (11-20% and  $Z$  always  $> 4.5$ ; Table S10) ancestry derived from pre-contact dogs. We also used outgroup  $f_3$  statistics to assess the degree of shared drift between various populations available on the SNP array and PCD (Figure 2b).

To further assess this result we used ADMIXTURE (163) on a subset of the SNP array samples including all modern North American populations as well as Arctic dogs, “basal” breeds (164) and selected European and Asian populations (e.g. Boxer and Chow-Chow).  $K=4$  was selected as the best  $K$  value based on 10 fold cross validation (Figure S19). This analysis support previous  $f_4$  ratio analysis showing that most modern North American dog populations have little pre-contact ancestry ( $<4\%$ ; Figure S20). ADMIXTURE, however, detects some evidence of limited PCD/Arctic ancestry in Carolina dogs ranging from 0-33% (Figure S20; population CD). Such signal might not have been detected by our  $F_4$  analysis as a result of the variable amount of ancestry in this population. This analysis also reveals an affinity between Chinook and PCD/Arctic breeds (12-15%; Figure S20). This is not surprising given that Chinook dogs are considered as Sledge dogs. With  $K=4$ , however, we cannot distinguish between PCD and Arctic dogs ancestry. This PCD/Arctic component in Carolina dogs and Chinook might therefore be the result of admixture with Arctic dogs rather than PCD. To test this we tried to separate PCD/Arctic ancestry with higher  $K$  values. Both  $K=10$  and  $K=15$ , however, failed to differentiate PCD and Arctic dog ancestry (Figure S20) but instead differentiated New World Arctic dogs (Alaskan malamute and Greenland sledge dogs) from Old World Arctic dogs/PCD (Figure S20).

Alaskan Village dogs were the population of north American village dog with the most PCD admixture. This is not surprising as these are closely related to Arctic breeds (6, 9). The  $f_4$  ratio conducted above is thus not appropriate for this population (as it assumes close relatedness to Eurasian dogs; see Figure S18). Here we wanted to test whether these dogs have any pre-contact ancestry (interbred with pre-contact dogs). To do so we computed every possible combination of the same  $f_4$  ratio as above but using only Arctic breeds. We found that both Alaskan malamute and Greenland sledge dog have a significant amount of ancestry from PCD ( $\sim 4$ -14%; Table S11). This however, might be the result of substructure among Arctic dogs (see below).

We assessed whether these results could be affected by the ascertainment of the SNP array by repeating the analysis above (PCD admixture fraction into Alaskan malamute and Greenland sledge dogs) using whole genome data. We used only transversions for this analysis ( $\sim 600K$  SNPs). We found very little difference in admixture fraction ( $\sim 7$ -14%; Table S11) indicating that the ascertainment of the array did not introduce much bias.

We also used D-statistics on genome-wide data to test for admixture from PCD into Arctic breeds since their MRCA. As for the  $f_4$  ratio we found that both Alaskan

malamute and Greenland sledge dogs have a significant amount of ancestry from PCD (Table S12). We tested whether this signal could be due to admixture from Eurasian dogs into Siberian husky dogs (making derived alleles in Alaskan malamute and Greenland sledge dogs (GSD) match PCD more often; Table S13). We found evidence that the Siberian husky and Alaskan malamute genomes that we analysed here received gene-flow from European dogs (Table S13). However, we found no evidence that GSD received gene-flow since the MRCA of Arctic breeds. This suggests that Eurasian admixture did not affect our result. As stated above, this could also be the result of ancient substructure within Arctic dogs.

We found, however, no signal that either Alaskan malamute or Greenland sledge dogs shared an excess of derived alleles with PCD compared with each other ( $D(\text{Outgroup}, \text{AL3194}, \text{Alaskan malamute}, \text{Greenland sledge dog}) = -0.0001$ ,  $sd = -0.010$ ). This shows that these dog lineages did not receive additional gene-flow from PCD since their divergence from each other. This result suggests that the signal detected above (excess shared derived alleles between American Arctic dogs and PCD) is due to ancient substructure within Arctic dogs (165). More precisely, we hypothesise that the Eurasian Arctic dogs that were recently brought into the Americas, all the way to Greenland, originated from a population that was more closely related to PCD dogs than other Arctic dogs. The high degree of mtDNA divergence within ancient Eurasian Arctic dogs from Zhokhov (~9,000 BP; Figure 1b) suggests that ancient substructure with Arctic dogs is a plausible scenario.

#### *TreeMix*

In order to test the topology suggested by our phylogenetics and  $f_3$  statistics analyses we used Treemix (18) to build a tree with admixture edges. We only used 3 representatives from each major dog group:

- *Western Eurasian dogs* - Portuguese village dogs (DEU), German Shepherd (DGS)
- *East Asian dogs* - Vietnamese village dogs (DVN) because they lack admixture from European dogs (see above) and Tibetan village dogs (DTI)
- *Pre-contact dogs* (PCD), including both Port au Choix (AL3194) and Weyanoke Old Town (AL3223; Table S1)
- *Arctic dogs* - Malamute (DMA) and Greenland dogs (DGL) because they seem least admixed with Western dogs (see above) and
- *CTVT* - (79T and 24T)
- *Eurasian wolves* (WEU) from Spain and Portugal
- *North American wolves* (WAM) from Yellowstone
- *Coyotes* (COY) as an outgroup

We only used transversions in order to limit the effect of DNA damage on the analysis and only used sites that were covered in all samples (~60,000 SNPs).

The results of these analyses are presented in Figure S21, Figure S22, Figure S23 and Figure S24. The placement of the East Asian dog (DVN) population was affected by



adding admixture edges (Figure S22, Figure S23). With two admixture edges DVN outgroup PCD/CTVT and Arctic dogs but has strong admixture into DTI. This support results from our D-statistics analysis (Table S7) and NJ analysis (Figure S10; Figure S11) that suggests that DTI is mixed with European ancestry. We also found evidence for European ancestry in Arctic dogs, supporting our D-statistics analyses (Table S4). Lastly we also found admixture from COY into PCD/CTVT, consistent with D-statistics (Figure S16).

#### *qpGraph*

We used *qpGraph* (161) to fit admixture graphs to nine populations representing PCD, CTVT, and each of the three major dog groups, plus wolves and coyotes.

- *Western Eurasian dogs* - Portuguese village dogs (DEU)
- *East Asian dogs* - Vietnamese village dogs (DVN)
- *Pre-contact dogs* (PCD), including both Port au Choix (AL3194) and Weyanoke Old Town (AL3223; Table S1)
- Canine transmissible venereal tumor (CTVT), including C\_24T, C\_79T and C\_399T
- *Arctic dogs* - Alaskan malamute (DMA)
- *Eurasian wolves* (WEU) from Spain and Portugal
- *North American wolves* (WAM) from Yellowstone
- *Coyotes* (COY) from California
- *Andean Fox* (OUT) as the outgroup

We only used transversions in order to limit the effect of DNA damage on the analysis. This resulted in 600,991 high quality SNPs.

To explore the space of all possible admixture graphs we implemented a heuristic search algorithm. Given an outgroup with which to root the graph, a stepwise addition order algorithm was used for adding leaf nodes to the graph. At each step, insertion of a new node was tested at all branches of the graph, except the outgroup branch. Where a node could not be inserted without producing f4 outliers (i.e.  $|Z| \geq 3$ ) then all possible admixture combinations were also attempted. If a node could not be inserted via either approach, that sub-graph was discarded. If the node was successfully inserted, the remaining nodes were recursively inserted into that graph. All possible starting node orders were attempted to ensure full coverage of the graph space.

As the number of possible graphs grows super-exponentially with each additional leaf node, we initially excluded CTVT from the search space and looked for models with fit the remaining eight populations. We fitted 480,166 unique admixture graphs for these 8 populations and recorded the 892 graphs that left no f4 outliers (i.e.  $|Z| < 3$ ). We then fitted a further 309,525 unique models, testing all possible insertions of CTVT into the 892 eight-population graphs, and recorded the 1,655 graphs that left no f4 outliers.

Treemix analysis was also performed using the same nine populations, with six admixture edges (the maximum number seen in the *qpGraph* analyses). We chose the

most plausible qpGraph model (Figure S25) by comparing all fitted models to the Treemix tree with the same sampling (Figure S26), Neighbour joining tree (Figure S10), Bayesian tree (Figure S12) and D-statistics analyses (see above).

### Phenotypic information

Considering the evidence of introgression between wild North American canids into the pre-contact domestic dog population (Table S3), we assessed the presence of a marker associated with melanism, which has introgressed from dogs into North American gray wolves and coyotes, in the higher coverage PCD genomes (Port du Choix sample: AL3194, ~2x; Weyanoke old town sample: AL3223, ~0.5x). We found no evidence for the CBD103<sup>ΔG23</sup> / K<sup>B</sup> mutation in either of these samples.

### CTVT Mutation rate analysis

#### *Overall rationale*

Our goal was to estimate a lower bound for the CTVT somatic mutation rate and to use this to estimate an upper range for the time at which CTVT originated. To do this, we collected biopsies from a pair of CTVT tumors involved in a naturally occurring direct transmission event, and identified mutations that had arisen during the known transmission time interval to define a somatic mutation rate. We then estimated the number of somatic mutations in the entire CTVT lineage and applied our somatic mutation rate to estimate the time of CTVT origin.

Previous estimates of CTVT time of origin have relied on microsatellite mutation rates in mammalian germlines (166, 167), or mutation rates in human cancer (20). These have led to estimates of 250 to 2,500 years since the most recent common ancestor of a group of globally dispersed tumors (166), or 6,500 to 65,000 years (167) and 10,179–12,873 years (20) since the origin of CTVT.

#### *Case histories*

Dog 609 was a mixed-breed free-ranging dog from the Gambia with an approximately 31cm<sup>3</sup> vaginal CTVT tumor. Her ten-month-old male puppy, Dog 608, had several CTVT tumors on the ventral skin. This unusual CTVT presentation in Dog 608 suggested that CTVT cells may have transmitted from mother to puppy during parturition.

#### *Samples*

This project was approved by the Department of Veterinary Medicine, University of Cambridge, Ethics and Welfare Committee (reference CR174). A 1-2 mm<sup>3</sup> biopsy was sampled from Dog 609's vaginal tumor (609T). A 1-2 mm<sup>3</sup> biopsy was sampled from one of Dog 608's skin tumors on the same day (608T). Biopsies were also collected from host tissues (ovary (609H) or testis (608H)). Genomic DNA was extracted using the Qiagen DNeasy Blood and Tissue extraction kit (Qiagen, Hilden, Germany). CTVT diagnosis was confirmed as previously described (21). Whole genome sequencing libraries were prepared with insert size 450 bp and sequenced with 150 bp paired end reads using the Illumina HiSeq X Ten platform (Illumina, San Diego, CA). Reads were aligned to CanFam3.1 using BWA-MEM (130). Average sequencing depth is reported in Table S2.

## *Variant Calling*

### *Variant extraction and filtering*

We used Somatypus (<https://github.com/baezortega/somatypus>), a Platypus (168) based variant calling and genotyping pipeline, to identify SNVs and small insertions and deletions (indels). In order to make an initial call, SNVs were required to have  $\geq 3$  supporting reads in at least one of the four sequenced samples (608T, 608H, 609T, 609H). Indels were inputted to GATK Realigner Target Creator (169) for local realignment and SNVs were re-called from realigned genomes.

The following in-built Platypus flags were used to exclude SNVs at two stages, before and after genotyping: badReads, MQ, QD, strandBias, SC.

The following post-processing filters were also implemented:

- *Strand bias filter*. For each SNV, the total coverage, as well as forward and reverse strand read support were extracted. For low total coverage positions ( $\leq 10$  reads across all four samples), we discarded calls with less than two supporting reads in either forward or reverse direction. For high total coverage positions ( $> 10$  reads across all four samples), we discarded calls with less than 20% support on either the forward or reverse sequencing strands.
- *Simple repeat filter*. SNVs within simple repeats, as defined by the UCSC table browser (CanFam3.1), were excluded.
- *Extreme depth filter*. SNVs within regions of high read depth were also excluded. To detect high read depth (HRD) regions we first generated BigWig coverage files from matched normal whole genome sequence data files (608H, 609H). We then identified areas with coverage 12 standard deviations higher than the mean read coverage, on a chromosome by chromosome basis. Common intervals between normal samples were identified using bedtools multiinter (138) and were merged using bedtools merge. The maximum allowed distance between regions to be merged was 250 bp. HRD regions spanning less than 500 bp were excluded. Any HRD region that overlapped with gene regions as defined by the UCSC table browser (CanFam3.1, Genes and Gene Predictions, Ensembl Genes) was excluded.
- *Low VAF filter*. SNVs with  $VAF > 0$  and  $VAF < 0.2$  in both 608H and 609H were discarded if (i) they were not detected in 608T or 609T or (ii) they were found with  $VAF > 0$  and  $VAF < 0.1$  in either or both of 608T and 609T.
- *Regions filter*. SNVs occurring in the mitochondrial genome or on unassigned scaffolds were excluded. In addition, to avoid problems caused by variable coverage in hosts, SNV analysis was restricted to autosomes.

### *Germline and consensus filtering*

SNVs identified in 608T and 609T will belong to one or more of the following categories:

- (i) Contaminating germline SNVs from matched host
- (ii) Germline SNVs inherited by the CTVT founder dog
- (iii) Somatic mutation SNVs

In order to enrich for somatic mutations, we filtered our candidate SNVs against a panel of 28,812,954 canid germline SNVs. Specifically, we excluded any genomic site that was reported in any of the following variant catalogues:

- 608H and 609H (sites with  $\geq 5$  reads coverage and  $\geq 2$  reads supporting a non-reference allele were considered SNVs)
- The Variant and Systematic Error Catalogue (VSEC) (170)
- The CanineHD 170K SNP array (171)
- The ascertainment panel generated in this study prior to incorporating CTVT samples (*Genotyping - Ascertainment panel*)
- A complete genome from a Greenland sledge dog (14)(Table S2) included in the ascertainment panel was additionally genotyped. This provided additional SNVs beyond those in the ascertainment panel, as the ascertainment panel excluded SNVs that were found on only one chromosome; thus SNVs that were exclusively found in the Greenland sledge dog individual and CTVT would not have been included in the ascertainment panel that we filtered against (see previous bullet point), but were excluded in this step (*Genotyping - Dog samples*)(14)

Next, we further filtered the remaining SNVs using the following criteria:

- We retained only those SNVs that had that had  $\geq 2$  reads supporting the variant, all with minimum base quality of 20 and minimum mapping quality of 35, in at least one of the two tumors using the alleleCount package (<http://cancerit.github.io/alleleCount/>).
- We retained only those SNVs that were identified by GATK Haplotype Caller. The GATK engine was restricted processing candidate loci.
- We required that the matched host must have coverage of at least 20 reads total at the candidate SNV position. Candidate SNVs that did not reach this threshold in one or both matched hosts were discarded.
- We discarded SNVs where one or both matched hosts had  $\geq 10$  reads total (regardless of whether they supported the variant) with base quality  $< 20$  and mapping quality  $< 35$  in matched hosts

1,934,103 and 1,934,125 “tumor-only” SNVs remained in 608T and 609T respectively after these steps; 1,933,897 of these were shared by 608T and 609T. Of the SNVs in this set that mapped to genomic regions retaining both parental copies, almost all SNVs were heterozygous. Thus, the majority of these SNVs are likely to be somatic; however, some germline variation that was present in the CTVT founder dog, but that is not represented in the germline panel used here likely still remains. It is also likely that some somatic mutations, which occurred in the same sites as germline SNVs represented in our panel, have been removed.

#### *Tumor-unique SNVs*

We next filtered tumor-only SNVs, as defined above, for those unique to either 608T or 609T. In order to be considered unique to a single tumor, a variant was required to be present with  $\geq 2$  supporting reads in only one tumor, with minimum base quality of 20 and minimum mapping quality of 35 for those reads supporting the variant.

This method yielded 206 tumor-unique SNVs in 608T and 228 tumor-unique SNVs in 609T.

#### *Mutational spectrum*

Each tumor-only SNV was classified as one of six possible mutation types in the pyrimidine context (C>A, C>G, C>T, T>A, T>C, T>G). The immediate 5' and 3' sequence contexts for each mutation was extracted from the CanFam3.1 dog reference genome (172) yielding 96 mutation types. The mutational spectrum for the 1,933,897, CTVT tumor-only SNVs (shared between 608T and 609T) is shown in Figure S27A.

#### *Mutational signature fitting*

We performed mutational signature fitting in order to estimate the number of mutations contributed by different exposures to the CTVT mutational spectrum.

Validated mutational signatures were obtained from the Catalogue of Somatic Mutations in Cancer (COSMIC; <http://cancer.sanger.ac.uk/cosmic/signatures>) database and renormalized to the CanFam3.1 dog reference genome (172). In addition, we generated a “Dog Germline” signature, from the germline mutational spectrum of a Greenland sledge dog (*Variant calling - Germline and consensus filtering*; Table S2).

Reference (20) previously showed that COSMIC mutational signature 1 (5-methyl-cytosine deamination), signature 5 (unknown etiology), and signature 7 (ultraviolet light exposure) are operative in CTVT, and that these three signatures are sufficient to describe the pattern of somatic substitutions observed in CTVT. We therefore fitted these three signatures, together with the Dog Germline signature (see above), to the CTVT tumor-only mutation spectrum (Table S14; Figure S27B and C). Results are similar to previous findings (20). Signatures were fitted using sigfit (<https://github.com/kgori/sigfit>). Simulations were run using 100 chains with 10,000 iterations each. Importantly, the Dog Germline signature accounted for only 5.5% of the tumor-only SNVs, suggesting that the majority of the SNVs in this set are indeed somatic.

#### *N[C>T]G CTVT tumor-only SNVs*

Mutational signature 1 is largely composed of 5'-N[C>T]G-3' mutations (where N is any base) (<http://cancer.sanger.ac.uk/cosmic/signatures>). Of the 1,933,897 tumor-only SNVs shared by 608T and 609T, 222,072 are N[C>T]G.

#### *Copy-number analysis*

Average mappability and GC-content were generated for the dog reference genome (172) with the generateMap, mapCounter, and gcCounter tools in the HMMcopy package (173). GC content and genomic mappability biases for read counts in non-overlapping 1kb windows were corrected using HMMcopy. Copy number estimation was then performed on GC- and mappability-corrected read counts using a bespoke copy number calling pipeline ([https://github.com/ymk1/cnv\\_pipeline.git](https://github.com/ymk1/cnv_pipeline.git))

Tumor purity in 608T and 609T was evaluated based on the VAF distribution of tumor-only SNVs. Tumor purity was estimated as follows:

$$\text{Purity} = 2 * \text{VAF}_{\text{med}}$$

Where  $\text{VAF}_{\text{med}}$  is the median VAF value of tumor-only SNVs. Using this method, 608T was estimated to be 49.3% CTVT cells and 609T was estimated to be 65% CTVT cells.

#### *Identifying clonal mutations in tumor-unique variant sets*

We categorised tumor-unique SNVs in 608T and 609T as either clonal or subclonal, that is, present in all or a fraction of tumor cells within a sample, respectively. To do this, we first examined the VAF distributions of germline SNPs in 608T and 609T for each copy number (CN) state (CN1, CN2, CN3, CN4, CN6). We used a Gaussian mixture model ( $k = 2$ ), implemented using the R package MCLUST (174), to define VAF clusters for heterozygous and homozygous SNPs. Next, we fitted this model to VAF distributions of tumor-unique SNVs. SNVs that fell below the 5% lower bound were defined as subclonal; all other SNVs were considered clonal. The results of this analysis are shown in Table S15.

#### *N[C>T]G CTVT tumor-unique clonal SNVs*

Of the 183 and 174 clonal mutations identified uniquely in 608T and 609T respectively, 27 and 23 were N[C>T]G in 608T and 609T respectively. 26/27 and 21/23 (609T) were validated using read alignment visualisation.

#### *CTVT mutation rate*

We have determined that 608T and 609T acquired 183 and 174 clonal mutations, and 27 and 23 clonal N[C>T]G mutations respectively since they diverged from their most recent common ancestor (MRCA).

In order to estimate the CTVT mutation rate, we need to know the time intervals during which the clonal tumor-unique mutations arose in 608T and 609T. These time intervals ( $i_{608T}$  and  $i_{609T}$ ) correspond to:

$$i_{608T} = t_{MRCA-608T} - t_{MRCA-608T/609T} \quad \text{and} \quad i_{609T} = t_{MRCA-609T} - t_{MRCA-608T/609T}$$

where  $t_{MRCA-608T}$  and  $t_{MRCA-609}$  are time-points defining the MRCA cells of 608T and 609T respectively, and  $t_{MRCA-608T/609T}$  is the time-point defining the MRCA cell of both 608T and 609T.

We assumed that  $t_{MRCA-608T/609T}$  occurred during 609T tumor development; i.e. the clones that spawned the sampled 608T and 609T biopsies diverged in the period after infection of Dog 609 (the mother) but before transmission to Dog 608 (the son). Thus, the earliest time-point for  $t_{MRCA-608T/609T}$  would coincide with the time at which Dog 609 (the mother) was infected with CTVT, i.e. month 0.

We assumed that Dog 609 was infected during the heat cycle in which she conceived the puppy, Dog 608. Although we cannot be certain that this assumption is

valid, we observed that Dog 609's tumor appeared to be of a similar size to Dog 608's tumor. Unless CTVT tumors have large variation in growth rate, we believe that it is unlikely that Dog 609 was infected with CTVT in the heat cycle previous to that in which she conceived Dog 608. Given that the gestation period in domestic dogs can range from 57-72 days (175–177), we estimated that Dog 609 was infected with CTVT approximately 2 months prior to when her son, Dog 608, was born and infected. This implies that the latest time-point for  $t_{MRCA-608T/609T}$  is 2 months after Dog 609 was infected with CTVT. Thus  $t_{MRCA-608T/609T} = 0$  to 2 months, defining month 0 as the month at which Dog 609 (the mother) was infected with CTVT.

Assuming no polyclonal seeding,  $t_{MRCA-608T}$  either occurred within Dog 608, or was the cell that transmitted from Dog 609 to Dog 608, and thus  $t_{MRCA-608T} = 2$  to 12 months, where month 0 is the month at which Dog 609 (the mother) was infected with CTVT, and 12 months corresponds to the time of sampling.

$t_{MRCA-609T}$  could have occurred at any time during 609T tumor development. Thus  $t_{MRCA-609T} = 0$  to 12 months, where month 0 is the month at which Dog 609 (the mother) was infected with CTVT, and 12 months corresponds to the time of sampling.

Thus, we estimate both  $i_{608}$  and  $i_{609}$  to be 0 to 12 months.

We determined that 608T and 609T had acquired 183 and 174 mutations since their divergence from their MRCA ( $MRCA_{608T-609T}$ ) and before the MRCA of the clone biopsied in 608T ( $MRCA_{608T}$ ) and the MRCA and the clone biopsied in 609T ( $MRCA_{609T}$ ). These mutations will likely have arisen as part of clock-like ageing-associated mutational signatures 1 and 5 and possibly as part of mutational signature 7 (exposure to ultraviolet light). Signature 1 mutation rate is believed to be highly dependent on cell division (178). Due to the small number of tumor-unique mutations, signature fitting cannot give us an accurate estimate of the respective contributions of these signatures to tumor-unique SNV sets. As mutational signature 1 is largely composed of N[C>T]G mutations (where N is any base), we used N[C>T]G as a proxy for signature 1. Table S16 shows the number of N[C>T]G mutations unique to 608T and 609T, as well as the number found in the somatic lineage from the CTVT founder dog until  $MRCA_{608T-609T}$ .

As 608T harbours more clonal N[C>T]G mutations than 609T (Table S16), we infer that  $MRCA_{608T}$  existed more recently than  $MRCA_{609T}$ . Assuming that  $i_{608T}$  is up to 12 months (see above), then the slowest rate at which N[C>T]G mutations accumulate is 27 N[C>T]G mutations / year or 12.56 N[C>T]G mutations / Gigabase (Gb) / year, using the callable dog genome size (excluding simple repeats and regions of high read depth) of 2.15 Gb (172). Applying this rate to the whole lineage (222,072 N[C>T]G mutations across the callable genome ~ 2.15 Gigabase pairs, see above), we obtain an upper bound of 8,225 years for the origin of CTVT. Our method cannot directly infer an upper bound for the CTVT mutation rate, and hence a lower bound for the age of CTVT. However, assuming that the disease described by Blaine in 1810 (179) was indeed CTVT, then CTVT must have arisen at least 200 years ago.

### *Comparison with mutation rates in human cancer*

Signature 1 mutation rate varies between human cancer tissue types(178). The mutation rate lower bound that we have derived for CTVT N[C>T]G mutations (>12.56 mutations / Gb / year) is comparable to the N[C>T]G mutation rates found in human cancers(178). Cervical cancer was reported to have the highest estimated rate of accumulation of N[C>T]G somatic mutations of 36 human cancer types (16.61 N[C>T]G somatic mutations / Gb / year)(178). Applying the cervical cancer N[C>T]G mutation rate to the CTVT lineage would provide an estimate of 6,195 years since CTVT origin.

### *Limitations of the approach*

The approach to deriving the CTVT mutation rate that we have presented here is based on a number of assumptions. These are outlined below.

- *No polyclonal seeding.* We have discounted the possibility of polyclonal seeding of Dog 609's tumor. If polyclonal seeding occurred, then  $t_{MRCA-608T/609T}$  may have existed in Dog 609 tumor's donor, rather than in Dog 609's tumor itself. If this is the case, then the mutation rate would be slower, leading to older estimates for CTVT time-of-origin.

- *Age of Dog 608.* Dog 608 was estimated to be ten months old at the time of sampling. Given that Dog 609 was approximately 14 days pregnant at the time of sampling, and given that dogs have heat cycles every six months, we believe that Dog 608's age estimate is likely accurate. However, an inaccurate age estimate could affect our mutation rate estimates.

- *Time of infection of Dog 609.* We assumed that Dog 609 (the mother) was infected with CTVT at the time of the heat cycle during which she conceived Dog 608. However, if Dog 609 was in fact infected with CTVT during a previous heat cycle, then  $t_{MRCA-608T/609T}$  may have existed at an earlier time point: this would lead to estimation of a slower mutation rate and older estimates for CTVT time-of-origin.

- *Estimation of total mutation burden.* We estimated the total mutation burden by filtering against a large panel of variation in normal dogs (see *Germline and consensus filtering*). If our set of tumor-only SNVs (see section *tumor-unique SNVs* above) is substantially over-filtered (i.e. somatic mutations were removed as they occur at the same site as germline SNVs), then CTVT could have arisen earlier than our estimates suggest. If, on the other hand, substantial numbers of germline SNVs remain in the set of total mutations, then we may have over-estimated the time of CTVT origin.

- *Back-mutation.* We discounted back-mutation as a significant factor in our estimates.

- *Mutation false discovery rate.* The expected proportion of false positive SNVs should be the same in the tumor-unique and tumor-only variant sets as we have used the same filters in both cases. Thus, this is unlikely to have substantially affected estimates.

- *Mutation opportunity and variable mutation rate.* We have discounted the effects of variable mutation opportunity from our estimates. Mutation opportunity may change over time due to (i) altered DNA methylation or chromatin states; (ii) decrease in number of available NCG sites over time; (iii) copy number alterations. Furthermore, although N[C>T]G is usually considered constant, a recent study has detected germline mutations in the *MBD4* gene which alter the rate of signature 1 mutation accumulation



(180). As we detected a number of mutations in MBD4, we cannot exclude the possibility that somatic alteration of this or other loci in CTVT may have caused variation in the rate of N[C>T]G mutation accumulation.

- *Sampling error.* We based our estimates of the CTVT mutation rate on one observation and did not account for sampling variation. Future studies can address this by measuring mutations in additional CTVT time intervals.

Despite these limitations, our analysis provides a plausible estimate of CTVT somatic mutation rate, and is comparable with clock-like mutation rates observed in some human cancers (178).

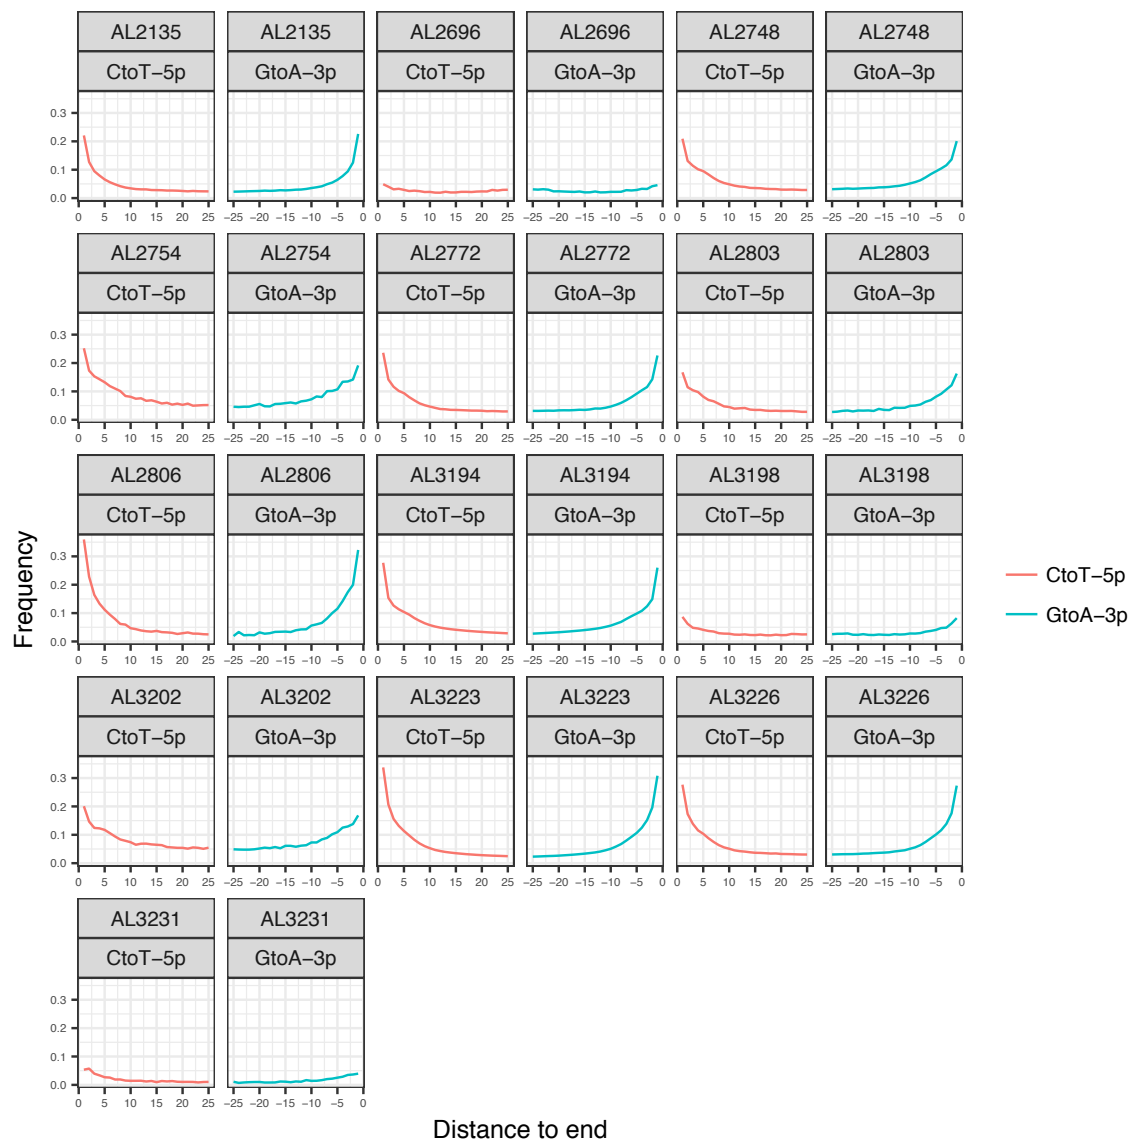

**Fig. S1.**

Per library C to T (red) and G to A (blue) frequency of mis-incorporation at 3' and 5' end of read for samples used in nuclear genome analyses.

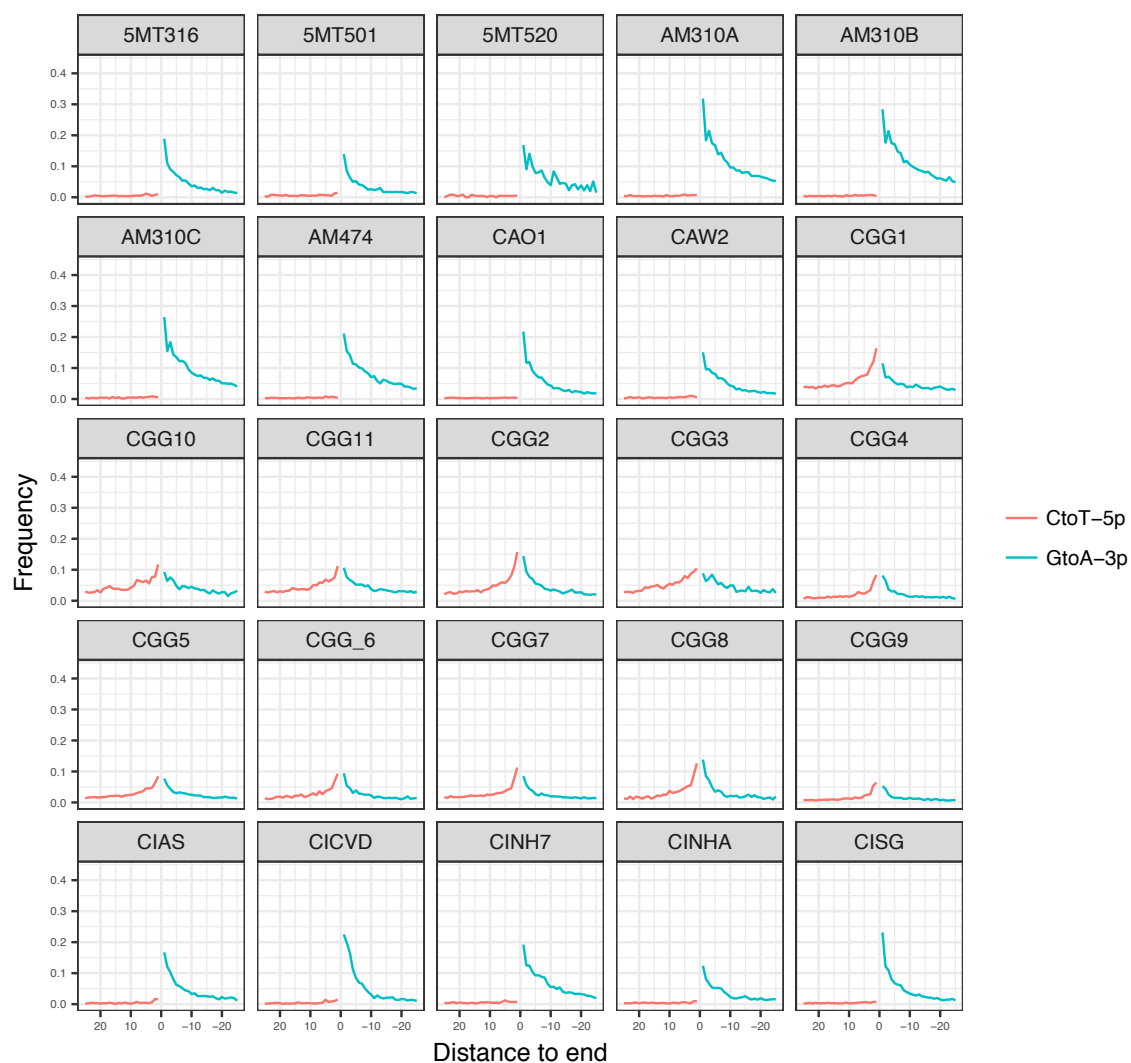

**Fig. S2**

Per library C to T (red) and G to A (blue) frequency of mis-incorporation at 3' and 5' end of read for samples used in mtDNA analyses. Lack of 5' damage in some libraries is due to library preparation protocol (see Ancient DNA - Illinois section).

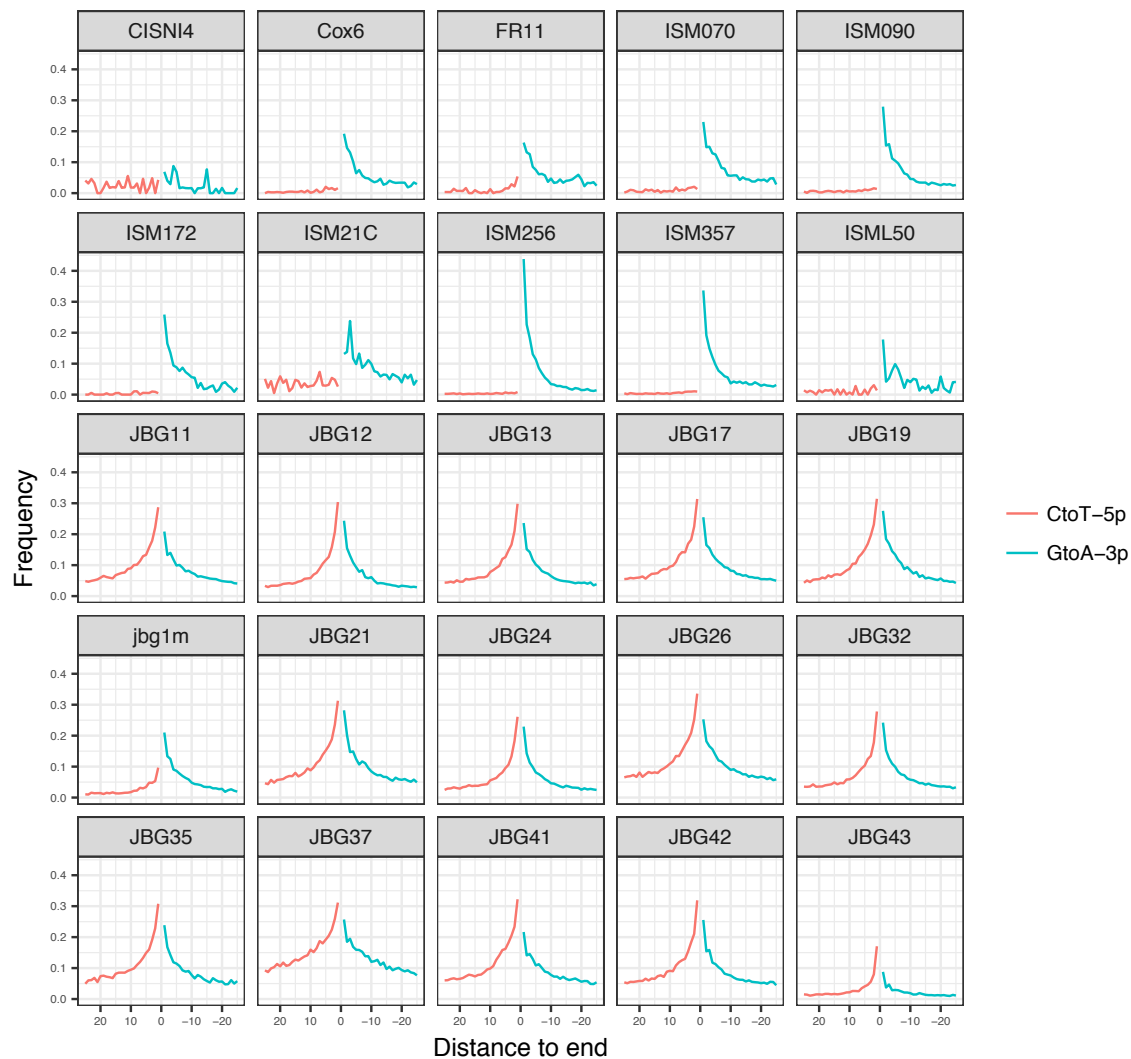

**Fig. S2 (continued)**

Per library C to T (red) and G to A (blue) frequency of mis-incorporation at 3' and 5' end of read for samples used in mtDNA analyses. Lack of 5' damage in some libraries is due to library preparation protocol (see Ancient DNA - Illinois section).

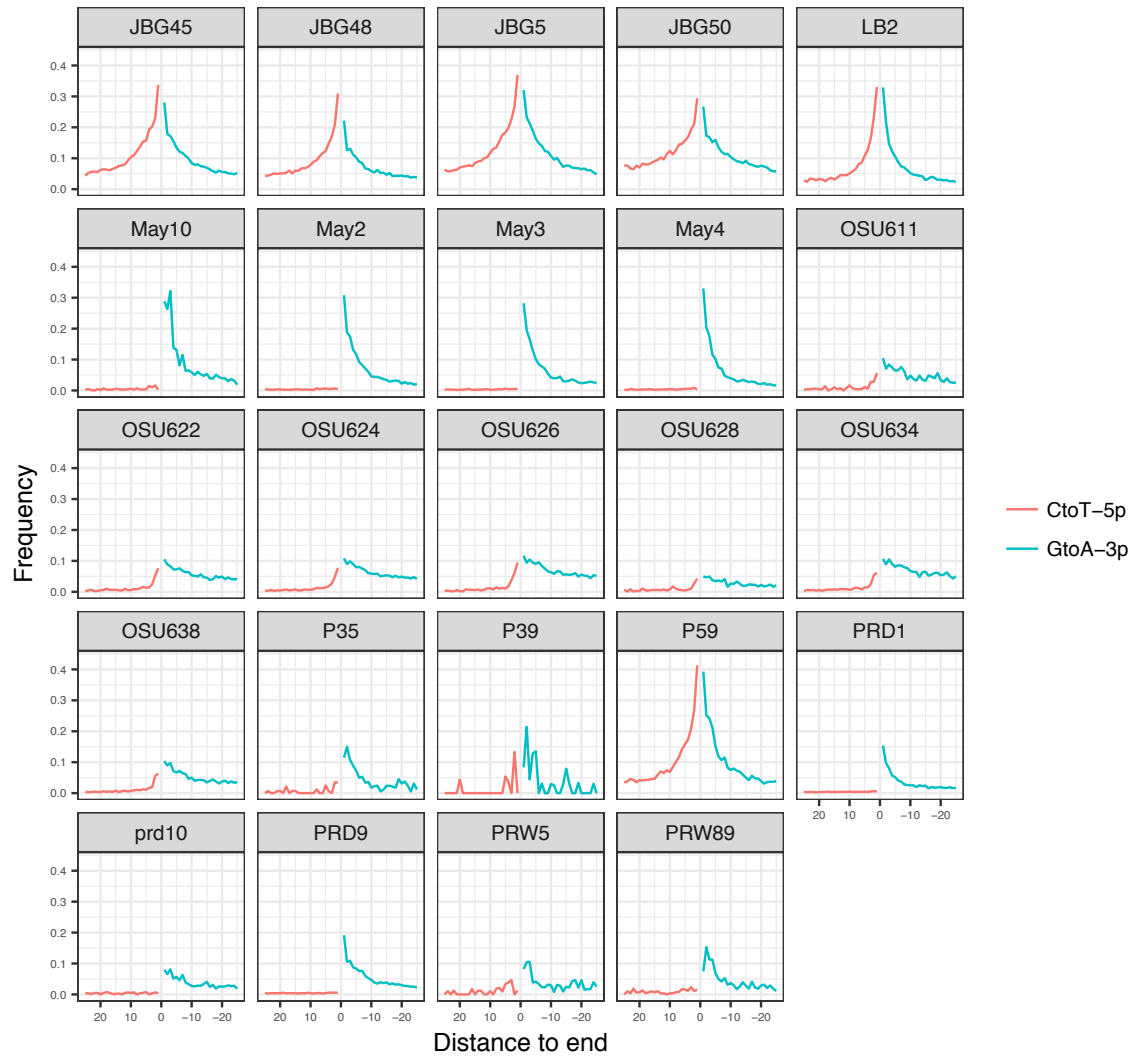

**Fig. S2 (continued)**

Per library C to T (red) and G to A (blue) frequency of mis-incorporation at 3' and 5' end of read for samples used in mtDNA analyses. Lack of 5' damage in some libraries is due to library preparation protocol (see Ancient DNA - Illinois section).

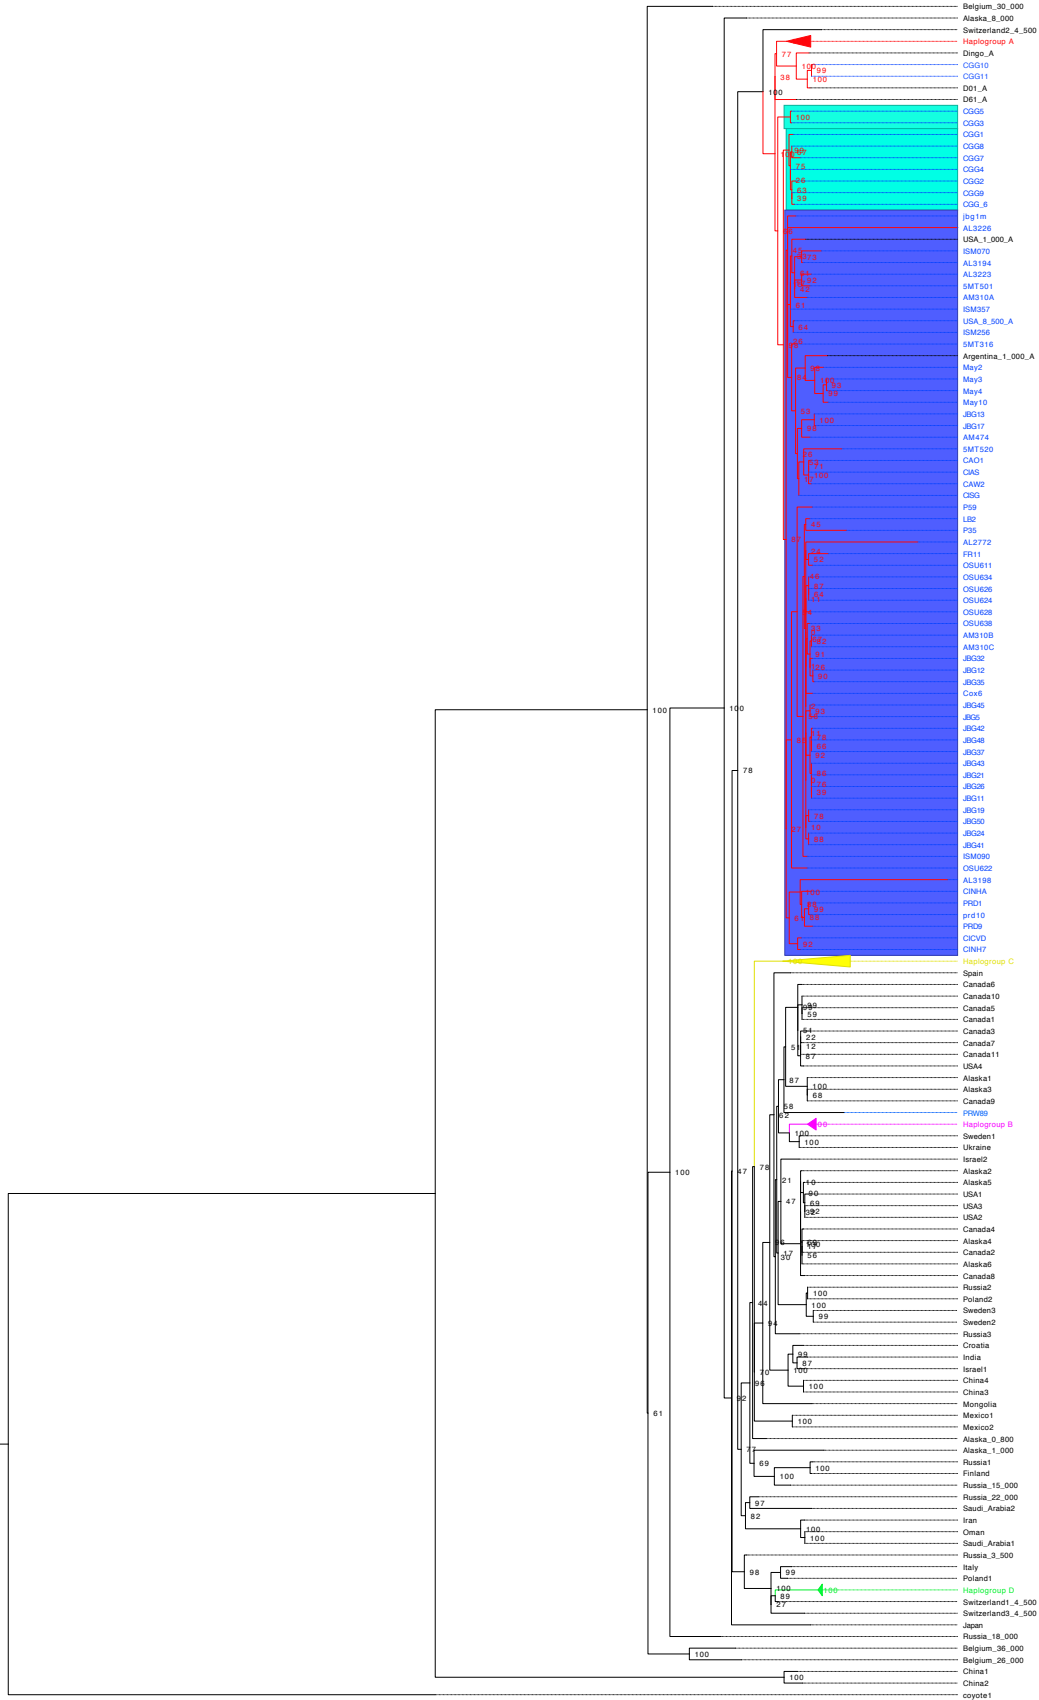

0.0050

**Fig. S3**

Maximum likelihood tree based on mtDNA data. The four major dog haplogroups are indicated: A (red; includes all but one pre-contact dogs), B (purple), C (yellow), D (green). Blue tip label represent newly sequenced samples (this study). Dark blue highlighted clade represents American dogs (monophyletic, bootstrap support value=87). Light blue highlighted clades (CGG1-10) represent Zhokhov Island samples (~9Kya sled dogs from Eastern Siberia; see Table S1). CGG10-11 (outside of the Zhokhov / pre-contact clade) are more recent sled dogs from Siberia (~1.5kya; Table S1). Node labels indicate bootstrap replicates.

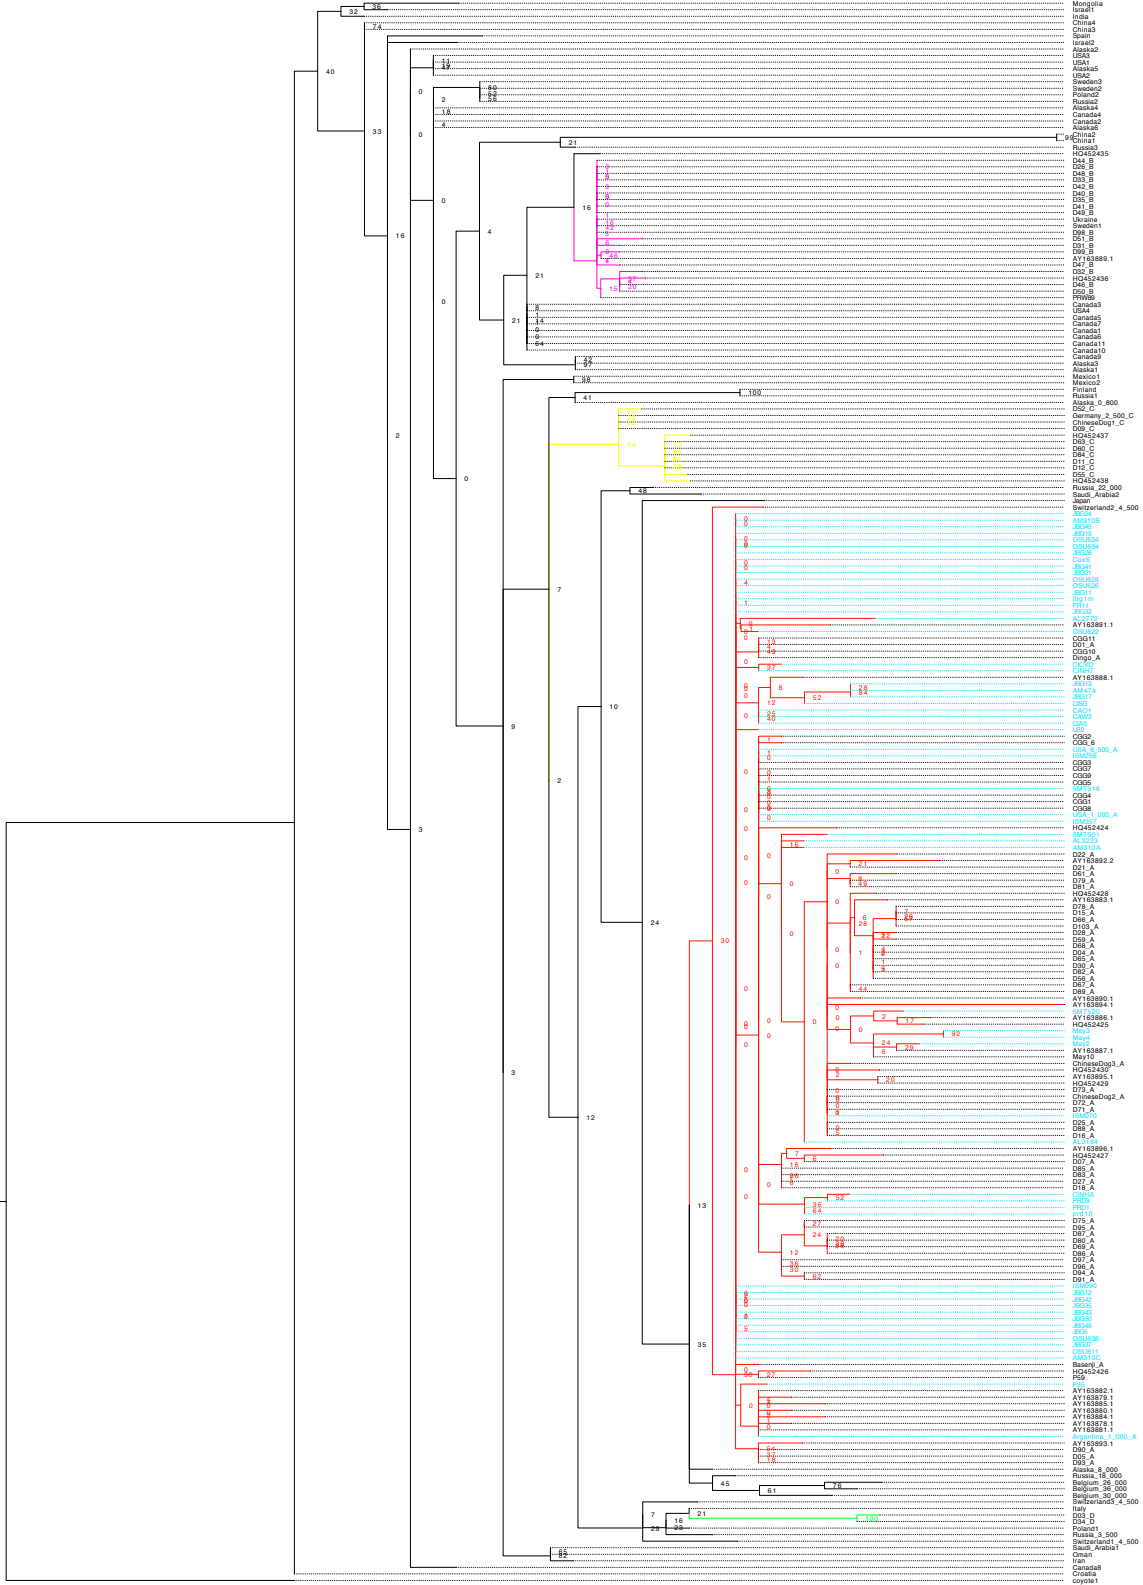

0.02



**Fig. S4**

Maximum likelihood tree based on 605bp of the control region. All samples starting with prefix HQ were obtained from (5) while all samples starting with prefix AY were obtained from (8). The four major dog haplogroups are indicated with different branch colours: A (red; includes all but one pre-contact dogs), B (purple), C (yellow), D (green). All pre-contact dogs from this study are highlighted in light blue. Node labels indicate bootstrap replicates.

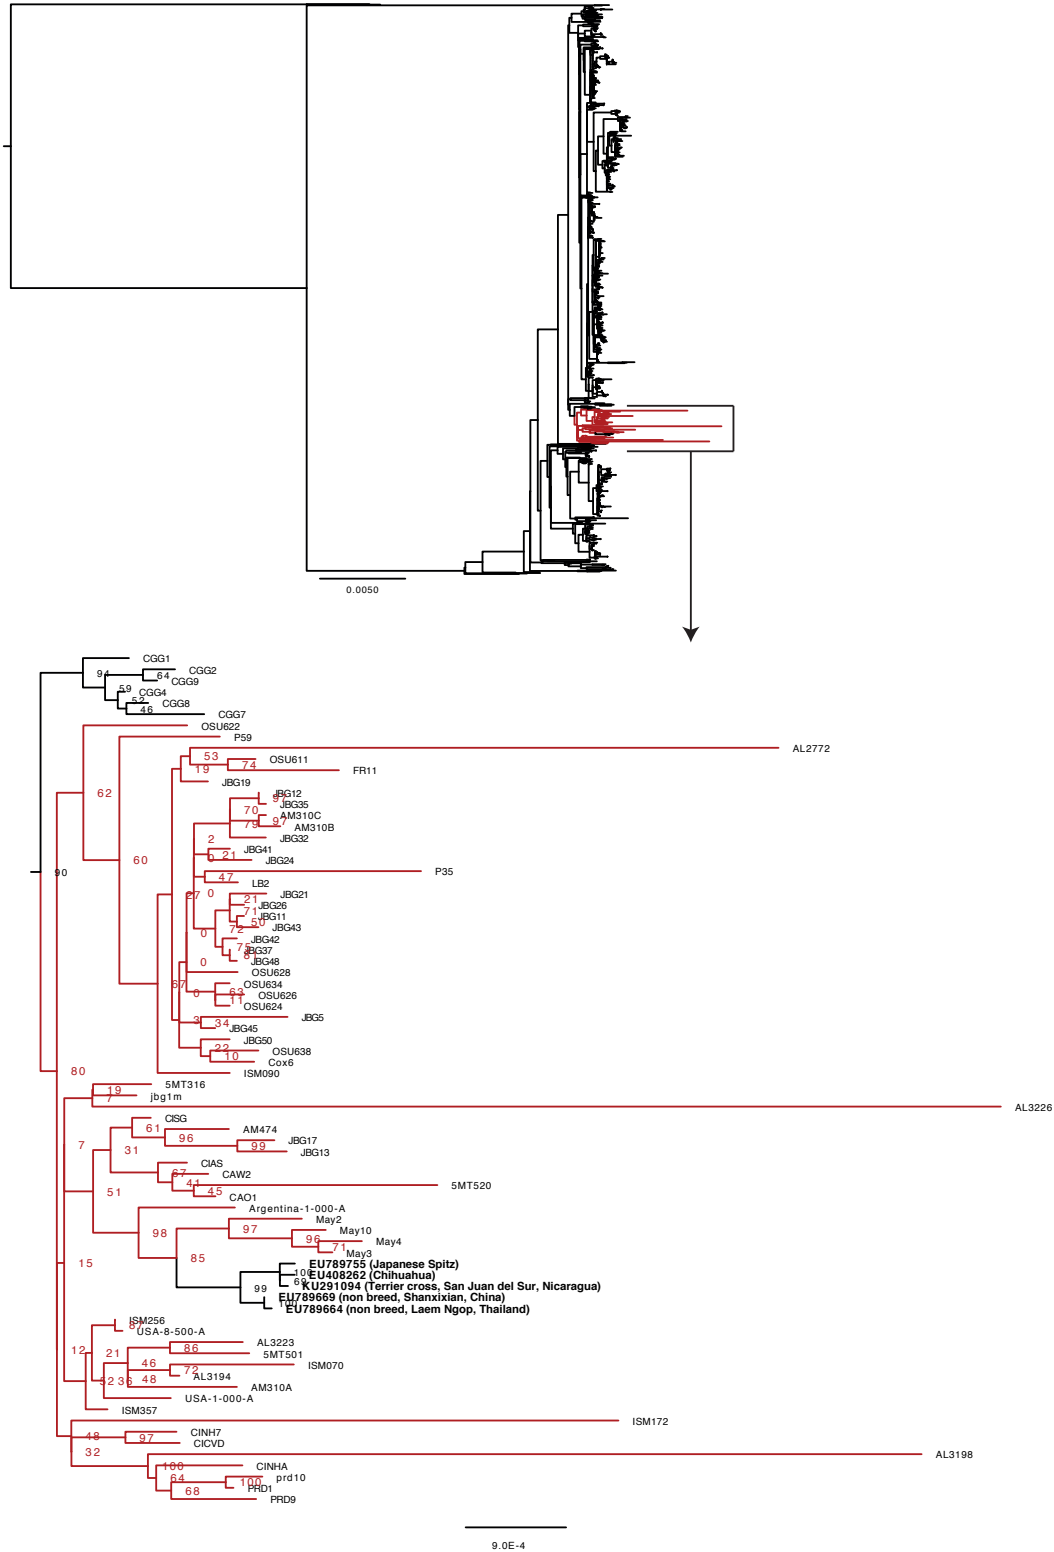

**Fig. S5**

Maximum likelihood tree based on mtDNA data including data from (150–155). Red branches represent ancient pre-contact dogs. Node labels indicate bootstrap replicates.

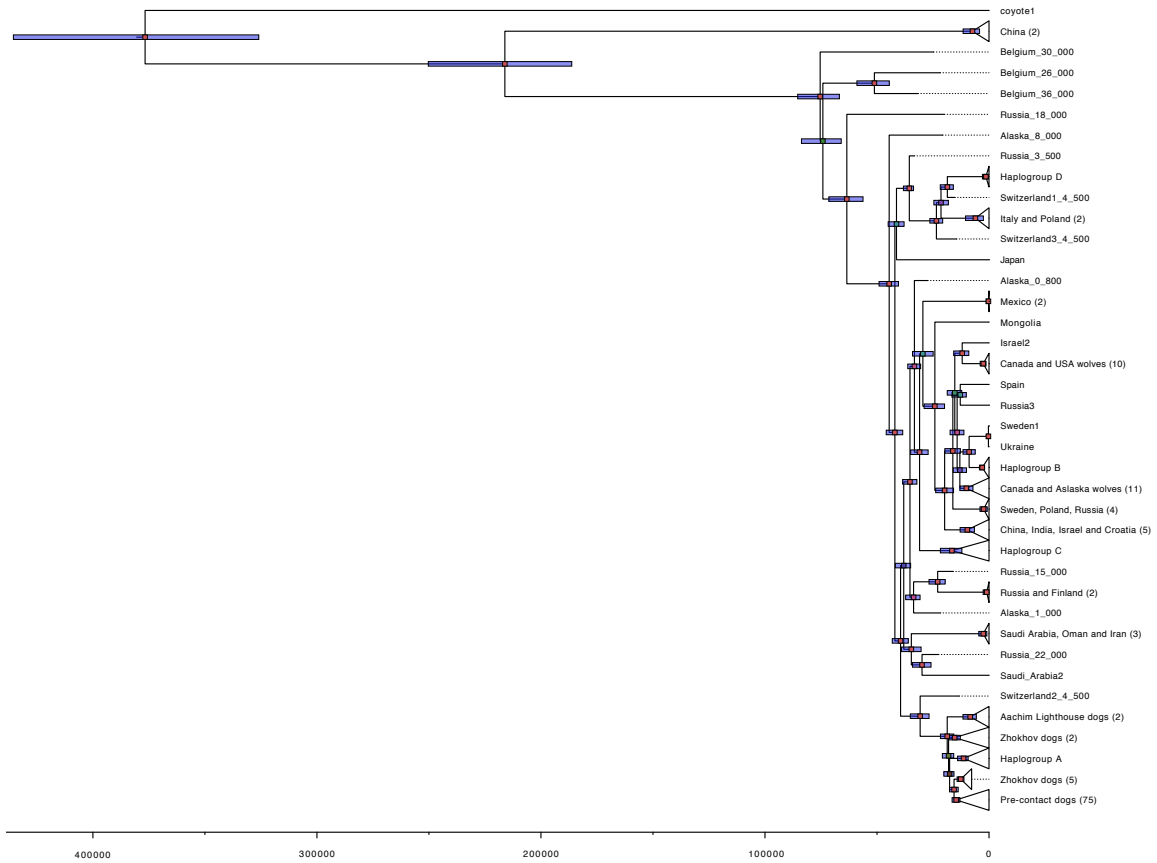

**Fig. S6**

Bayesian tree (*BEAST*) of mtDNA data. Red, purple and green circle represent nodes with  $>0.9$ ,  $>0.7$  and  $>0.5$  posterior probability respectively. Blue bar represent confidence interval of divergence time (scaled in year before present).

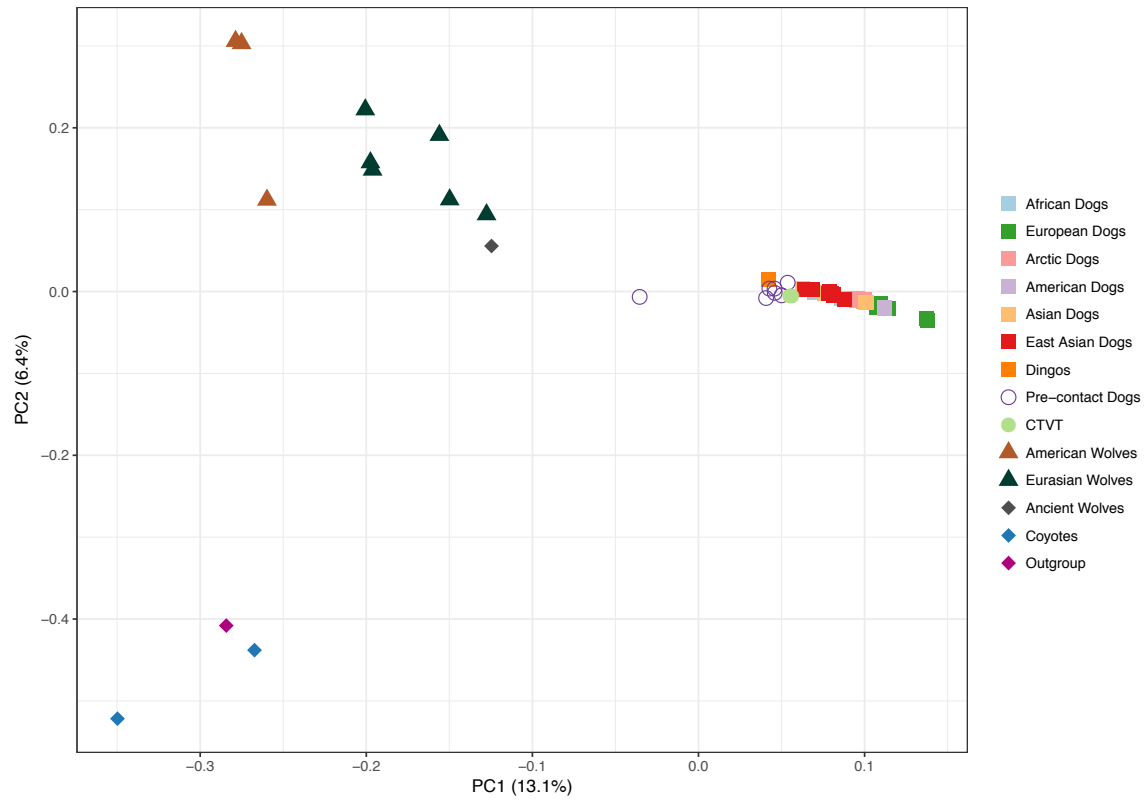

**Fig. S7**

Principal Components Analysis (PC1 versus PC2) of 57 canid samples (including wolves and coyotes) based on 2,063,129 SNPs ascertained using the genome-wide data-set. All pre-contact dog samples were projected.

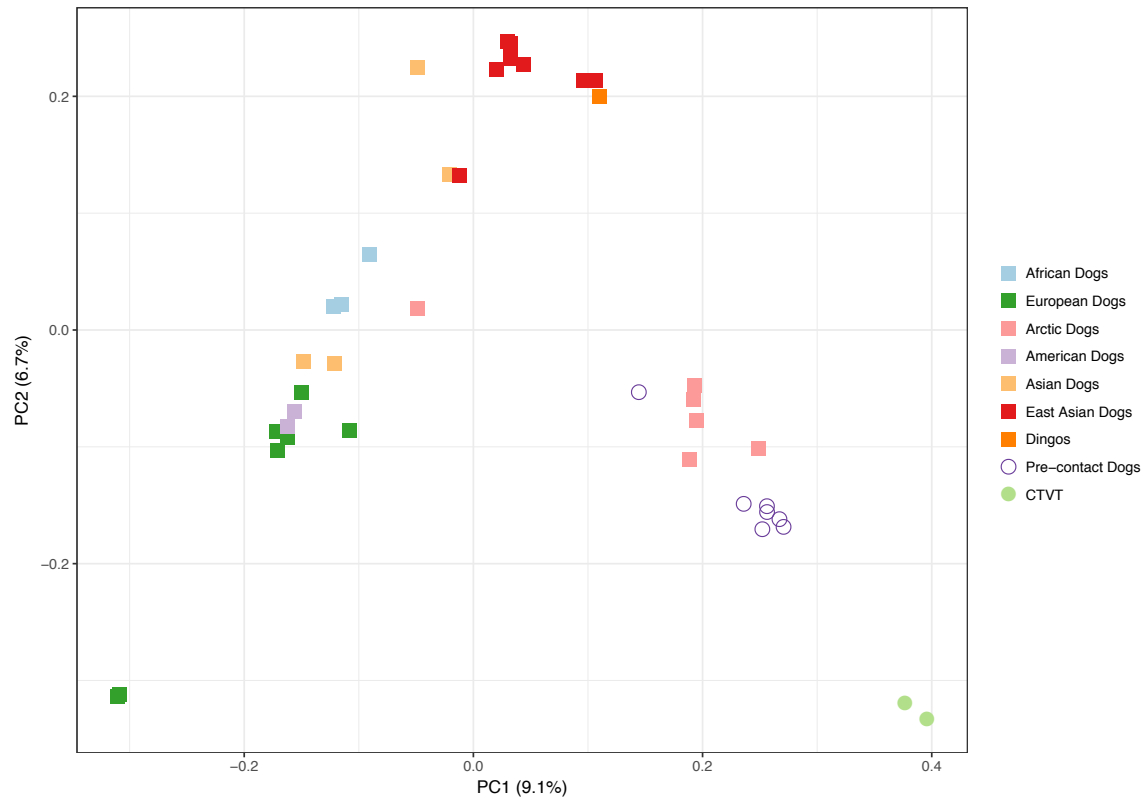

**Fig. S8**

Principal Components Analysis (PC1 versus PC2) of 44 dog samples (excluding wolves and coyotes) based on 2,063,129 SNPs ascertained using the genome-wide data-set. All pre-contact dog samples were projected.

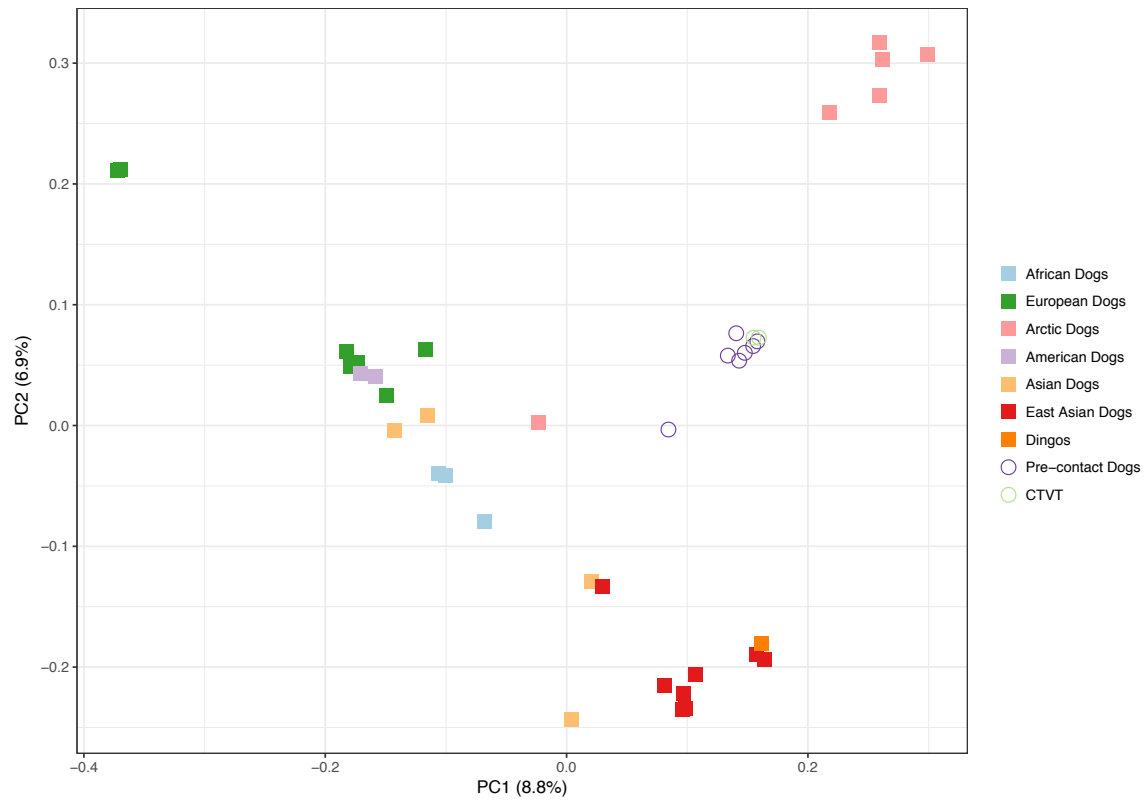

**Fig. S9**

Principal Components Analysis (PC1 versus PC2) of 44 dog samples (excluding wolves and coyotes) based on 2,063,129 SNPs ascertained using the genome-wide data-set. All pre-contact dog and CTVT samples were projected.

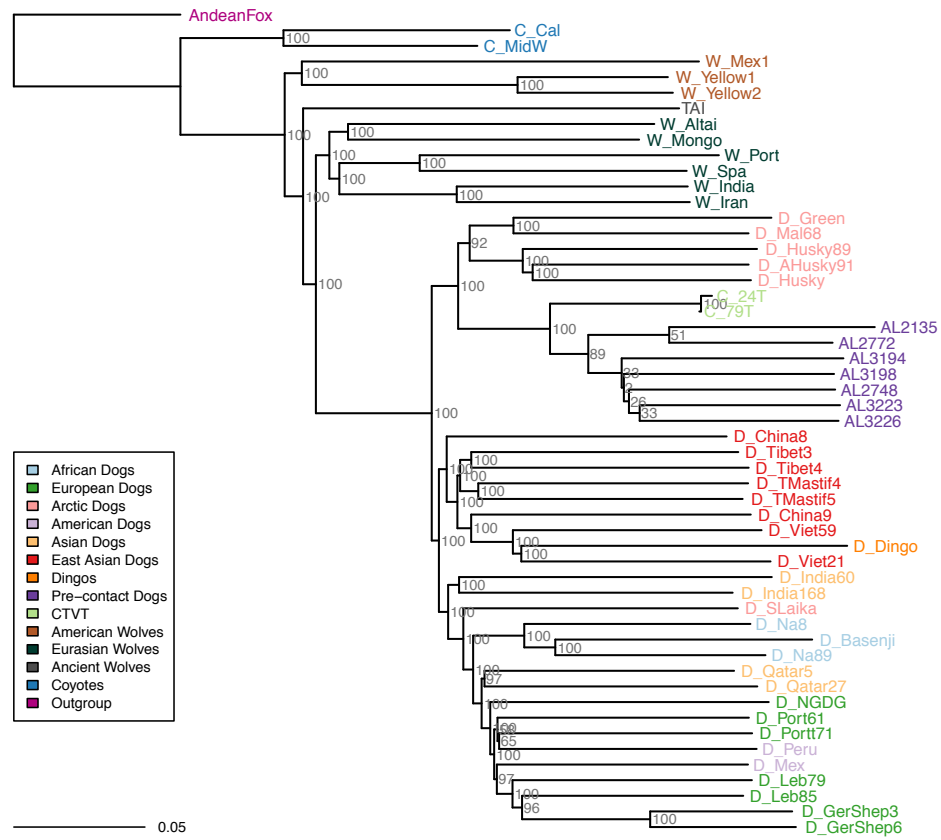

**Fig. S10**

Neighbour Joining (NJ) tree based on Identity By State (IBS). This figure is the same as in Figure 1c. Confirms that CTVT is more closely related to pre-contact dogs than any other dog population. Confirms that PCD form a monophyletic clade.

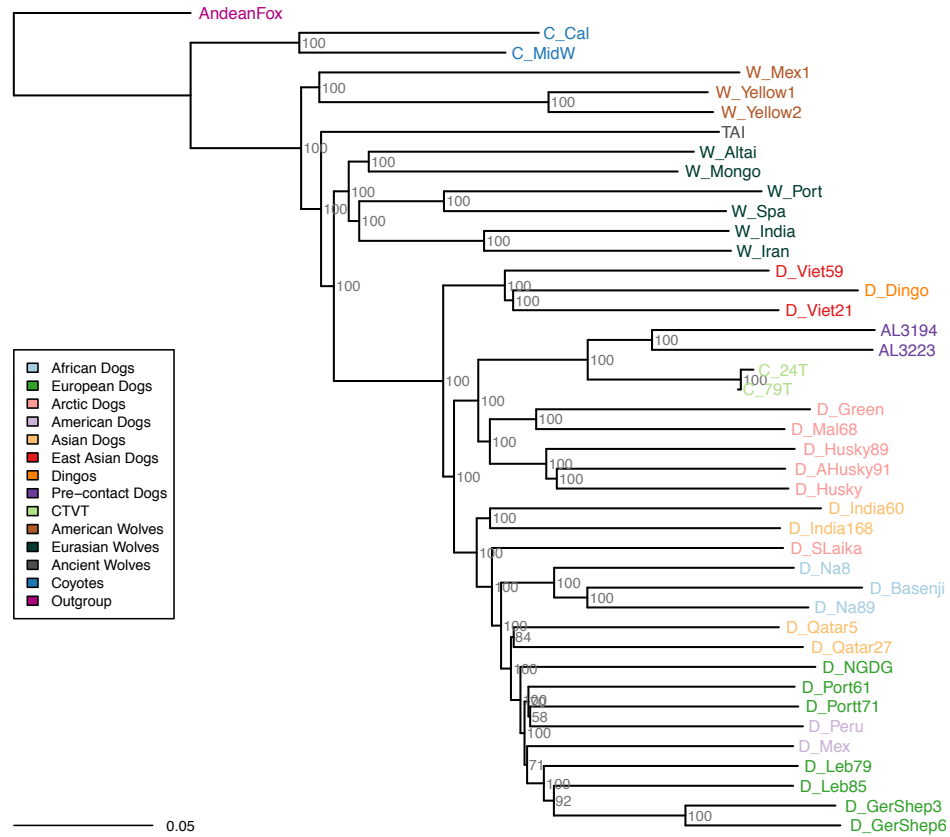

**Fig. S11**

Neighbour Joining (NJ) tree based on Identity By State (IBS). Same as Figure S3 but without East Asian dogs that are admixed with European dogs i.e. excluding all East Asian dogs except Vietnamese. PCD, Arctic dogs and CTVT founder now appear more closely related to Western dogs.



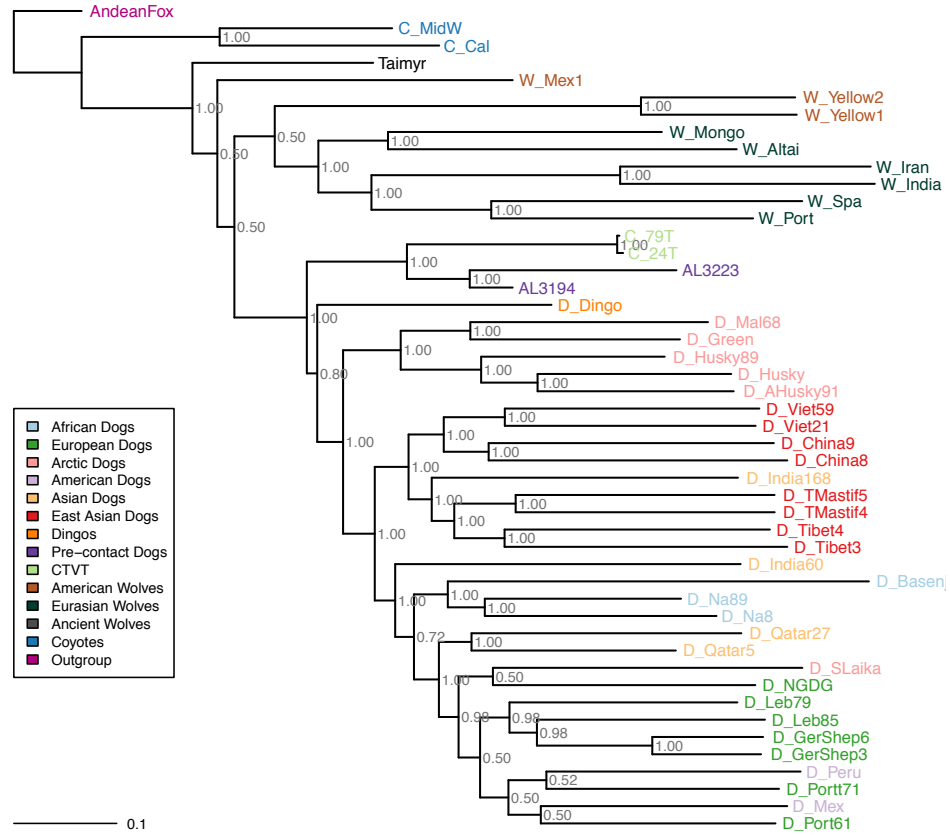

**Fig. S12**

Bayesian tree based on ~26K transversions. Confirms that CTVT and PCD are monophyletic with high support and supports the basal placement of the CTVT/PCD clade. Support values represent posterior probability.

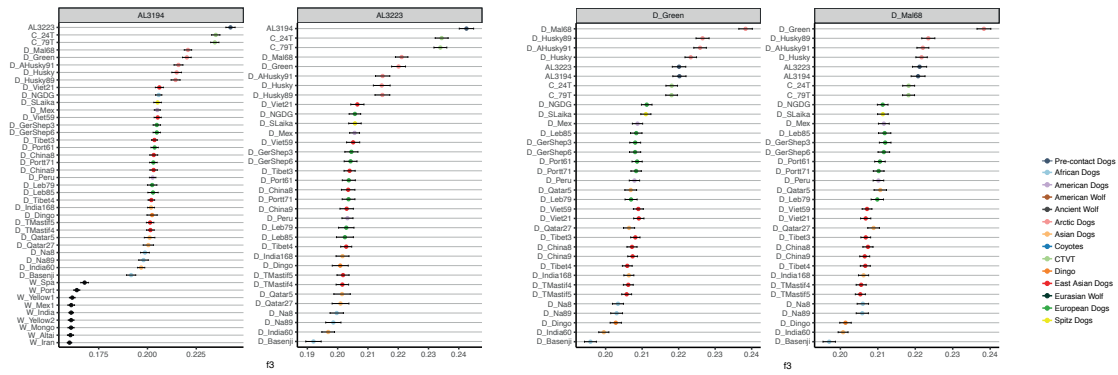

**Fig. S13**

Shared genetic drift measured by  $f_3(\text{Outgroup}; Y, X)$  where Y is either Port au Choix dog (AL3194), Wyanoke Old town dog (AL3223), Alaskan Malamute (D\_Mal68), Greenland sledge dog (D\_Green) and X represents modern dog populations. Error bars represent 1 SE.

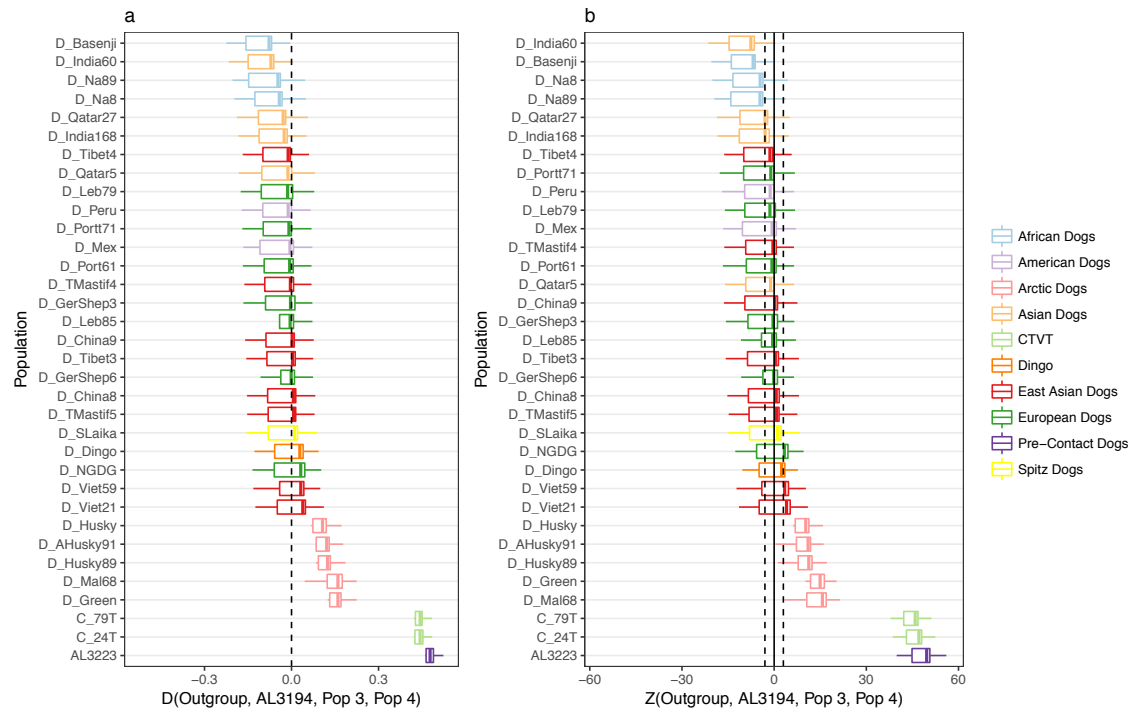

**Fig. S14**

Box plot representing **a.** D-statistics and **b.** significance of D-statistics ( $Z$ ) for every combination of  $D(\text{Outgroup}, \text{AL3194}[\text{Port au Choix}], \text{Pop3}, \text{Pop4})$ , where  $\text{Pop3}$  is fixed and  $\text{Pop4}$  represents any other genome. Positive values support a close relationship between  $\text{Pop3}$  and PCD while negative values imply PCD are closer to other dog populations. If  $\text{Pop3}$  is not admixed with PCD, we expect  $-4 < Z < 4$  (x-axis).

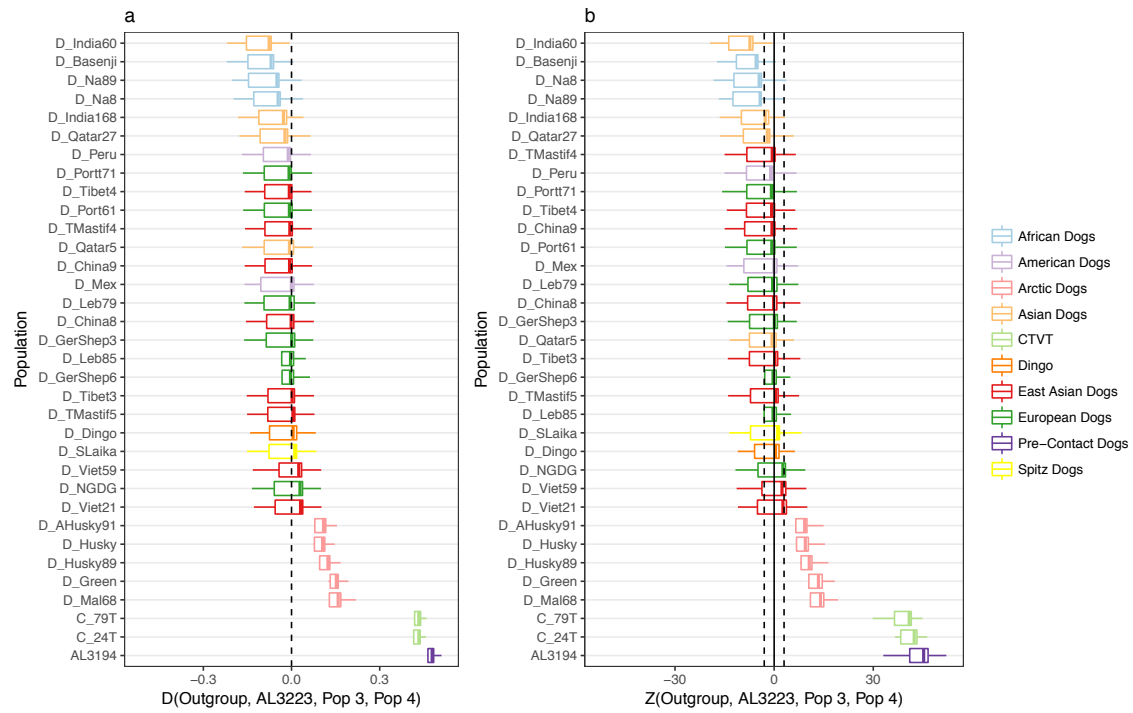

**Fig. S15**

Box plot representing **a.** D-statistics and **b.** significance of D-statistics ( $Z$ ) for every combination of D(Outgroup, AL3223[Weyanoke Old town], Pop3, Pop4), where Pop3 is fixed and Pop4 represents any other genome. Positive values support a close relationship between Pop3 and PCD while negative values imply PCD are closer to other dog populations. If Pop3 is not admixed with PCD, we expect  $-4 < Z < 4$  (x-axis).

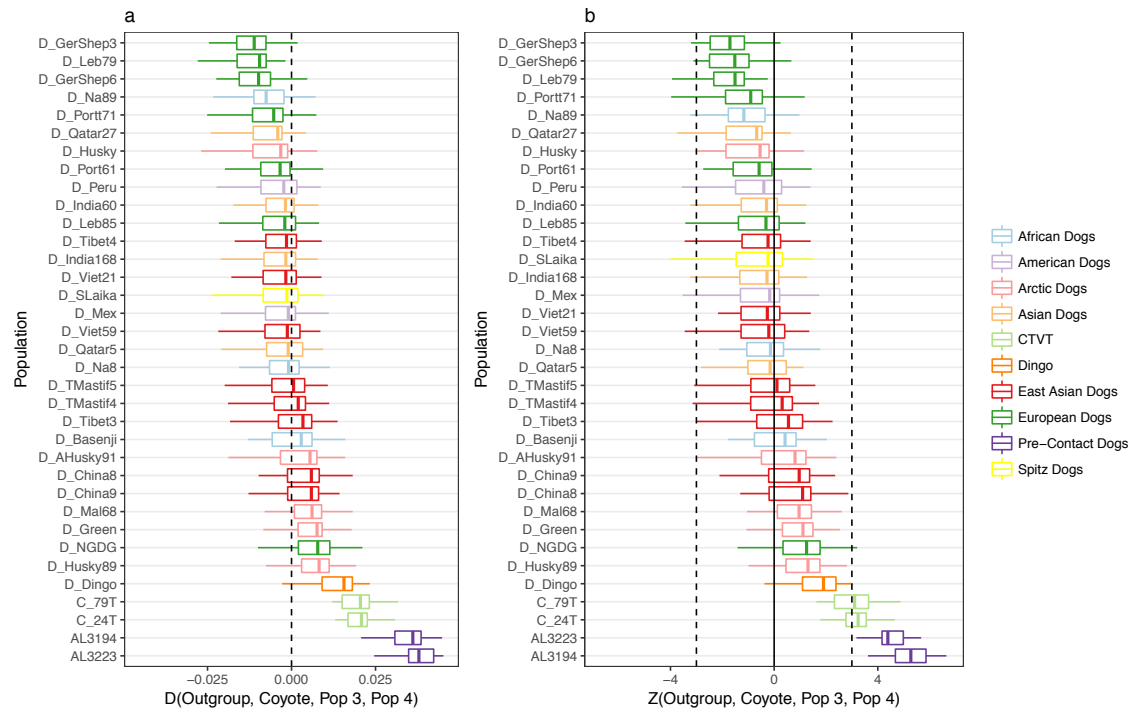

**Fig. S16**

Box plot representing **a.** D-statistics and **b.** significance of D-statistics ( $Z$ ) for every combination of D(Outgroup, Coyote, Pop3, Pop4), where Pop3 is fixed (x-axis) and Pop4 represents any other genome. Positive values support a close relationship between Pop3 and coyotes while negative values imply coyotes are closer to other dog populations. If Pop3 is not admixed with coyotes, we expect  $-4 < Z < 4$  (x-axis).

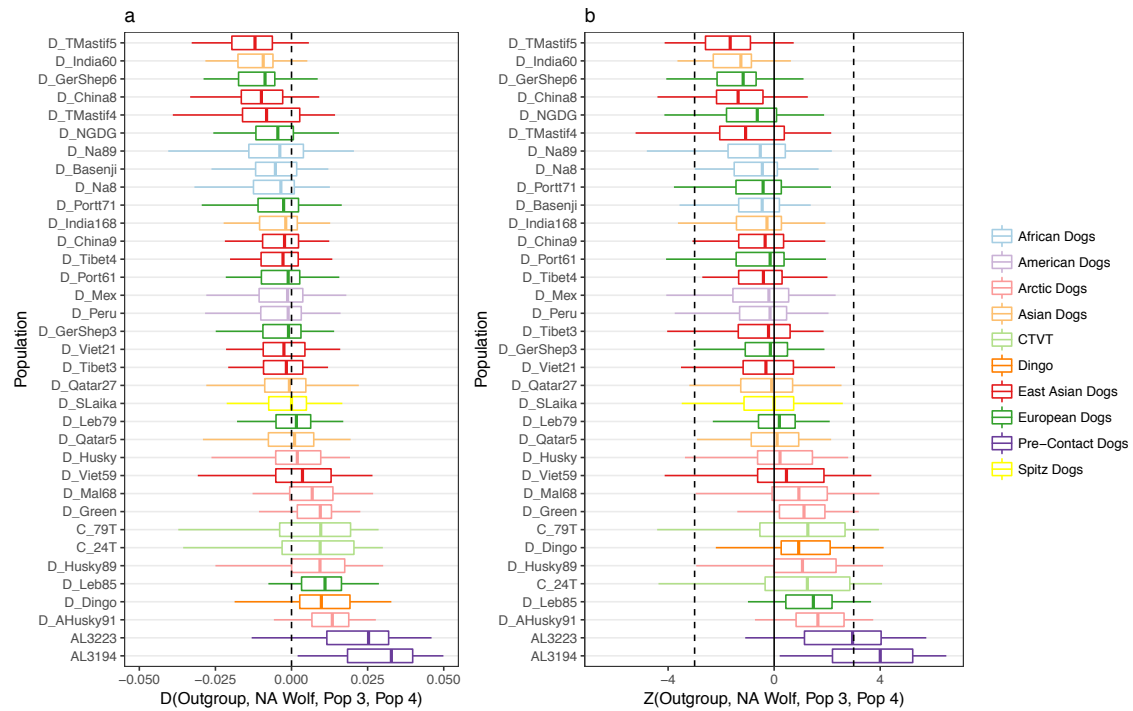

**Fig. S17**

Box plot representing **a.** D-statistics **b.** significance of D-statistics (Z) for every combination of D(Outgroup, north American wolf, Pop3, Pop4), where Pop3 is fixed and Pop4 represents any other genome. Positive values support a close relationship between Pop3 and north American wolves while negative values imply NA wolves are closer to other dog populations. If Pop3 is not admixed with north American wolves, we expect  $-4 < Z < 4$  (x-axis).

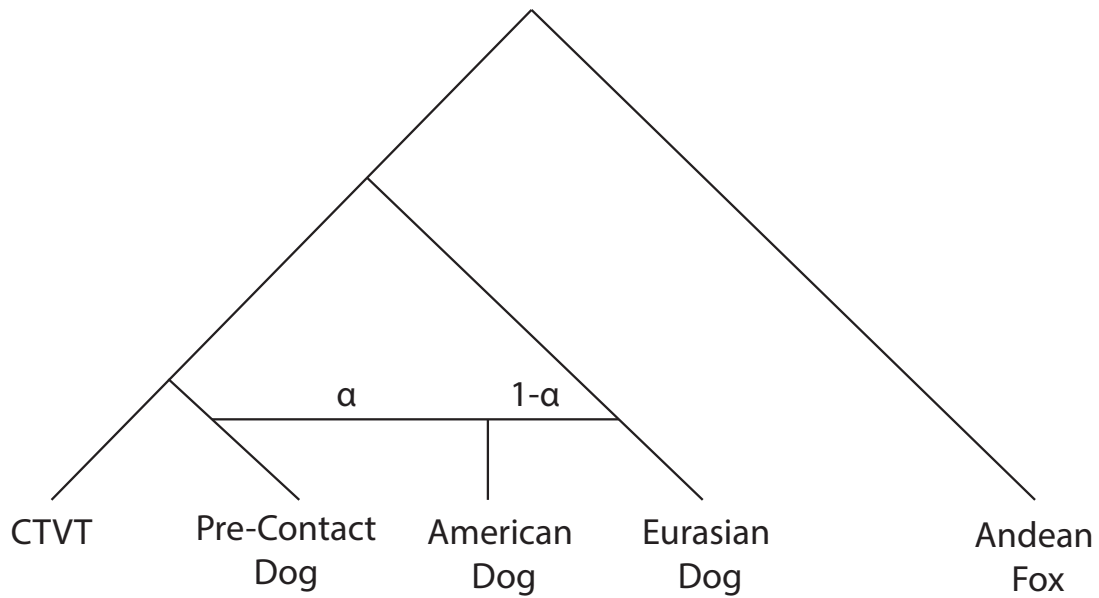

**Fig. S18**

Schematic representation of the assumed phylogeny for the  $f_4$  ratio test used to estimate pre-contact ancestry into modern North American dogs. Alpha represents the degree of ancestry from pre-contact dogs.

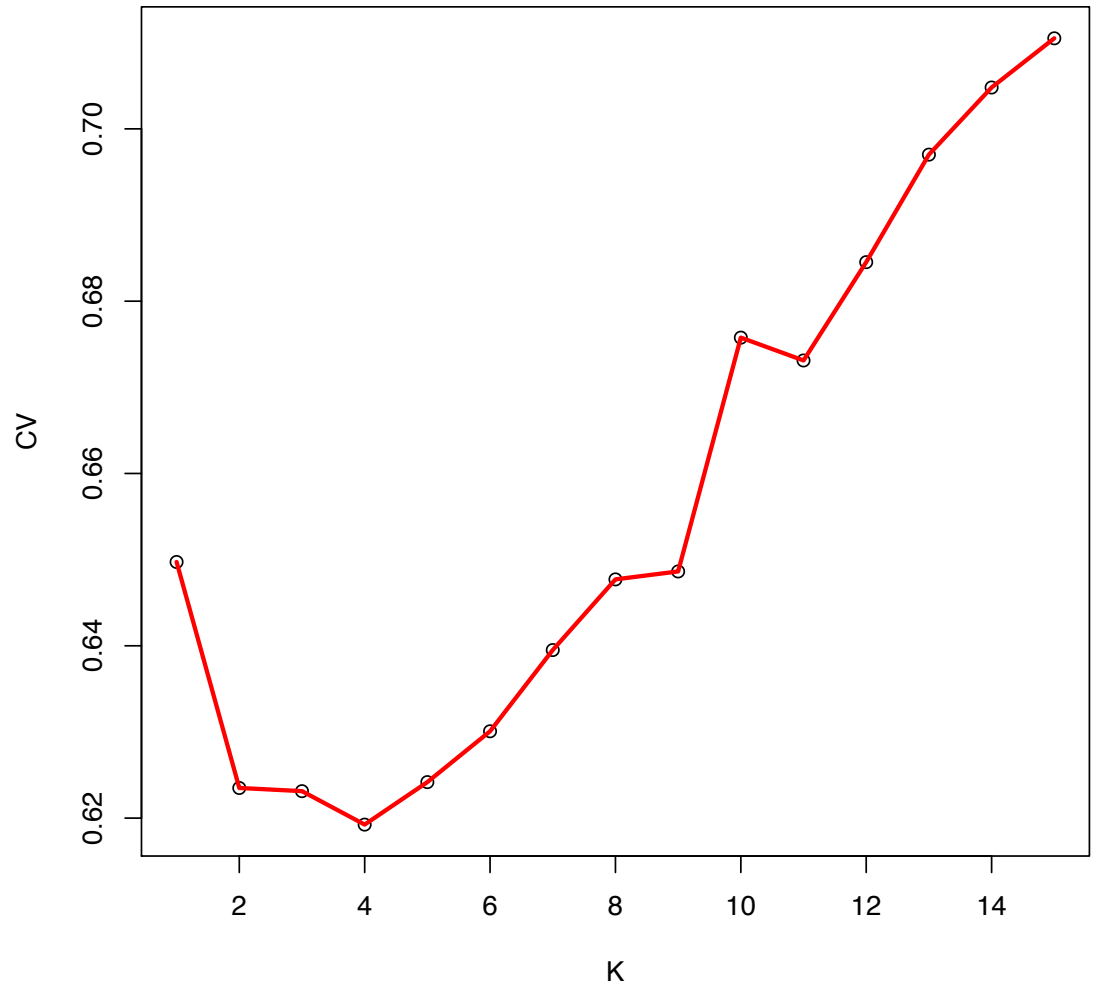

**Fig. S19**

Cross validation (CV) values for ADMIXTURE analysis of SNP array data.



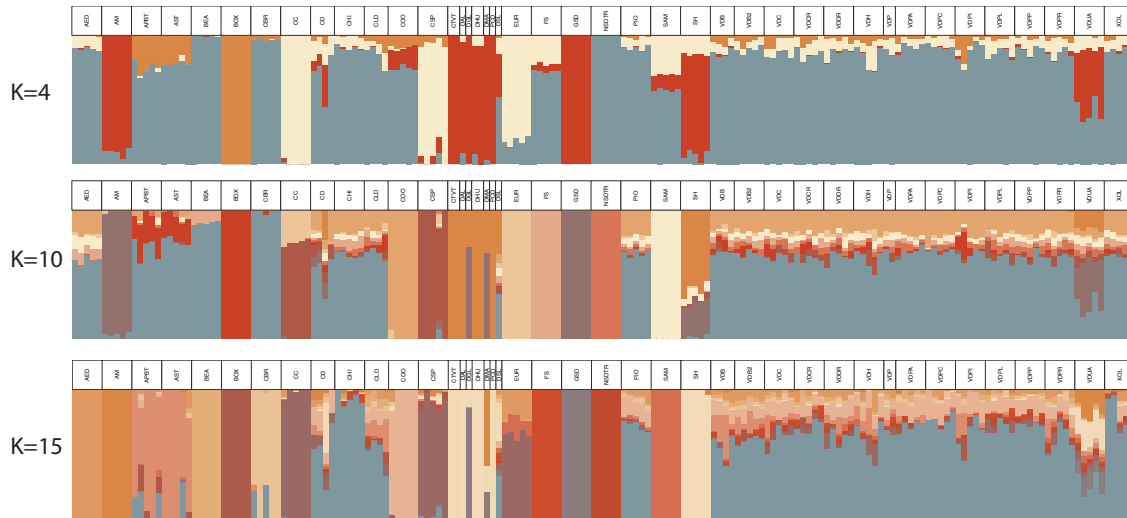

**Fig. S20**

ADMIXTURE results based on SNP array data for K=4, 10 and 15. Population code: AED=American Eskimo Dog, AM=Alaskan Malamute, APBT=American Pit Bull Terrier, AST=American Staffordshire Terrier, BEA=Beagle, BOX=Boxer, CBR=Chesapeake Bay Retriever, CC=Chow Chow, CD=Carolina Dog, CHI=Chihuahua, CLD=Catahoula Leopard Dog, COO=Chinook, CSP=Chinese Shar-pei, CTVT=CTVT, DAL=Alaskan Husky, DCH=Chinese Village Dog, DEU=European Village Dog, DGL=Greenland Sledge Dog, DHU=Husky, DLB=Lebanese Village Dog, DMA=Malamute, DME=Mexican Hairless Dog, DPU=Peruvian Hairless Dog, DSL=Siberian Laika, EUR=Eurasier, FS=Finnish Spitz, GSD=Greenland Sledge Dog, NEW=Newfoundland, NSDTR=Nova Scotia Duck Tolling Retriever, PCD=Pre-Colombian Dogs, PIO=Peruvian Inca Orchid, SAM=Samoyed, SH=Siberian Husky, VDB=Village Dog Belize, VDB2=Village Dog Brazil, VDC=Village Dog Colombia, VDCR=Village Dog Costa Rica, VDDR=Village Dog Dominican Republic, VDH=Village Dog Honduras, VDP=Village Dog Panama, VDPA=Village Dog Peru-Arequipa, VDPC=Village Dog Peru-Cusco, VDPI=Village Dog Peru-Ica, VDPL=Village Dog Peru-Loreto, VDPP=Village Dog Peru-Puno, VDPR=Village Dog Puerto Rico, VDU=Village Dog US-Alaska, XOL=Xoloitzcuintli (see Table S9 for more information).

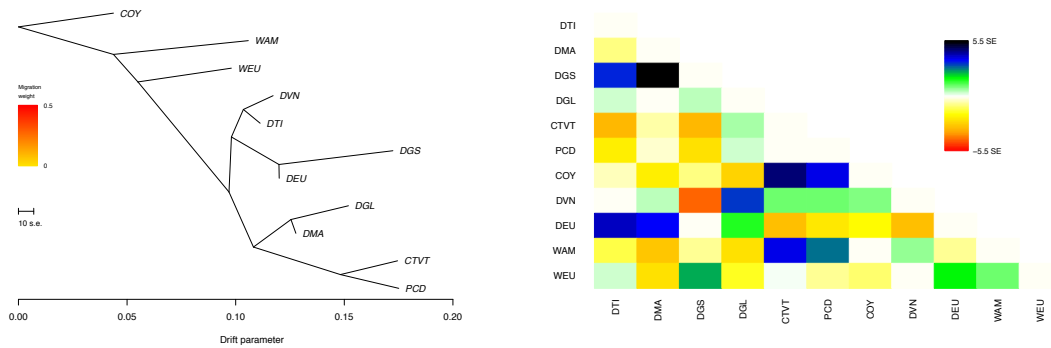

**Fig. S21**

Admixture graph without migration edge and matrix of residuals, expressed as the number of standard errors, inferred using *TreeMix* (based on transversions). Western Eurasian dogs - Portuguese village dogs (DEU), German Shepherd (DGS), East Asian dogs - Vietnamese village dogs (DVN) and Tibetan village dogs (DTI), Pre-contact dogs (PCD), including both Port au Choix (AL3194) and Weyanoke Old Town (AL3223), Arctic dogs - Malamute (DMA) and Greenland dogs (DGL), CTVT - (79T and 24T), Eurasian wolves (WEU) from Spain and Portugal, North American wolves (WAM) from Yellowstone, Coyotes (COY) as an outgroup.

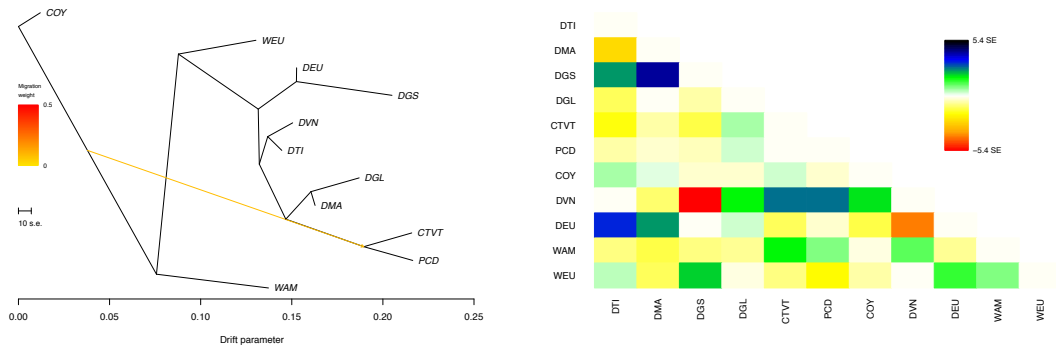

**Fig. S22**

Admixture graph with a single migration edge and matrix of residuals, expressed as the number of standard errors, inferred using TreeMix (based on transversions). We see evidence for admixture from coyotes (COY) into the pre-contact dog lineage (PCD/CTVT), consistent with Figure S16. Western Eurasian dogs - Portuguese village dogs (DEU), German Shepherd (DGS), East Asian dogs - Vietnamese village dogs (DVN) and Tibetan village dogs (DTI), Pre-contact dogs (PCD), including both Port au Choix (AL3194) and Weyanoke Old Town (AL3223), Arctic dogs - Malamute (DMA) and Greenland dogs (DGL), CTVT - (79T and 24T), Eurasian wolves (WEU) from Spain and Portugal, North American wolves (WAM) from Yellowstone, Coyotes (COY) as an outgroup.

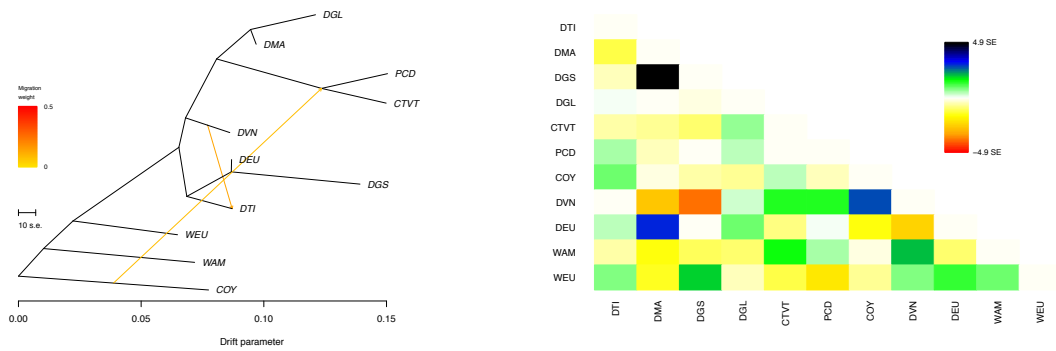

**Fig. S23**

Admixture graph with two migration edges and matrix of residuals, expressed as the number of standard errors, inferred using TreeMix (based on transversions). Western Eurasian dogs - Portuguese village dogs (DEU), German Shepherd (DGS), East Asian dogs - Vietnamese village dogs (DVN) and Tibetan village dogs (DTI), Pre-contact dogs (PCD), including both Port au Choix (AL3194) and Weyanoke Old Town (AL3223), Arctic dogs - Malamute (DMA) and Greenland dogs (DGL), CTVT - (79T and 24T), Eurasian wolves (WEU) from Spain and Portugal, North American wolves (WAM) from Yellowstone, Coyotes (COY) as an outgroup.

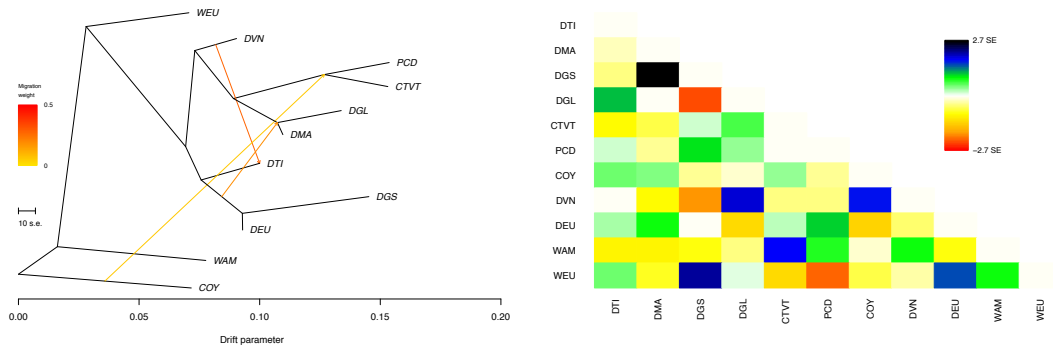

**Fig. S24**

Admixture graph with three migration edges and matrix of residuals, expressed as the number of standard errors, inferred using TreeMix (based on transversions). Western Eurasian dogs - Portuguese village dogs (DEU), German Shepherd (DGS), East Asian dogs - Vietnamese village dogs (DVN) and Tibetan village dogs (DTI), Pre-contact dogs (PCD), including both Port au Choix (AL3194) and Weyanoke Old Town (AL3223), Arctic dogs - Malamute (DMA) and Greenland dogs (DGL), CTVT - (79T and 24T), Eurasian wolves (WEU) from Spain and Portugal, North American wolves (WAM) from Yellowstone, Coyotes (COY) as an outgroup.

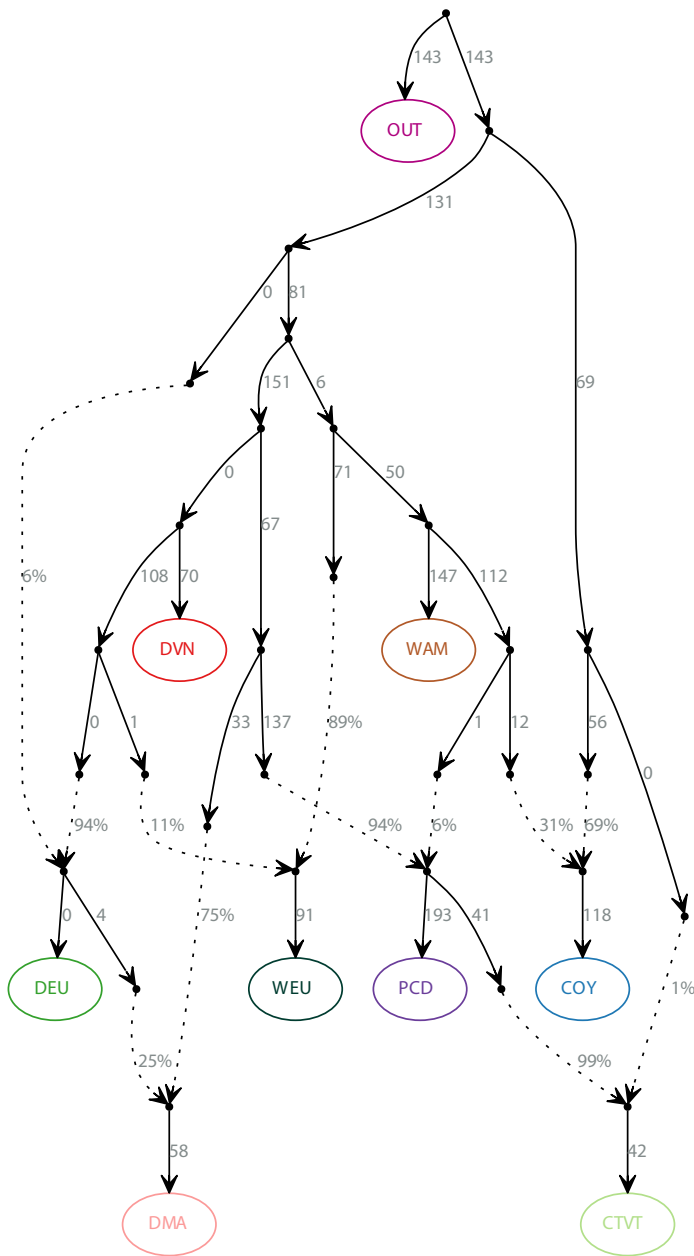

**Fig. S25**

Qpgraph model with admixture fractions. *Western Eurasian dogs* - Portuguese village dogs (DEU), *East Asian dogs* - Vietnamese village dogs (DVN), *Pre-contact dogs* (PCD), including both Port au Choix (AL3194) and Weyanoke Old Town (AL3223), *Arctic dogs* - Malamute (DMA), *CTVT* - (79T and 24T), *Eurasian wolves* (WEU) from Spain and Portugal, *North American wolves* (WAM) from Yellowstone, *Coyotes* (COY) as an outgroup.

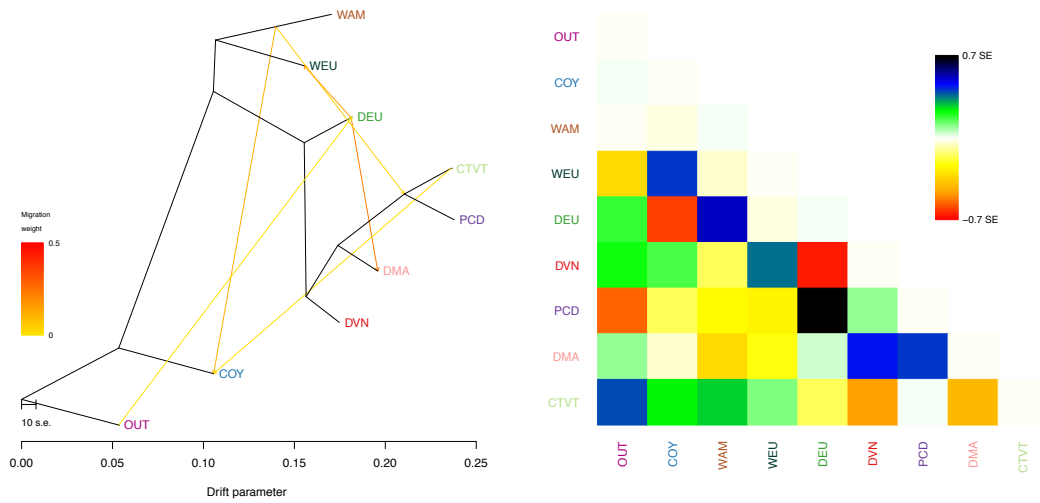

**Fig. S26**

Admixture graph and matrix of residuals, expressed as the number of standard errors, inferred using TreeMix for the same population as in Figure S25. *Western Eurasian dogs* - Portuguese village dogs (DEU), *East Asian dogs* - Vietnamese village dogs (DVN), *Pre-contact dogs* (PCD), including both Port au Choix (AL3194) and Weyanoke Old Town (AL3223), *Arctic dogs* - Malamute (DMA), *CTVT* - (79T and 24T), *Eurasian wolves* (WEU) from Spain and Portugal, *North American wolves* (WAM) from Yellowstone, *Coyotes* (COY) as an outgroup.





**Table S1.**

Information about samples ancient samples sequenced in this study including provenance, age (radiocarbon or stratigraphic information), and sequencing statistics (endogeneous content etc.). N\_SNP\_call corresponds to the number of sites from our ~6M sites that were call in each sample. Analysed Nuclear and mtDNA Analysed columns corresponds to sample that were (1) and were not (0) analysed for nuclear and mtDNA analyses respectively. mtDNA capture column indicates whether mtDNA was enriched using target capture (0, no; 1, yes).

**Table S2.**

Table containing information (coverage, accession etc.) of modern whole genomes used in this study.

**Table S3.**

Table containing information (coverage, accession etc.) of modern whole genomes used in this study.

| <b>Pop 2</b> | <b>Pop 3</b> | <b>Pop 4</b> | <b>D</b> | <b>Z</b> | <b>BABA</b> | <b>ABBA</b> | <b>n</b> |
|--------------|--------------|--------------|----------|----------|-------------|-------------|----------|
| C_Cal        | AL3194       | AL3223       | 0.0152   | 1.460    | 5,681       | 5,511       | 285,638  |
| C_Cal        | AL3223       | AL3194       | -0.0152  | -1.460   | 5,511       | 5,681       | 285,638  |
| C_MidW       | AL3194       | AL3223       | 0.0035   | 0.277    | 3,443       | 3,419       | 181,671  |
| C_MidW       | AL3223       | AL3194       | -0.0035  | -0.277   | 3,419       | 3,443       | 181,671  |
| W_Mex1       | AL3194       | AL3223       | -0.0130  | -1.086   | 7,394       | 7,588       | 282,977  |
| W_Mex1       | AL3223       | AL3194       | 0.0130   | 1.086    | 7,588       | 7,394       | 282,977  |
| W_Yellow1    | AL3194       | AL3223       | -0.0083  | -0.785   | 7,501       | 7,626       | 281,684  |
| W_Yellow1    | AL3223       | AL3194       | 0.0083   | 0.785    | 7,626       | 7,501       | 281,684  |
| W_Yellow2    | AL3194       | AL3223       | -0.0067  | -0.622   | 7,513       | 7,615       | 282,189  |
| W_Yellow2    | AL3223       | AL3194       | 0.0067   | 0.622    | 7,615       | 7,513       | 282,189  |
| TAI          | AL3194       | AL3223       | -0.0001  | -0.005   | 3,026       | 3,026       | 116,212  |
| TAI          | AL3223       | AL3194       | 0.0001   | 0.005    | 3,026       | 3,026       | 116,212  |

**Table S4.**

D-statistics for D(Outgroup, Asian or European dogs, PCD or CTVT, Arctic dogs). The Andean Fox was used as an outgroup for these analyses. *n* corresponds to the number of SNPs where all populations have data. Standard error for these statistics was obtained by performing a weighted block jackknife over 1Mb blocks. Statistics with  $Z > 3$  and  $Z < -3$  are shown in bold.

| <b>Pop 2</b> | <b>Pop 3</b> | <b>Pop 4</b> | <b>D</b> | <b>Z</b> | <b>BABA</b> | <b>ABBA</b> | <b>n</b>  |
|--------------|--------------|--------------|----------|----------|-------------|-------------|-----------|
| D_China8     | AL3194       | D_AHusky91   | 0.0752   | 7.65     | 47,384      | 40,759      | 879,166   |
| D_China8     | AL3194       | D_Green      | 0.0606   | 6.01     | 47,406      | 41,994      | 920,449   |
| D_China8     | AL3194       | D_Husky      | 0.0693   | 7.253    | 51,412      | 44,755      | 936,527   |
| D_China8     | AL3194       | D_Husky89    | 0.0825   | 8.407    | 41,900      | 35,513      | 768,218   |
| D_China8     | AL3194       | D_Mal68      | 0.0655   | 6.538    | 46,698      | 40,958      | 907,759   |
| D_China8     | C_24T        | D_AHusky91   | 0.0907   | 9.461    | 61,440      | 51,230      | 1,115,093 |
| D_China8     | C_24T        | D_Green      | 0.0753   | 7.523    | 61,012      | 52,472      | 1,167,919 |
| D_China8     | C_24T        | D_Husky      | 0.0819   | 8.781    | 66,255      | 56,230      | 1,189,650 |
| D_China8     | C_24T        | D_Husky89    | 0.0987   | 9.798    | 54,693      | 44,866      | 985,295   |
| D_China8     | C_24T        | D_Mal68      | 0.0796   | 8.128    | 60,682      | 51,739      | 1,151,059 |
| D_China9     | AL3194       | D_AHusky91   | 0.064    | 6.644    | 45,860      | 40,348      | 849971    |
| D_China9     | AL3194       | D_Green      | 0.0812   | 8.035    | 47,827      | 40,641      | 893422    |
| D_China9     | AL3194       | D_Husky      | 0.0684   | 7.323    | 50,481      | 44,022      | 905549    |
| D_China9     | AL3194       | D_Husky89    | 0.087    | 8.783    | 41,939      | 35,228      | 760651    |
| D_China9     | AL3194       | D_Mal68      | 0.065    | 6.504    | 45,784      | 40,195      | 877630    |
| D_China9     | C_24T        | D_AHusky91   | 0.0776   | 7.936    | 59,705      | 51,110      | 1,078553  |
| D_China9     | C_24T        | D_Green      | 0.0926   | 9.696    | 61,461      | 51,046      | 1,133912  |

|           |        |            |        |        |        |        |           |
|-----------|--------|------------|--------|--------|--------|--------|-----------|
| D_China9  | C_24T  | D_Husky    | 0.0799 | 8.709  | 65,471 | 55,786 | 1,150,989 |
| D_China9  | C_24T  | D_Husky89  | 0.1001 | 9.815  | 54,894 | 44,904 | 974,829   |
| D_China9  | C_24T  | D_Mal68    | 0.0743 | 7.814  | 59,571 | 51,330 | 1,113,510 |
| D_Port61  | AL3194 | D_AHusky91 | 0.0981 | 9.344  | 49,646 | 40,780 | 897,394   |
| D_Port61  | AL3194 | D_Green    | 0.0733 | 7.059  | 49,098 | 42,391 | 939,704   |
| D_Port61  | AL3194 | D_Husky    | 0.0994 | 10.286 | 54,206 | 44,402 | 956,025   |
| D_Port61  | AL3194 | D_Husky89  | 0.1006 | 9.791  | 43,556 | 35,593 | 784,550   |
| D_Port61  | AL3194 | D_Mal68    | 0.1044 | 9.88   | 49,860 | 40,438 | 926,900   |
| D_Port61  | C_24T  | D_AHusky91 | 0.1115 | 10.706 | 64,216 | 51,337 | 1,137,495 |
| D_Port61  | C_24T  | D_Green    | 0.088  | 8.191  | 63,226 | 53,005 | 1,191,621 |
| D_Port61  | C_24T  | D_Husky    | 0.1125 | 11.651 | 70,044 | 55,878 | 1,213,643 |
| D_Port61  | C_24T  | D_Husky89  | 0.1181 | 11.113 | 57,125 | 45,064 | 1,005,524 |
| D_Port61  | C_24T  | D_Mal68    | 0.1167 | 11.029 | 64,747 | 51,223 | 1,174,636 |
| D_Portt71 | AL3194 | D_AHusky91 | 0.0949 | 9.146  | 48,273 | 39,904 | 877,094   |
| D_Portt71 | AL3194 | D_Green    | 0.0814 | 8.348  | 48,157 | 40,909 | 918,351   |
| D_Portt71 | AL3194 | D_Husky    | 0.0967 | 10.277 | 52,649 | 43,367 | 934,632   |
| D_Portt71 | AL3194 | D_Husky89  | 0.1035 | 10.427 | 42,550 | 34,572 | 765,611   |
| D_Portt71 | AL3194 | D_Mal68    | 0.1047 | 10.09  | 48,497 | 39,308 | 906,275   |
| D_Portt71 | C_24T  | D_AHusky91 | 0.1122 | 10.895 | 62,687 | 50,038 | 1,112,724 |
| D_Portt71 | C_24T  | D_Green    | 0.0994 | 9.888  | 62,205 | 50,964 | 1,165,580 |
| D_Portt71 | C_24T  | D_Husky    | 0.1139 | 12.371 | 68,354 | 54,374 | 1,187,444 |
| D_Portt71 | C_24T  | D_Husky89  | 0.124  | 11.829 | 55,911 | 43,573 | 982,083   |
| D_Portt71 | C_24T  | D_Mal68    | 0.1214 | 11.729 | 63,196 | 49,518 | 1,149,527 |

**Table S5.**

D-statistics for D(Outgroup, Taimyr, PCD/Arctic dogs, European, Asian, or Arctic dogs). The Andean Fox was used as an outgroup for these analyses. *n* corresponds to the number of SNPs where all populations have data. Standard error for these statistics was obtained by performing a weighted block jackknife over 1Mb blocks. Statistics with  $Z > 3$  and  $Z < -3$  are shown in bold.

| Pop 2 | Pop 3     | Pop 4      | D              | Z             | BABA   | ABBA   | n       |
|-------|-----------|------------|----------------|---------------|--------|--------|---------|
| TAI   | AL3194    | D_India168 | <b>-0.0274</b> | <b>-3.377</b> | 13,074 | 13,812 | 297,919 |
| TAI   | AL3194    | D_Peru     | <b>-0.0267</b> | <b>-3.293</b> | 17,139 | 18,079 | 384,525 |
| TAI   | AL3194    | D_India60  | <b>-0.0247</b> | <b>-3.254</b> | 17,383 | 18,264 | 372,784 |
| TAI   | AL3194    | D_Na8      | <b>-0.0256</b> | <b>-3.199</b> | 16,614 | 17,489 | 366,726 |
| TAI   | D_Mal68   | D_Na8      | <b>-0.0206</b> | <b>-3.127</b> | 19,530 | 20,350 | 459,311 |
| TAI   | AL3194    | D_Port61   | <b>-0.0236</b> | <b>-3.006</b> | 17,398 | 18,239 | 387,777 |
| TAI   | D_Mal68   | D_Peru     | -0.0195        | -2.856        | 20,182 | 20,983 | 482,639 |
| TAI   | D_Mal68   | D_India60  | -0.0189        | -2.789        | 20,930 | 21,735 | 465,930 |
| TAI   | D_Mal68   | D_Port61   | -0.0204        | -2.768        | 20,358 | 21,206 | 485,553 |
| TAI   | AL3194    | D_Viet59   | -0.0227        | -2.753        | 13,212 | 13,824 | 308,811 |
| TAI   | D_Green   | D_Na8      | -0.0202        | -2.674        | 20,383 | 21,224 | 465,676 |
| TAI   | D_Husky89 | D_India168 | -0.0205        | -2.664        | 13,042 | 13,588 | 314,547 |
| TAI   | D_Green   | D_India60  | -0.0198        | -2.607        | 21,505 | 22,372 | 472,462 |
| TAI   | D_Husky89 | D_Port61   | -0.0215        | -2.571        | 17,284 | 18,043 | 413,104 |
| TAI   | D_Husky89 | D_Peru     | -0.0201        | -2.525        | 17,191 | 17,896 | 410,031 |
| TAI   | D_Green   | D_Port61   | -0.0197        | -2.506        | 21,204 | 22,058 | 492,659 |
| TAI   | AL3194    | D_Husky    | -0.0199        | -2.498        | 16,444 | 17,111 | 394,720 |
| TAI   | AL3194    | D_SLaika   | -0.0194        | -2.485        | 16,821 | 17,487 | 379,149 |

|     |           |            |         |        |        |        |         |
|-----|-----------|------------|---------|--------|--------|--------|---------|
| TAI | D_Green   | D_India168 | -0.0178 | -2.481 | 15,728 | 16,296 | 377,110 |
| TAI | D_Mal68   | D_Na89     | -0.0195 | -2.481 | 12,195 | 12,680 | 289,545 |
| TAI | D_Green   | D_Peru     | -0.0194 | -2.455 | 20,782 | 21,605 | 488,730 |
| TAI | D_Husky89 | D_India60  | -0.0186 | -2.44  | 17,456 | 18,117 | 394,520 |
| TAI | AL3194    | D_Mex      | -0.0193 | -2.426 | 17,007 | 17,675 | 380,509 |
| TAI | AL3194    | D_Viet21   | -0.0204 | -2.419 | 13,088 | 13,634 | 303,723 |
| TAI | AL3194    | D_Tibet3   | -0.0184 | -2.41  | 16,776 | 17,403 | 375,015 |
| TAI | AL3194    | D_Portt71  | -0.0185 | -2.366 | 16,997 | 17,637 | 379,175 |

**Table S6.**

D-statistics for D(Outgroup, Taimyr, PCD or Arctic dogs, CTVT/Arctic dogs or PCD). The Andean Fox was used as an outgroup for these analyses. *n* corresponds to the number of SNPs where all populations have data. Standard error for these statistics was obtained by performing a weighted block jackknife over 1Mb blocks. Statistics indicate that there has been no extra admixture from the Taimyr wolf into other populations.

| <b>Pop 2</b> | <b>Pop 3</b> | <b>Pop 4</b> | <b>D</b> | <b>Z</b> | <b>BABA</b> | <b>ABBA</b> | <b>n</b> |
|--------------|--------------|--------------|----------|----------|-------------|-------------|----------|
| TAI          | AL3194       | C_24T        | -0.0239  | -2.258   | 10,176      | 10,674      | 380,938  |
| TAI          | AL3194       | C_79T        | -0.0267  | -2.364   | 8,948       | 9,438       | 346,188  |
| TAI          | AL3194       | D_AHusky91   | -0.0126  | -1.58    | 15,165      | 15,554      | 370,227  |
| TAI          | AL3194       | D_Green      | -0.0059  | -0.681   | 15,468      | 15,650      | 387,439  |
| TAI          | AL3194       | D_Husky      | -0.0199  | -2.498   | 16,444      | 17,111      | 394,720  |
| TAI          | AL3194       | D_Husky89    | -0.0076  | -0.915   | 13,258      | 13,462      | 321,758  |
| TAI          | AL3194       | D_Mal68      | -0.0025  | -0.312   | 15,225      | 15,301      | 382,193  |
| TAI          | C_24T        | AL3194       | 0.0239   | 2.258    | 10,674      | 10,176      | 380,938  |
| TAI          | C_24T        | C_79T        | -0.0014  | -0.654   | 5,721       | 5,737       | 441,374  |
| TAI          | C_24T        | D_AHusky91   | 0.0045   | 0.587    | 19,419      | 19,247      | 461,923  |
| TAI          | C_24T        | D_Green      | 0.009    | 1.179    | 19,495      | 19,147      | 483,404  |
| TAI          | C_24T        | D_Husky      | -0.0028  | -0.381   | 20,900      | 21,018      | 493,025  |
| TAI          | C_24T        | D_Husky89    | 0.0071   | 0.929    | 17,107      | 16,865      | 405,779  |
| TAI          | C_24T        | D_Mal68      | 0.0102   | 1.321    | 19,467      | 19,075      | 476,690  |
| TAI          | C_79T        | AL3194       | 0.0267   | 2.364    | 9,438       | 8,948       | 346,188  |
| TAI          | C_79T        | C_24T        | 0.0014   | 0.654    | 5,737       | 5,721       | 441,374  |
| TAI          | C_79T        | D_AHusky91   | 0.0041   | 0.539    | 17,112      | 16,972      | 416,326  |

|     |            |            |         |        |        |        |         |
|-----|------------|------------|---------|--------|--------|--------|---------|
| TAI | C_79T      | D_Green    | 0.0062  | 0.786  | 17,041 | 16,832 | 435,794 |
| TAI | C_79T      | D_Husky    | -0.0021 | -0.279 | 18,489 | 18,566 | 446,651 |
| TAI | C_79T      | D_Husky89  | 0.0081  | 1.039  | 14,690 | 14,454 | 358,654 |
| TAI | C_79T      | D_Mal68    | 0.0113  | 1.419  | 17,079 | 16,698 | 429,798 |
| TAI | D_AHusky91 | AL3194     | 0.0126  | 1.58   | 15,554 | 15,165 | 370,227 |
| TAI | D_AHusky91 | C_24T      | -0.0045 | -0.587 | 19,247 | 19,419 | 461,923 |
| TAI | D_AHusky91 | C_79T      | -0.0041 | -0.539 | 16,972 | 17,112 | 416,326 |
| TAI | D_AHusky91 | D_Green    | 0.0083  | 1.034  | 17,900 | 17,607 | 470,340 |
| TAI | D_AHusky91 | D_Husky    | -0.0081 | -1.105 | 15,523 | 15,775 | 478,592 |
| TAI | D_AHusky91 | D_Husky89  | 0.0009  | 0.115  | 12,481 | 12,458 | 394,759 |
| TAI | D_AHusky91 | D_Mal68    | 0.0072  | 1.009  | 18,163 | 17,904 | 463,584 |
| TAI | D_Green    | AL3194     | 0.0059  | 0.681  | 15,650 | 15,468 | 387,439 |
| TAI | D_Green    | C_24T      | -0.009  | -1.179 | 19,147 | 19,495 | 483,404 |
| TAI | D_Green    | C_79T      | -0.0062 | -0.786 | 16,832 | 17,041 | 435,794 |
| TAI | D_Green    | D_AHusky91 | -0.0083 | -1.034 | 17,607 | 17,900 | 470,340 |
| TAI | D_Green    | D_Husky    | -0.0137 | -1.839 | 19,216 | 19,750 | 501,352 |
| TAI | D_Green    | D_Husky89  | -0.0025 | -0.296 | 15,501 | 15,578 | 416,390 |
| TAI | D_Green    | D_Mal68    | -0.0002 | -0.029 | 16,258 | 16,266 | 485,928 |
| TAI | D_Husky    | AL3194     | 0.0199  | 2.498  | 17,111 | 16,444 | 394,720 |
| TAI | D_Husky    | C_24T      | 0.0028  | 0.381  | 21,018 | 20,900 | 493,025 |
| TAI | D_Husky    | C_79T      | 0.0021  | 0.279  | 18,566 | 18,489 | 446,651 |
| TAI | D_Husky    | D_AHusky91 | 0.0081  | 1.105  | 15,775 | 15,523 | 478,592 |
| TAI | D_Husky    | D_Green    | 0.0137  | 1.839  | 19,750 | 19,216 | 501,352 |



|     |           |            |         |        |        |        |         |
|-----|-----------|------------|---------|--------|--------|--------|---------|
| TAI | D_Husky   | D_Husky89  | 0.0123  | 1.655  | 14,207 | 13,860 | 419,790 |
| TAI | D_Husky   | D_Mal68    | 0.013   | 1.913  | 19,767 | 19,258 | 494,030 |
| TAI | D_Husky89 | AL3194     | 0.0076  | 0.915  | 13,462 | 13,258 | 321,758 |
| TAI | D_Husky89 | C_24T      | -0.0071 | -0.929 | 16,865 | 17,107 | 405,779 |
| TAI | D_Husky89 | C_79T      | -0.0081 | -1.039 | 14,454 | 14,690 | 358,654 |
| TAI | D_Husky89 | D_AHusky91 | -0.0009 | -0.115 | 12,458 | 12,481 | 394,759 |
| TAI | D_Husky89 | D_Green    | 0.0025  | 0.296  | 15,578 | 15,501 | 416,390 |
| TAI | D_Husky89 | D_Husky    | -0.0123 | -1.655 | 13,860 | 14,207 | 419,790 |
| TAI | D_Husky89 | D_Mal68    | 0.0043  | 0.587  | 15,803 | 15,667 | 408,271 |
| TAI | D_Mal68   | AL3194     | 0.0025  | 0.312  | 15,301 | 15,225 | 382,193 |
| TAI | D_Mal68   | C_24T      | -0.0102 | -1.321 | 19,075 | 19,467 | 476,690 |
| TAI | D_Mal68   | C_79T      | -0.0113 | -1.419 | 16,698 | 17,079 | 429,798 |
| TAI | D_Mal68   | D_AHusky91 | -0.0072 | -1.009 | 17,904 | 18,163 | 463,584 |
| TAI | D_Mal68   | D_Green    | 0.0002  | 0.029  | 16,266 | 16,258 | 485,928 |
| TAI | D_Mal68   | D_Husky    | -0.013  | -1.913 | 19,258 | 19,767 | 494,030 |
| TAI | D_Mal68   | D_Husky89  | -0.0043 | -0.587 | 15,667 | 15,803 | 408,271 |

**Table S7.**

D-statistics for D(Outgroup, Portuguese Village Dogs, Vietnamese Village Dogs, Asian Dogs). The Andean Fox was used as an outgroup for these analyses. *n* corresponds to the number of SNPs where all populations have data. Standard error for these statistics was obtained by performing a weighted block jackknife over 1Mb blocks.

| <b>Pop 2</b> | <b>Pop 3</b> | <b>Pop 4</b> | <b>D</b> | <b>Z</b> | <b>BABA</b> | <b>ABBA</b> | <b>n</b> |
|--------------|--------------|--------------|----------|----------|-------------|-------------|----------|
| D_Port61     | D_Viet21     | D_China8     | 0.1029   | 11.106   | 52,952      | 43,074      | 934,713  |
| D_Port61     | D_Viet21     | D_China9     | 0.0557   | 6.079    | 48,963      | 43,796      | 924,557  |
| D_Port61     | D_Viet59     | D_China8     | 0.0965   | 10.469   | 52,395      | 43,172      | 941,437  |
| D_Port61     | D_Viet59     | D_China9     | 0.0481   | 5.589    | 47,976      | 43,576      | 920,022  |
| D_Port61     | D_Viet21     | D_Tibet3     | 0.0663   | 6.823    | 49,504      | 43,352      | 922,535  |
| D_Port61     | D_Viet21     | D_Tibet4     | 0.0599   | 6.610    | 49,756      | 44,134      | 914,979  |
| D_Port61     | D_Viet59     | D_Tibet3     | 0.0575   | 6.277    | 49,026      | 43,693      | 929,474  |
| D_Port61     | D_Viet59     | D_Tibet4     | 0.0513   | 5.871    | 49,127      | 44,333      | 921,845  |
| D_Port61     | D_Viet21     | D_Mastif4    | 0.0714   | 7.278    | 49,690      | 43,069      | 894,260  |
| D_Port61     | D_Viet21     | D_Mastif5    | 0.0643   | 7.229    | 49,757      | 43,747      | 913,367  |
| D_Port61     | D_Viet59     | D_Mastif4    | 0.0639   | 6.791    | 48,007      | 42,240      | 898,585  |
| D_Port61     | D_Viet59     | D_Mastif5    | 0.0587   | 6.929    | 48,421      | 43,054      | 917,851  |

**Table S8.**

D-statistics for D(Outgroup, North American canids (wolf or coyote) and Taimyr wolf, PCD (AL2135 or AL3194), PCD (AL2135 or AL3194)). The Andean Fox was used as an outgroup for these analyses. *n* corresponds to the number of SNPs where all populations have data. Standard error for these statistics was obtained by performing a weighted block jackknife over 1Mb blocks. Results suggest that the most likely source of admixture into the Koster dog (AL2135) is a Mid Western coyote.

| <b>Pop 2</b>  | <b>Pop 3</b>  | <b>Pop 4</b>  | <b>D</b>       | <b>Z</b>      | <b>BABA</b> | <b>ABBA</b> | <b>n</b>     |
|---------------|---------------|---------------|----------------|---------------|-------------|-------------|--------------|
| W_Mex1        | AL2135        | AL3194        | 0.0690         | 1.024         | 112         | 98          | 2,762        |
| W_Mex1        | AL3194        | AL2135        | -0.0690        | -1.024        | 98          | 112         | 2,762        |
| W_Yellow1     | AL2135        | AL3194        | 0.0808         | 1.304         | 124         | 106         | 2,758        |
| W_Yellow1     | AL3194        | AL2135        | 0.0808         | -1.304        | 106         | 124         | 2,758        |
| W_Yellow2     | AL2135        | AL3194        | 0.0792         | 1.248         | 120         | 102         | 2,764        |
| W_Yellow2     | AL3194        | AL2135        | -0.0792        | -1.248        | 102         | 120         | 2,764        |
| C_Cal         | AL2135        | AL3194        | -0.0004        | -0.006        | 87          | 87          | 2,794        |
| C_Cal         | AL3194        | AL2135        | 0.0004         | 0.006         | 87          | 87          | 2,794        |
| <b>C_MidW</b> | <b>AL2135</b> | <b>AL3194</b> | <b>-0.1814</b> | <b>-2.034</b> | <b>43</b>   | <b>62</b>   | <b>1,863</b> |
| <b>C_MidW</b> | <b>AL3194</b> | <b>AL2135</b> | <b>0.1814</b>  | <b>2.034</b>  | <b>62</b>   | <b>43</b>   | <b>1,863</b> |
| TAI           | AL2135        | AL3194        | 0.1284         | 1.217         | 53          | 41          | 1,098        |
| TAI           | AL3194        | AL2135        | -0.1284        | -1.217        | 41          | 53          | 1,098        |

**Table S9.**

Sample code used as population name for SNP array analysis.

**Table S10.**

Results of f4 ratio analysis depicted in Figure S18 (see Table S9 for population code).

**Table S11.**

Results of f4 ratio analysis used to estimate proportion of PCD ancestry in Arctic breeds. This table include results for both SNP array and Genome-wide analyses.

**Table S12.**

D-statistics for D(Outgroup, PCD (AL3194), Arctic dogs, Arctic dogs). The Andean Fox was used as an outgroup for these analyses. *n* corresponds to the number of SNPs where all populations have data. Standard error for these statistics was obtained by performing a weighted block jackknife over 1Mb blocks. Statistics with  $Z > 3$  and  $Z < -3$  are shown in bold.

| <b>Pop 3</b>      | <b>Pop 4</b>   | <b>D</b>      | <b>Z</b>     | <b>BABA</b>   | <b>ABBA</b>   | <b>n</b>       |
|-------------------|----------------|---------------|--------------|---------------|---------------|----------------|
| D_Mal68           | D_Green        | 0.0001        | 0.010        | 38,564        | 38,555        | 926,919        |
| D_Husky89         | D_AHusky91     | 0.0059        | 0.416        | 29,524        | 29,174        | 749,696        |
| D_Husky           | D_Husky89      | 0.0166        | 1.254        | 33,365        | 32,275        | 797,067        |
| D_Husky           | D_AHusky91     | 0.0176        | 1.324        | 37,461        | 36,164        | 913,221        |
| <b>D_Husky89</b>  | <b>D_Green</b> | <b>0.0437</b> | <b>3.261</b> | <b>38,311</b> | <b>35,101</b> | <b>790,543</b> |
| <b>D_Husky89</b>  | <b>D_Mal68</b> | <b>0.0455</b> | <b>3.384</b> | <b>39,192</b> | <b>35,781</b> | <b>775,433</b> |
| <b>D_AHusky91</b> | <b>D_Green</b> | <b>0.0470</b> | <b>3.555</b> | <b>44,116</b> | <b>40,158</b> | <b>897,276</b> |
| <b>D_AHusky91</b> | <b>D_Mal68</b> | <b>0.0450</b> | <b>3.596</b> | <b>44,737</b> | <b>40,883</b> | <b>884,940</b> |
| <b>D_Husky</b>    | <b>D_Green</b> | <b>0.0619</b> | <b>5.021</b> | <b>48,948</b> | <b>43,246</b> | <b>955,940</b> |
| <b>D_Husky</b>    | <b>D_Mal68</b> | <b>0.0609</b> | <b>5.050</b> | <b>49,177</b> | <b>43,528</b> | <b>942,665</b> |

**Table S13.**

D-statistics for D(Outgroup, Asian or European Dogs, Arctic dogs, Arctic dogs). The Andean Fox was used as an outgroup for these analyses. *n* corresponds to the number of SNPs where all populations have data. Standard error for these statistics was obtained by performing a weighted block jackknife over 1Mb blocks. Statistics with  $Z > 3$  are shown in bold.

| <b>Pop 2</b> | <b>Pop 3</b> | <b>Pop 4</b> | <b>D</b> | <b>Z</b> | <b>BABA</b> | <b>ABBA</b> | <b>n</b>  |
|--------------|--------------|--------------|----------|----------|-------------|-------------|-----------|
| D_Portt71    | D_AHusky91   | D_Husky89    | 0.0000   | 0.001    | 37,394      | 37,394      | 954,618   |
| D_Portt71    | D_Mal68      | D_Husky89    | 0.0005   | 0.040    | 47,184      | 47,141      | 988,232   |
| D_Portt71    | D_Husky      | D_Mal68      | 0.0009   | 0.086    | 58,360      | 58,259      | 1,190,049 |
| D_Port61     | D_AHusky91   | D_Mal68      | 0.0016   | 0.149    | 55,075      | 54,905      | 1,143,740 |
| D_Port61     | D_Mal68      | D_Husky      | 0.0018   | 0.186    | 59,906      | 59,692      | 1,217,824 |
| D_Portt71    | D_Husky89    | D_Husky      | 0.0026   | 0.250    | 42,139      | 41,923      | 1,014,889 |
| D_Port61     | D_Husky89    | D_Mal68      | 0.0029   | 0.271    | 48,766      | 48,481      | 1,013,144 |
| D_Portt71    | D_AHusky91   | D_Mal68      | 0.0046   | 0.412    | 53,778      | 53,282      | 1,117,362 |
| D_Port61     | D_AHusky91   | D_Husky      | 0.0060   | 0.586    | 48,323      | 47,748      | 1,179,281 |
| D_Portt71    | D_AHusky91   | D_Husky      | 0.0060   | 0.596    | 46,884      | 46,321      | 1,151,944 |
| D_Port61     | D_Husky89    | D_AHusky91   | 0.0077   | 0.675    | 38,794      | 38,202      | 979,116   |
| D_Port61     | D_Husky89    | D_Husky      | 0.0098   | 0.948    | 43,569      | 42,725      | 1,040,592 |
| D_Portt71    | D_Green      | D_AHusky91   | 0.0197   | 1.780    | 53,880      | 51,794      | 1,133,450 |
| D_Portt71    | D_Green      | D_Husky      | 0.0242   | 2.401    | 59,660      | 56,844      | 1,207,389 |

|                 |                |                |               |              |               |               |                  |
|-----------------|----------------|----------------|---------------|--------------|---------------|---------------|------------------|
| D_Portt71       | D_Green        | D_Mal68        | 0.0281        | 2.433        | 49,870        | 47,151        | 1,171,857        |
| D_Portt71       | D_Green        | D_Husky89      | 0.0267        | 2.466        | 47,462        | 44,995        | 1,007,512        |
| D_Port61        | D_Green        | D_Husky89      | 0.0283        | 2.625        | 48,938        | 46,241        | 1,033,241        |
| D_Port61        | D_Green        | D_AHusky91     | 0.0301        | 2.628        | 55,922        | 52,657        | 1,160,778        |
| <b>D_Port61</b> | <b>D_Green</b> | <b>D_Husky</b> | <b>0.0341</b> | <b>3.348</b> | <b>61,488</b> | <b>57,440</b> | <b>1,236,161</b> |
| <b>D_Port61</b> | <b>D_Green</b> | <b>D_Mal68</b> | <b>0.0375</b> | <b>3.355</b> | <b>51,677</b> | <b>47,947</b> | <b>1,199,625</b> |
| D_China8        | D_Husky89      | D_AHusky91     | 0.0017        | 0.158        | 37,346        | 37,218        | 959,372          |
| D_China9        | D_Mal68        | D_AHusky91     | 0.0040        | 0.424        | 52,229        | 51,810        | 1,085,883        |
| D_China9        | D_Green        | D_Husky89      | 0.0063        | 0.586        | 46,453        | 45,871        | 1,003,859        |
| D_China8        | D_Green        | D_Mal68        | 0.0066        | 0.628        | 48,381        | 47,747        | 1,175,269        |
| D_China8        | D_Husky        | D_AHusky91     | 0.0068        | 0.744        | 46,638        | 46,006        | 1,155,853        |
| D_China8        | D_Mal68        | D_Husky        | 0.0071        | 0.780        | 58,261        | 57,441        | 1,193,177        |
| D_China8        | D_Husky        | D_Husky89      | 0.0078        | 0.820        | 42,094        | 41,441        | 1,019,519        |
| D_China9        | D_Husky        | D_Green        | 0.0081        | 0.846        | 57,408        | 56,484        | 1,178,134        |
| D_China9        | D_AHusky91     | D_Husky        | 0.0085        | 0.957        | 45,878        | 45,108        | 1,120,029        |
| D_China9        | D_Mal68        | D_Husky        | 0.0096        | 1.121        | 57,254        | 56,163        | 1,156,324        |
| D_China8        | D_Green        | D_Husky        | 0.0124        | 1.296        | 58,444        | 57,014        | 1,211,379        |
| D_China9        | D_Husky        | D_Husky89      | 0.0141        | 1.428        | 42,263        | 41,090        | 1,009,765        |

|          |            |            |        |       |        |        |           |
|----------|------------|------------|--------|-------|--------|--------|-----------|
| D_China9 | D_AHusky91 | D_Green    | 0.0152 | 1.493 | 52,310 | 50,746 | 1,106,207 |
| D_China8 | D_Mal68    | D_AHusky91 | 0.0146 | 1.553 | 53,877 | 52,324 | 1,120,670 |
| D_China8 | D_Mal68    | D_Husky89  | 0.0160 | 1.601 | 47,812 | 46,307 | 992,341   |
| D_China8 | D_Green    | D_AHusky91 | 0.0193 | 1.872 | 53,594 | 51,565 | 1,137,595 |
| D_China9 | D_Husky89  | D_AHusky91 | 0.0208 | 1.901 | 37,871 | 36,329 | 950,029   |
| D_China9 | D_Mal68    | D_Green    | 0.0205 | 2.167 | 48,324 | 46,381 | 1,142,965 |
| D_China9 | D_Mal68    | D_Husky89  | 0.0224 | 2.288 | 47,913 | 45,810 | 982,870   |
| D_China8 | D_Green    | D_Husky89  | 0.0250 | 2.488 | 47,327 | 45,021 | 1,012,257 |



**Table S14**

Fitting of COSMIC mutational signatures 1, 5, 7 and Dog Germline signature to 1,933,897 CTVT tumor-only SNVs shared between 608T and 609T.

| <b>Mutational signature</b> | <b>Fit</b>          | <b>Number of SNVs<br/>( n=1,933,897)</b> |
|-----------------------------|---------------------|------------------------------------------|
| 1                           | Mean (15.4%)        | 297,820.1                                |
|                             | Lower bound (15.2%) | 293,952.3                                |
|                             | Upper bound (15.5%) | 299,754                                  |
| 5                           | Mean (40.1%)        | 775,492.7                                |
|                             | Lower bound (40.0%) | 773,558.8                                |
|                             | Upper bound (40.3%) | 779,360.5                                |
| 7                           | Mean (38.95%)       | 753,252.9                                |
|                             | Lower bound (38.9%) | 752,285.9                                |
|                             | Upper bound (39%)   | 754,219.8                                |
| Dog Germline                | Mean (5.5%)         | 106,364.3                                |
|                             | Lower bound (5.3%)  | 102,496.5                                |
|                             | Upper bound (5.7%)  | 110,232.1                                |

**Table S15**

Number of clonal tumor-unique SNVs in 608T and 609T. CN, copy number. “All” indicates the complete set of tumor-unique SNVs, “Clonal”, only those that are clonal.

| <b>Sample</b> | <b>Copy number state</b> | <b>All</b> | <b>Clonal</b> |
|---------------|--------------------------|------------|---------------|
| <b>608T</b>   | CN1                      | 40         | 33            |
|               | CN2                      | 140        | 125           |
|               | CN3                      | 22         | 21            |
|               | CN4                      | 3          | 3             |
|               | CN6                      | 1          | 1             |
|               |                          |            | 206           |
| <b>609T</b>   | CN1                      | 43         | 30            |
|               | CN2                      | 159        | 125           |
|               | CN3                      | 21         | 15            |
|               | CN4                      | 5          | 4             |
|               |                          |            | 228           |

**Table S16**

Number of clonal N[C>T]G mutations unique to 608T and 609T, as well as the number found in the somatic lineage from the CTVT founder dog until MRCA<sub>608T-609T</sub>.

| <b>Variant set</b>                          | <b>N[C&gt;T]G mutations</b> |
|---------------------------------------------|-----------------------------|
| Clonal 608T-unique                          | 27                          |
| Clonal 609T-unique                          | 23                          |
| CTVT (origin to MRCA <sub>608T-609T</sub> ) | 222,072                     |

## References and Notes

1. G. Larson, E. K. Karlsson, A. Perri, M. T. Webster, S. Y. W. Ho, J. Peters, P. W. Stahl, P. J. Piper, F. Lingaas, M. Fredholm, K. E. Comstock, J. F. Modiano, C. Schelling, A. I. Agoulnik, P. A. Leegwater, K. Dobney, J.-D. Vigne, C. Vilà, L. Andersson, K. Lindblad-Toh, Rethinking dog domestication by integrating genetics, archeology, and biogeography. *Proc. Natl. Acad. Sci. U.S.A.* **109**, 8878–8883 (2012). [doi:10.1073/pnas.1203005109](https://doi.org/10.1073/pnas.1203005109) [Medline](#)
2. A. Perri, C. Widga, D. Lawler, T. Martin, T. Loebel, K. Farnsworth, L. Kohn, B. Buenger, New evidence of the earliest domestic dogs in the Americas. bioRxiv 343574 [Preprint]. 11 June 2018. <https://doi.org/10.1101/343574>.
3. See supplementary materials.
4. T. Goebel, M. R. Waters, D. H. O'Rourke, The late Pleistocene dispersal of modern humans in the Americas. *Science* **319**, 1497–1502 (2008). [doi:10.1126/science.1153569](https://doi.org/10.1126/science.1153569) [Medline](#)
5. J. A. Leonard, R. K. Wayne, J. Wheeler, R. Valadez, S. Guillén, C. Vilà, Ancient DNA evidence for Old World origin of New World dogs. *Science* **298**, 1613–1616 (2002). [doi:10.1126/science.1076980](https://doi.org/10.1126/science.1076980) [Medline](#)
6. S. K. Brown, C. M. Darwent, E. J. Wictum, B. N. Sacks, Using multiple markers to elucidate the ancient, historical and modern relationships among North American Arctic dog breeds. *Heredity* **115**, 488–495 (2015). [doi:10.1038/hdy.2015.49](https://doi.org/10.1038/hdy.2015.49) [Medline](#)
7. K. E. Witt, K. Judd, A. Kitchen, C. Grier, T. A. Kohler, S. G. Ortman, B. M. Kemp, R. S. Malhi, DNA analysis of ancient dogs of the Americas: Identifying possible founding haplotypes and reconstructing population histories. *J. Hum. Evol.* **79**, 105–118 (2015). [doi:10.1016/j.jhevol.2014.10.012](https://doi.org/10.1016/j.jhevol.2014.10.012) [Medline](#)
8. B. van Asch, A. B. Zhang, M. C. R. Oskarsson, C. F. C. Klütsch, A. Amorim, P. Savolainen, Pre-Columbian origins of Native American dog breeds, with only limited replacement by European dogs, confirmed by mtDNA analysis. *Proc. R. Soc. London Ser. B* **280**, 20131142 (2013). [doi:10.1098/rspb.2013.1142](https://doi.org/10.1098/rspb.2013.1142) [Medline](#)
9. L. M. Shannon, R. H. Boyko, M. Castelhana, E. Corey, J. J. Hayward, C. McLean, M. E. White, M. Abi Said, B. A. Anita, N. I. Bondjengo, J. Calero, A. Galov, M. Hedimbi, B. Imam, R. Khalap, D. Lally, A. Masta, K. C. Oliveira, L. Pérez, J. Randall, N. M. Tam, F. J. Trujillo-Cornejo, C. Valeriano, N. B. Sutter, R. J. Todhunter, C. D. Bustamante, A. R. Boyko, Genetic structure in village dogs reveals a Central Asian domestication origin. *Proc. Natl. Acad. Sci. U.S.A.* **112**, 13639–13644 (2015). [doi:10.1073/pnas.1516215112](https://doi.org/10.1073/pnas.1516215112) [Medline](#)
10. M. Raghavan, M. Steinrücken, K. Harris, S. Schiffels, S. Rasmussen, M. DeGiorgio, A. Albrechtsen, C. Valdiosera, M. C. Ávila-Arcos, A.-S. Malaspina, A. Eriksson, I. Moltke, M. Metspalu, J. R. Homburger, J. Wall, O. E. Cornejo, J. V. Moreno-Mayar, T. S. Korneliussen, T. Pierre, M. Rasmussen, P. F. Campos, P. de Barros Damgaard, M. E. Allentoft, J. Lindo, E. Metspalu, R. Rodríguez-Varela, J. Mansilla, C. Henrickson, A. Seguin-Orlando, H. Malmström, T. Stafford Jr., S. S. Shringarpure, A. Moreno-Estrada, M. Karmin, K. Tambets, A. Bergström, Y. Xue, V. Warmuth, A. D. Friend, J. Singarayer, P. Valdes, F. Balloux, I. Lebreiro, J. L. Vera, H. Rangel-Villalobos, D. Pettener, D. Luiselli, L. G. Davis, E. Heyer, C. P. E. Zollikofer, M. S. Ponce de León, C. I. Smith, V. Grimes, K. A. Pike, M. Deal, B. T. Fuller, B. Arriaza, V. Standen, M. F. Luz, F. Ricaut, N. Guidon, L. Osipova, M. I. Voevoda, O. L. Posukh, O. Balanovsky, M. Lavryashina, Y. Bogunov, E. Khusnutdinova, M. Gubina, E. Balanovska, S. Fedorova, S. Litvinov, B. Malyarchuk, M. Derenko, M. J. Mosher, D. Archer, J. Cybulski, B. Petzelt, J. Mitchell, R. Worl, P. J. Norman, P. Parham, B. M. Kemp, T. Kivisild, C. Tyler-Smith, M. S. Sandhu, M. Crawford,

- R. Villems, D. G. Smith, M. R. Waters, T. Goebel, J. R. Johnson, R. S. Malhi, M. Jakobsson, D. J. Meltzer, A. Manica, R. Durbin, C. D. Bustamante, Y. S. Song, R. Nielsen, E. Willerslev, Genomic evidence for the Pleistocene and recent population history of Native Americans. *Science* **349**, aab3884 (2015). [doi:10.1126/science.aab3884](https://doi.org/10.1126/science.aab3884) [Medline](#)
11. M. Jakobsson, C. Pearce, T. M. Cronin, J. Backman, L. G. Anderson, N. Barrientos, G. Björk, H. Coxall, A. de Boer, L. A. Mayer, C.-M. Mörth, J. Nilsson, J. E. Rattray, C. Stranne, I. Semiletov, M. O'Regan, Post-glacial flooding of the Bering Land Bridge dated to 11 cal ka BP based on new geophysical and sediment records. *Clim. Past*, **13**, 991–1005 (2017). [doi:10.5194/cp-13-991-2017](https://doi.org/10.5194/cp-13-991-2017)
  12. J. V. Moreno-Mayar, B. A. Potter, L. Vinner, M. Steinrücken, S. Rasmussen, J. Terhorst, J. A. Kamm, A. Albrechtsen, A.-S. Malaspinas, M. Sikora, J. D. Reuther, J. D. Irish, R. S. Malhi, L. Orlando, Y. S. Song, R. Nielsen, D. J. Meltzer, E. Willerslev, Terminal Pleistocene Alaskan genome reveals first founding population of Native Americans. *Nature* **553**, 203–207 (2018). [doi:10.1038/nature25173](https://doi.org/10.1038/nature25173) [Medline](#)
  13. Z. Fan, P. Silva, I. Gronau, S. Wang, A. S. Armero, R. M. Schweizer, O. Ramirez, J. Pollinger, M. Galaverni, D. Ortega Del-Vecchyo, L. Du, W. Zhang, Z. Zhang, J. Xing, C. Vilà, T. Marques-Bonet, R. Godinho, B. Yue, R. K. Wayne, Worldwide patterns of genomic variation and admixture in gray wolves. *Genome Res.* **26**, 163–173 (2016). [doi:10.1101/gr.197517.115](https://doi.org/10.1101/gr.197517.115) [Medline](#)
  14. G.-D. Wang, W. Zhai, H.-C. Yang, L. Wang, L. Zhong, Y.-H. Liu, R.-X. Fan, T.-T. Yin, C.-L. Zhu, A. D. Poyarkov, D. M. Irwin, M. K. Hytönen, H. Lohi, C.-I. Wu, P. Savolainen, Y.-P. Zhang, Out of southern East Asia: The natural history of domestic dogs across the world. *Cell Res.* **26**, 21–33 (2016). [doi:10.1038/cr.2015.147](https://doi.org/10.1038/cr.2015.147) [Medline](#)
  15. A. H. Freedman, I. Gronau, R. M. Schweizer, D. Ortega-Del Vecchyo, E. Han, P. M. Silva, M. Galaverni, Z. Fan, P. Marx, B. Lorente-Galdos, H. Beale, O. Ramirez, F. Hormozdiari, C. Alkan, C. Vilà, K. Squire, E. Geffen, J. Kusak, A. R. Boyko, H. G. Parker, C. Lee, V. Tadigotla, A. Wilton, A. Siepel, C. D. Bustamante, T. T. Harkins, S. F. Nelson, E. A. Ostrander, T. Marques-Bonet, R. K. Wayne, J. Novembre, Genome sequencing highlights the dynamic early history of dogs. *PLoS Genet.* **10**, e1004016 (2014). [doi:10.1371/journal.pgen.1004016](https://doi.org/10.1371/journal.pgen.1004016) [Medline](#)
  16. L. A. F. Frantz, V. E. Mullin, M. Pionnier-Capitan, O. Lebrasseur, M. Ollivier, A. Perri, A. Linderholm, V. Mattiangeli, M. D. Teasdale, E. A. Dimopoulos, A. Tresset, M. Duffraisse, F. McCormick, L. Bartosiewicz, E. Gál, É. A. Nyerges, M. V. Sablin, S. Bréhard, M. Mashkour, A. Bălăşescu, B. Gillet, S. Hughes, O. Chassaing, C. Hitte, J.-D. Vigne, K. Dobney, C. Hänni, D. G. Bradley, G. Larson, Genomic and archaeological evidence suggest a dual origin of domestic dogs. *Science* **352**, 1228–1231 (2016). [doi:10.1126/science.aaf3161](https://doi.org/10.1126/science.aaf3161) [Medline](#)
  17. B. M. vonHoldt, J. P. Pollinger, K. E. Lohmueller, E. Han, H. G. Parker, P. Quignon, J. D. Degenhardt, A. R. Boyko, D. A. Earl, A. Auton, A. Reynolds, K. Bryc, A. Brisbin, J. C. Knowles, D. S. Mosher, T. C. Spady, A. Elkahoun, E. Geffen, M. Pilot, W. Jedrzejewski, C. Greco, E. Randi, D. Bannasch, A. Wilton, J. Shearman, M. Musiani, M. Cargill, P. G. Jones, Z. Qian, W. Huang, Z.-L. Ding, Y. P. Zhang, C. D. Bustamante, E. A. Ostrander, J. Novembre, R. K. Wayne, Genome-wide SNP and haplotype analyses reveal a rich history underlying dog domestication. *Nature* **464**, 898–902 (2010). [doi:10.1038/nature08837](https://doi.org/10.1038/nature08837) [Medline](#)
  18. J. K. Pickrell, J. K. Pritchard, Inference of population splits and mixtures from genome-wide allele frequency data. *PLoS Genet.* **8**, e1002967 (2012). [doi:10.1371/journal.pgen.1002967](https://doi.org/10.1371/journal.pgen.1002967) [Medline](#)

19. M. Raghavan, M. DeGiorgio, A. Albrechtsen, I. Moltke, P. Skoglund, T. S. Korneliussen, B. Grønnow, M. Appelt, H. C. Gulløv, T. M. Friesen, W. Fitzhugh, H. Malmström, S. Rasmussen, J. Olsen, L. Melchior, B. T. Fuller, S. M. Fahrni, T. Stafford Jr., V. Grimes, M. A. P. Renouf, J. Cybulski, N. Lynnerup, M. M. Lahr, K. Britton, R. Knecht, J. Arneborg, M. Metspalu, O. E. Cornejo, A.-S. Malaspinas, Y. Wang, M. Rasmussen, V. Raghavan, T. V. O. Hansen, E. Khusnutdinova, T. Pierre, K. Dneprovsky, C. Andreasen, H. Lange, M. G. Hayes, J. Coltrain, V. A. Spitsyn, A. Götherström, L. Orlando, T. Kivisild, R. Villems, M. H. Crawford, F. C. Nielsen, J. Dissing, J. Heinemeier, M. Meldgaard, C. Bustamante, D. H. O'Rourke, M. Jakobsson, M. T. P. Gilbert, R. Nielsen, E. Willerslev, The genetic prehistory of the New World Arctic. *Science* **345**, 1255832 (2014). [doi:10.1126/science.1255832](https://doi.org/10.1126/science.1255832) [Medline](#)
20. E. P. Murchison, D. C. Wedge, L. B. Alexandrov, B. Fu, I. Martincorena, Z. Ning, J. M. C. Tubio, E. I. Werner, J. Allen, A. B. De Nardi, E. M. Donelan, G. Marino, A. Fassati, P. J. Campbell, F. Yang, A. Burt, R. A. Weiss, M. R. Stratton, Transmissible dog cancer genome reveals the origin and history of an ancient cell lineage. *Science* **343**, 437–440 (2014). [doi:10.1126/science.1247167](https://doi.org/10.1126/science.1247167) [Medline](#)
21. A. Strakova, M. Ní Leathlobhair, G.-D. Wang, T.-T. Yin, I. Airikkala-Otter, J. L. Allen, K. M. Allum, L. Bansse-Issa, J. L. Bisson, A. Castillo Domracheva, K. F. de Castro, A. M. Corrigan, H. R. Cran, J. T. Crawford, S. M. Cutter, L. Delgadillo Keenan, E. M. Donelan, I. A. Faramade, E. Flores Reynoso, E. Fotopoulou, S. N. Fruean, F. Gallardo-Arrieta, O. Glebova, R. F. Häfelin Manrique, J. J. G. P. Henriques, N. Ignatenko, D. Koenig, M. Lanza-Perea, R. Lobetti, A. M. Lopez Quintana, T. Losfelt, G. Marino, I. Martincorena, S. Martínez Castañeda, M. F. Martínez-López, M. Meyer, B. Nakanwagi, A. B. De Nardi, W. Neunzig, S. J. Nixon, M. M. Onsare, A. Ortega-Pacheco, M. C. Peleteiro, R. J. Pye, J. F. Reece, J. Rojas Gutierrez, H. Sadia, S. K. Schmeling, O. Shamanova, R. K. Ssuna, A. E. Steenland-Smit, A. Svitich, I. Thoya Ngoka, B. A. Vițălaru, A. P. de Vos, J. P. de Vos, O. Walkinton, D. C. Wedge, A. S. Wehrle-Martinez, M. G. van der Wel, S. A. E. Widdowson, E. P. Murchison, Mitochondrial genetic diversity, selection and recombination in a canine transmissible cancer. *Elife* **5**, e14552 (2016). [doi:10.7554/eLife.14552](https://doi.org/10.7554/eLife.14552) [Medline](#)
22. C. A. Rebbeck, A. M. Leroi, A. Burt, Mitochondrial capture by a transmissible cancer. *Science* **331**, 303 (2011). [doi:10.1126/science.1197696](https://doi.org/10.1126/science.1197696) [Medline](#)
23. T. M. Anderson, B. M. vonHoldt, S. I. Candille, M. Musiani, C. Greco, D. R. Stahler, D. W. Smith, B. Padhukasahasram, E. Randi, J. A. Leonard, C. D. Bustamante, E. A. Ostrander, H. Tang, R. K. Wayne, G. S. Barsh, Molecular and evolutionary history of melanism in North American gray wolves. *Science* **323**, 1339–1343 (2009). [doi:10.1126/science.1165448](https://doi.org/10.1126/science.1165448) [Medline](#)
24. H. G. Parker, D. L. Dreger, M. Rimbault, B. W. Davis, A. B. Mullen, G. Carpintero-Ramirez, E. A. Ostrander, Genomic analyses reveal the influence of geographic origin, migration, and hybridization on modern dog breed development. *Cell Rep.* **19**, 697–708 (2017). [doi:10.1016/j.celrep.2017.03.079](https://doi.org/10.1016/j.celrep.2017.03.079) [Medline](#)
25. M. Derr, *A Dog's History of America: How Our Best Friend Explored, Conquered, and Settled a Continent* (Farrar, Straus and Giroux, 2005).
26. M. Ní Leathlobhair, A. R. Perri, E. K. Irving-Pease, K. E. Witt, A. Linderholm, J. Haile, O. Lebrasseur, C. Ameen, J. Blick, A. R. Boyko, S. Brace, Y. N. Cortes, S. J. Crockford, A. Devault, E. A. Dimopoulos, M. Eldridge, J. Enk, S. Gopalakrishnan, K. Gori, V. Grimes, E. Guiry, A. J. Hansen, A. Hulme-Beaman, J. Johnson, A. Kitchen, A. K. Kasparov, Y.-M. Kwon, P. A. Nikolskiy, C. Peraza Lope, A. Manin, T. Martin, M. Meyer, K. N. Myers, M. Omura, J.-M. Rouillard, E. Y. Pavlova, P. Sciulli, M.-H. S. Sinding, A. Strakova, V. V. Ivanova, C. Widga, E. Willerslev, V. V. Pitulko, I. Barnes, M. T. P. Gilbert, K. M. Dobney,

- R. S. Malhi, E. P. Murchison, G. Larson, L. A. F. Frantz, The evolutionary history of dogs in the Americas, *Dryad* (2018); [doi:10.5061/dryad.s1k47j4](https://doi.org/10.5061/dryad.s1k47j4).
27. E. J. Lee, D. A. Merriwether, A. K. Kasparov, P. A. Nikolskiy, M. V. Sotnikova, E. Y. Pavlova, V. V. Pitulko, Ancient DNA analysis of the oldest canid species from the Siberian Arctic and genetic contribution to the domestic dog. *PLOS ONE* **10**, e0125759 (2015). [doi:10.1371/journal.pone.0125759](https://doi.org/10.1371/journal.pone.0125759) [Medline](#)
  28. S. Peterson, thesis, Indiana University (2010).
  29. G. Monaghan, C. Peebles, The construction, use, and abandonment of Angel site Mound A: Tracing the history of a Middle Mississippian town through its earthworks. *Am. Antiq.* **75**, 935–953 (2010). [doi:10.7183/0002-7316.75.4.935](https://doi.org/10.7183/0002-7316.75.4.935)
  30. E. A. Bluhm, A. Liss, “The Anker site,” in *Chicago Area Archaeology*, E. A. Bluhm, Ed. (Bulletin 3, Illinois Archaeological Survey, 1961), pp. 89–138.
  31. P. W. Parmalee, A. A. Paloumpis, N. Wilson, “Animals utilized by woodland peoples occupying the Apple Creek site, Illinois” (Report of Investigations 23, Illinois State Museum, 1972).
  32. J. B. Griffin, “Late prehistory of the Ohio Valley,” in *Handbook of the North American Indians*, vol. 15, *Northeast*, B. G. Trigger, Ed. (Smithsonian Institution, 1978), pp. 547–559.
  33. F. Church, J. P. Nass Jr., “Central Ohio Valley during the Late Prehistoric Period: Subsistence-settlement systems’ responses to risk,” in *Northeast Subsistence-Settlement Change: A.D. 700–1300*, J. P. Hart and C. B. Rieth, Eds. (New York State Museum Bulletin 496, New York State Education Department, 2002), pp. 11–42.
  34. W. C. Mills, *Explorations of the Baum Prehistoric Village Site* (F. J. Heer, 1906).
  35. J. B. Griffin, Fort Ancient has no class: The absence of an elite group in Mississippian societies in the Central Ohio Valley. *Archaeol. Pap. Am. Anthropol. Assoc.* **3**, 53–59 (1992). [doi:10.1525/ap3a.1992.3.1.53](https://doi.org/10.1525/ap3a.1992.3.1.53)
  36. E. G. Squier, E. H. Davis, *Ancient Monuments of the Mississippi Valley: Comprising the Results of Extensive Original Surveys and Explorations* (Smithsonian Institution, 1848).
  37. C. B. Moore, in *Additional Mounds of Duval and Clay Counties, Florida. Mound Investigation on the East Coast of Florida. Certain Florida Coast Mounds North of the St. John’s River* (Journal of the Academy of Natural Sciences of Philadelphia, 1896), pp. 26–27.
  38. D. F. Morey, Burying key evidence: The social bond between dogs and people. *J. Archaeol. Sci.* **33**, 158–175 (2006). [doi:10.1016/j.jas.2005.07.009](https://doi.org/10.1016/j.jas.2005.07.009)
  39. K. Nolan, P. Sculli, Rejoinder to Sciulli and Purcell: Two Late Prehistoric dogs from the Reinhardt site (33PI880), Pickaway County, Ohio. *Pa. Archaeol.* **84**, 65–73 (2014).
  40. C. B. Moore, Aboriginal sites on Tennessee river. *J. Acad. Nat. Sci. Phila.* **16**, 169–428 (1915).
  41. T. C. Rick, J. M. Erlandson, R. L. Vellanoweth, T. J. Braje, From Pleistocene mariners to complex hunter-gatherers: The archaeology of the California Channel Islands. *J. World Prehist.* **19**, 169–228 (2005). [doi:10.1007/s10963-006-9004-x](https://doi.org/10.1007/s10963-006-9004-x)
  42. T. C. Rick, P. L. Walker, L. M. Willis, A. C. Noah, J. M. Erlandson, R. L. Vellanoweth, T. J. Braje, D. J. Kennett, Dogs, humans and island ecosystems: The distribution, antiquity and ecology of domestic dogs (*Canis familiaris*) on California’s Channel Islands, USA. *The Holocene* **18**, 1077–1087 (2008). [doi:10.1177/0959683608095579](https://doi.org/10.1177/0959683608095579)
  43. W. S. Webb, D. L. DeJarnette, “The Flint River site” (Museum Paper 23, Geological Survey of Alabama, 1948).

44. D. M. Warren, thesis, Indiana University (2004).
45. W. D. Lipe, J. N. Morris, T. A. Kohler, *Dolores Archaeological Program: Anasazi Communities at Dolores: Grass Mesa Village* [U.S. Department of the Interior (USDI) Bureau of Reclamation, Engineering and Research Center, 1988].
46. J. M. Galloy, Part V: Woodland period: The Janey B. Goode site (11S1232): Highlights of investigations at a massive Late Prehistoric site in the American Bottom. *Ill. Archaeol.* **22**, 529–552 (2010).
47. Q. L. Borgic, J. M. Galloy, “Domesticated dog remains from the Janey B. Goode site,” paper presented at the 2004 Joint Midwest Archaeological and Southeastern Archaeological Conference, St. Louis, MO, 21 to 23 October 2004.
48. G. L. Houart, “Koster: A stratified Archaic site in the Illinois Valley” (Report of Investigations 1, Illinois State Museum, 1971).
49. K. W. Butzer, Changing Holocene environments at the Koster site: A geo-archaeological perspective. *Am. Antiq.* **43**, 408–413 (1978). [doi:10.2307/279397](https://doi.org/10.2307/279397)
50. J. E. Buikstra, in *The Archaeology of Death*, R. Chapman, I. Kinnes, K. Randsborg, Eds. (Cambridge Univ. Press, 1981), pp. 123–132.
51. E. R. Hajic, *Koster Site Archaeology I: Stratigraphy and Landscape Evolution* (Center for American Archeology, 1990).
52. S. Struever, F. A. Holton, *Koster: Americans in Search of Their Prehistoric Past* (Anchor Press, 1979).
53. J. A. Brown, R. K. Vierra, *What Happened in the Middle Archaic? Introduction to an Ecological Approach to Koster Site Archaeology* (Academic Press, 1983).
54. R. J. Jeske, R. Lurie, The archaeological visibility of bipolar technology: An example from the Koster site. *Midcont. J. Archaeol.* **18**, 131–160 (1993).
55. A. L. Boon, thesis, Indiana University of Pennsylvania (2013).
56. E. R. Hajic, in *Encyclopedia of Geoarchaeology*, A. S. Gilbert, Ed. (Encyclopedia of Earth Sciences Series, Springer, 2017), pp. 457–458.
57. M. D. Wiant, K. B. Farnsworth, E. R. Hajic, “The Archaic period in the lower Illinois river basin,” in *Archaic Societies: Diversity and Complexity across the Midcontinent*, T. E. Emerson, D. L. McElrath, A. C. Fortier, Eds. (State Univ. of New York, 2009), pp. 229–286.
58. D. F. Morey, M. D. Wiant, Early Holocene domestic dog burials from the North American Midwest. *Curr. Anthropol.* **33**, 224–229 (1992). [doi:10.1086/204059](https://doi.org/10.1086/204059)
59. F. C. Hill, *A Middle Archaic Dog Burial in Illinois* (Foundation for Illinois Archaeology, 1972).
60. W. S. Webb, D. L. DeJarnette, “Little Bear Creek site” (Museum Paper 26, Geological Survey of Alabama, 1948).
61. F. S. Barkalow Jr., Vertebrate remains from archaeological sites in the Tennessee Valley of Alabama. *South. Indian Stud.* **24**, 3–41 (1972).
62. C. Peraza Lope, M. A. Masson, T. S. Hare, P. C. Delgado Ku, The chronology of Mayapan: New radiocarbon evidence. *Anc. Mesoam.* **17**, 153–176 (2006). [doi:10.1017/S0956536106060135](https://doi.org/10.1017/S0956536106060135)
63. H. E. D. Pollock, R. L. Roys, T. Proskouriakoff, A. L. Smith, in *Mayapan, Yucatan, Mexico* (Publication 619, Carnegie Institute of Washington, 1962), p. 87.



64. M. A. Masson, C. Peraza Lope, Animal use at the Postclassic Maya center of Mayapan. *Quat. Int.* **191**, 170–183 (2008). [doi:10.1016/j.quaint.2008.02.002](https://doi.org/10.1016/j.quaint.2008.02.002)
65. A. E. Kane, C. K. Robinson, *Dolores Archaeological Program: Anasazi Communities at Dolores: McPhee Village* (USDI Bureau of Reclamation, Engineering and Research Center, 1988).
66. M. L. Fowler, Modoc rock shelter: An early Archaic site in southern Illinois. *Am. Antiq.* **24**, 257–270 (1959). [doi:10.2307/277379](https://doi.org/10.2307/277379)
67. P. W. Parmalee, “Appendix II: animal remains from the Modoc rock shelter site, Randolph County, Illinois,” in *Summary Report of Modoc Rock Shelter*, M. L. Fowler, Ed. (Report of Investigations 8, Illinois State Museum, 1959), pp. 61–63.
68. W. S. Webb, D. L. DeJarnette, “The Perry site, Lu25” (Museum Paper 25, Geological Survey of Alabama, 1948).
69. E. Futato, Middle and Late Archaic settlement at the Perry site, 1LU25, Lauderdale County, Alabama. *J. Ala. Archaeol.* **48**, 80–92 (2002).
70. J. A. Tuck, Archaic Indian cemetery in Newfoundland. *Sci. Am.* **222**, 112–121 (1970). [doi:10.1038/scientificamerican0670-112](https://doi.org/10.1038/scientificamerican0670-112)
71. J. A. Tuck, An Archaic cemetery at Port au Choix, Newfoundland. *Am. Antiq.* **36**, 343–358 (1971). [doi:10.2307/277719](https://doi.org/10.2307/277719)
72. J. A. Tuck, *Ancient People of Port au Choix: The Excavation of an Archaic Indian Cemetery in Newfoundland* (Institute of Social and Economic Research, Memorial Univ. of Newfoundland, 1976).
73. B. C. Hood, The maritime Archaic Indians of Labrador: Investigating prehistoric social organization. *Newfoundl. Labrador Stud.* **9** (2), 163–184 (1993).
74. M. A. P. Renouf, Palaeoeskimo seal hunters at Port au Choix, Northwestern Newfoundland. *Newfoundl. Labrador Stud.* **9** (2), 185–212 (1993).
75. E. J. Guiry, V. Grimes, Domestic dog (*Canis familiaris*) diets among coastal Late Archaic groups of northeastern North America: A case study for the canine surrogacy approach. *J. Anthropol. Archaeol.* **32**, 732–745 (2013). [doi:10.1016/j.jaa.2013.04.005](https://doi.org/10.1016/j.jaa.2013.04.005)
76. A. Perri, “A typology of dog deposition in archaeological contexts,” in *Economic Zooarchaeology: Studies in Hunting, Herding and Early Agriculture*, P. Rowley-Conwy, D. Serjeantson, P. Halstead, Eds. (Oxbow, 2017), pp. 89–99.
77. G. M. Allen, *Dogs of the American Aborigines* (Bulletin vol. 63, no. 9, Museum of Comparative Zoology at Harvard College, 1920).
78. W. A. Ritchie, *An Early Site in Cayuga County, New York* (Research Records 7, Rochester Museum of Arts and Sciences, 1945).
79. M. Eldridge, A. Parker, C. Mueller, S. Crockford, “Archaeological investigations at Ya asqalu’i/Kaien Siding, Prince Rupert Harbour” (Report prepared for the Canadian National Railway, Millennia Research, 2014).
80. A. Parker, M. Eldridge, in *Proceedings of the 42nd Annual Conference on Computer Applications and Quantitative Methods in Archaeology*, F. Giligny, F. Djindjian, L. Costa, P. Moscati, S. Rober, Eds. (Archaeopress, 2014), pp. 114–122.
81. S. J. Crockford, “Analysis of the vertebrate fauna from neighbouring Prince Rupert Harbour sites GbTo-54 and GbTo-13: Prehistoric mountain goat capital of North America,” in “Archaeological investigations at Ya asqalu’i/Kaien Siding, Prince Rupert Harbour” (Report prepared for the Canadian National Railway, Millennia Research, 2014), p. A3-1–A3-313.

82. K. C. Nolan, Distributional survey of the Reinhardt site (33PI880), Pickaway County, Ohio: A strategy for deciphering the community structure of a Fort Ancient village. *Midcont. J. Archaeol.* **36**, 105–130 (2011). [doi:10.1179/mca.2011.005](https://doi.org/10.1179/mca.2011.005)
83. K. C. Nolan, “Archaeological survey of the Reinhardt tract property through a certified local government (CLG) grant on behalf of the City of Columbus in Harrison Township, Pickaway County, Ohio, volume I: Survey results” (Report submitted to the Ohio Historic Preservation Office, Ohio State Univ. Department of Anthropology, 2009).
84. K. C. Nolan, R. A. Cook, An evolutionary model of social change in the Middle Ohio Valley: Was social complexity impossible during the late woodland but mandatory during the late prehistoric? *J. Anthropol. Archaeol.* **29**, 62–79 (2010). [doi:10.1016/j.jaa.2009.10.004](https://doi.org/10.1016/j.jaa.2009.10.004)
85. J. E. Kerber, Native American treatment of dogs in northeastern North America: Archaeological and ethnohistorical perspectives. *Archaeol. East. North Am.* **25**, 81–95 (1997).
86. R. A. Cook, Dogs of war: Potential social institutions of conflict, healing, and death in a Fort Ancient village. *Am. Antiq.* **77**, 498–523 (2012). [doi:10.7183/0002-7316.77.3.498](https://doi.org/10.7183/0002-7316.77.3.498)
87. M. A. Potter, R. S. Baby, Hopewellian dogs. *Ohio J. Sci.* **64**, 36–40 (1964).
88. W. D. Frankforter, G. A. Agogino, The Simonsen site: Report for the summer of 1959. *Plains Anthropol.* **5** (10), 65–70 (1960). [doi:10.1080/2052546.1960.11908216](https://doi.org/10.1080/2052546.1960.11908216)
89. G. A. Agogino, W. D. Frankforter, A Paleo-Indian bison-kill in northwestern Iowa. *Am. Antiq.* **25**, 414–415 (1960). [doi:10.2307/277531](https://doi.org/10.2307/277531)
90. J. C. Equihua, “Proyecto salvamento arqueológico Tizayuca 2006. Informe. Secuencias estratigráficas y conjuntos arquitectónicos, tomo I” (Tech. Rep., Instituto Nacional de Antropología e Historia, 2008).
91. A. Manin, thesis, Muséum National d’Histoire Naturelle (2015).
92. A. Hrdlička, *The Anthropology of Kodiak Island* (Wistar Institute of Anatomy and Biology, 1944).
93. R. F. Heizer, *Archaeology of the Uyak Site, Kodiak Island, Alaska* (Univ. of California Press, 1956).
94. A. F. Steffian, Fifty years after Hrdlička: Further investigations at the Uyak site, Kodiak Island, Alaska. *Anthropol. Pap. Univ. Alaska* **24**, 141–164 (1992).
95. C. F. West, K. N. Jarvis, Osteometric variation in domestic dogs (*Canis familiaris*) from the Kodiak archipelago, Alaska. *Int. J. Osteoarchaeol.* **25**, 289–298 (2015). [doi:10.1002/oa.2293](https://doi.org/10.1002/oa.2293)
96. G. M. Allen, Dog skulls from Uyak Bay, Kodiak Island. *J. Mammal.* **20**, 336–340 (1939). [doi:10.2307/1374260](https://doi.org/10.2307/1374260)
97. G. R. Scott, Affinities of prehistoric and modern Kodiak Islanders and the question of Kachemak-Koniag biological continuity. *Arctic Anthropol.* **29**, 150–166 (1992).
98. D. W. Clark, F. A. Milan, *Contributions to the Later Prehistory of Kodiak Island, Alaska* (National Museum of Man Mercury Series 20, National Museums of Canada, 1974).
99. C. F. West, C. A. France, Human and canid dietary relationships: Comparative stable isotope analysis from the Kodiak Archipelago, Alaska. *J. Ethnobiol.* **35**, 519–535 (2015). [doi:10.2993/etbi-35-03-519-535.1](https://doi.org/10.2993/etbi-35-03-519-535.1)
100. C. P. Groves, The advantages and disadvantages of being domesticated. *Perspect. Hum. Biol.* **4**, 1–12 (1999).
101. P. S. C. Tacon, C. Pardoe, Dogs make us human. *Nat. Australia* **27** (4), 52–61 (2002).

102. F. J. Simoons, *Eat Not This Flesh: Food Avoidances from Prehistory to the Present* (Univ. of Wisconsin Press, 1994).
103. L. B. Gregory, The Hatch site: A preliminary report. *Q. Bull. Va. Archeol. Soc.* **34**, 239–248 (1980).
104. E. S. Gregory, Weyanoke Old Town. *Q. Bull. Va. Archeol. Soc.* **41**, 49–71 (1986).
105. J. P. Blick, “The archaeology and ethnohistory of the dog in Virginia Algonquian culture as seen from Weyanoke Old Town,” in *Papers of the Thirty-First Algonquian Conference*, J. D. Nichols, Ed. (Univ. of Manitoba, 2000), pp. 1–17.
106. C. F. Feest, *The Virginia Indian in Pictures, 1612–1624* (Smithsonian Institution, 1967).
107. B. C. McCary, *Indians in Seventeenth-Century Virginia* (Univ. Press of Virginia, 1957).
108. J. P. Blick, A preliminary report on the osteometric analysis of some aboriginal dogs (*Canis familiaris*) from Weyanoke Old Town, 44 PG 51, Prince George County, Virginia. *Bull. Am. Assoc. Hist. Nurs.* **43**, 1–17 (1988).
109. H. C. Rountree, *Pocahontas’s People: The Powhatan Indians of Virginia through Four Centuries* (Univ. of Oklahoma Press, 1990).
110. R. Beverley, *The History and Present State of Virginia*, S. S. Parrish, Ed. (Univ. of North Carolina Press, new ed., 2014).
111. C. F. Feest, *Virginia Algonquians* (Smithsonian Institution, 1978).
112. W. A. Ritchie, *The Archaeology of New York State* (Knopf Doubleday, 1965).
113. J. A. Strong, Late Woodland dog ceremonialism on Long Island in comparative and temporal perspective. *Bull. J. N. Y. State Archeol. Assoc.* **91**, 32–38 (1985).
114. A. Perri, thesis, Durham University (2013).
115. W. D. Wallis, *The Micmac Indians of Eastern Canada* (Univ. of Minnesota Press, 1955).
116. J. E. Kerber, A. D. Leveillee, R. L. Greenspan, An unusual dog burial feature at the Lambert farm site, Warwick, Rhode Island: Preliminary observations. *Archaeol. East. North Am.* **17**, 165–174 (1989).
117. T. Hariot, *A Briefe and True Report of the New Found Land of Virginia* (1588).
118. W. Strachey, *The History of Travel into Virginia Britannia* (Hakluyt Society, 1612).
119. J. Smith, *The Generall Historie of Virginia, New-England, and the Summer Isles* (1624).
120. J. Brereton, *True Relation of the Discoveries of the North Part of Virginia* (1602).
121. P. Hulton, *America 1585: The Complete Drawings of John White* (Univ. of North Carolina Press, 1984).
122. K. A. Kuckelman, Ed., *The Archaeology of Yellow Jacket Pueblo: Excavations at a Large Community Center in Southwestern Colorado* (Crow Canyon Archaeological Center, 2003); <http://www.crowcanyon.org/yellowjacket>.
123. V. V. Pitulko, A. Kasparov, Ancient Arctic hunters: Material culture and survival strategy. *Arctic Anthropol.* **33**, 1–36 (1996).
124. V. V. Pitulko, A. K. Kasparov, Archaeological dogs from the Early Holocene Zhokhov site in the Eastern Siberian Arctic. *J. Archaeol. Sci. Rep.* **13**, 491–515 (2017). [doi:10.1016/j.jasrep.2017.04.003](https://doi.org/10.1016/j.jasrep.2017.04.003)
125. J. Dabney, M. Knapp, I. Glocke, M.-T. Gansauge, A. Weihmann, B. Nickel, C. Valdiosera, N. García, S. Pääbo, J.-L. Arsuaga, M. Meyer, Complete mitochondrial genome sequence of a

- Middle Pleistocene cave bear reconstructed from ultrashort DNA fragments. *Proc. Natl. Acad. Sci. U.S.A.* **110**, 15758–15763 (2013). [doi:10.1073/pnas.1314445110](https://doi.org/10.1073/pnas.1314445110) [Medline](#)
126. P. B. Damgaard, A. Margaryan, H. Schroeder, L. Orlando, E. Willerslev, M. E. Allentoft, Improving access to endogenous DNA in ancient bones and teeth. *Sci. Rep.* **5**, 11184 (2015). [doi:10.1038/srep11184](https://doi.org/10.1038/srep11184) [Medline](#)
127. M. Meyer, M. Kircher, Illumina sequencing library preparation for highly multiplexed target capture and sequencing. *Cold Spring Harb. Protoc.* **2010**, pdb.prot5448 (2010). [doi:10.1101/pdb.prot5448](https://doi.org/10.1101/pdb.prot5448) [Medline](#)
128. M. E. Allentoft, M. Sikora, K.-G. Sjögren, S. Rasmussen, M. Rasmussen, J. Stenderup, P. B. Damgaard, H. Schroeder, T. Ahlström, L. Vinner, A.-S. Malaspinas, A. Margaryan, T. Higham, D. Chivall, N. Lynnerup, L. Harvig, J. Baron, P. Della Casa, P. Dąbrowski, P. R. Duffy, A. V. Ebel, A. Epimakhov, K. Frei, M. Furmanek, T. Gralak, A. Gromov, S. Gronkiewicz, G. Grupe, T. Hajdu, R. Jarysz, V. Khartanovich, A. Khokhlov, V. Kiss, J. Kolář, A. Kriiska, I. Lasak, C. Longhi, G. McGlynn, A. Merkevicius, I. Merkyte, M. Metspalu, R. Mkrtychyan, V. Moiseyev, L. Paja, G. Pálfi, D. Pokutta, Ł. Pospieszny, T. D. Price, L. Saag, M. Sablin, N. Shishlina, V. Smrčka, V. I. Soenov, V. Szeverényi, G. Tóth, S. V. Trifanova, L. Varul, M. Vicze, L. Yepiskoposyan, V. Zhitenev, L. Orlando, T. Sicheritz-Pontén, S. Brunak, R. Nielsen, K. Kristiansen, E. Willerslev, Population genomics of Bronze Age Eurasia. *Nature* **522**, 167–172 (2015). [doi:10.1038/nature14507](https://doi.org/10.1038/nature14507) [Medline](#)
129. S. Lindgreen, AdapterRemoval: Easy cleaning of next-generation sequencing reads. *BMC Res. Notes* **5**, 337 (2012). [doi:10.1186/1756-0500-5-337](https://doi.org/10.1186/1756-0500-5-337) [Medline](#)
130. H. Li, R. Durbin, Fast and accurate short read alignment with Burrows-Wheeler transform. *Bioinformatics* **25**, 1754–1760 (2009). [doi:10.1093/bioinformatics/btp324](https://doi.org/10.1093/bioinformatics/btp324) [Medline](#)
131. M. Schubert, A. Ginolhac, S. Lindgreen, J. F. Thompson, K. A. S. Al-Rasheid, E. Willerslev, A. Krogh, L. Orlando, Improving ancient DNA read mapping against modern reference genomes. *BMC Genomics* **13**, 178 (2012). [doi:10.1186/1471-2164-13-178](https://doi.org/10.1186/1471-2164-13-178) [Medline](#)
132. M. Kircher, Analysis of high-throughput ancient DNA sequencing data. *Methods Mol. Biol.* **840**, 197–228 (2012). [doi:10.1007/978-1-61779-516-9\\_23](https://doi.org/10.1007/978-1-61779-516-9_23) [Medline](#)
133. R. E. Green, J. Krause, A. W. Briggs, T. Maricic, U. Stenzel, M. Kircher, N. Patterson, H. Li, W. Zhai, M. H. Y. Fritz, N. F. Hansen, E. Y. Durand, A. S. Malaspinas, J. D. Jensen, T. Marques-Bonet, C. Alkan, K. Prüfer, M. Meyer, H. A. Burbano, J. M. Good, R. Schultz, A. Aximu-Petri, A. Butthof, B. Höber, B. Höffner, M. Siegemund, A. Weihmann, C. Nusbaum, E. S. Lander, C. Russ, N. Novod, J. Affourtit, M. Egholm, C. Verna, P. Rudan, D. Brajkovic, Ž. Kucan, I. Gušić, V. B. Doronichev, L. V. Golovanova, C. Lalueza-Fox, M. de la Rasilla, J. Fortea, A. Rosas, R. W. Schmitz, P. L. F. Johnson, E. E. Eichler, D. Falush, E. Birney, J. C. Mullikin, M. Slatkin, R. Nielsen, J. Kelso, M. Lachmann, D. Reich, S. Pääbo, A draft sequence of the Neandertal genome. *Science* **328**, 710–722 (2010). [doi:10.1126/science.1188021](https://doi.org/10.1126/science.1188021) [Medline](#)
134. P. Skoglund, C. Posth, K. Sirak, M. Spriggs, F. Valentin, S. Bedford, G. R. Clark, C. Reepmeyer, F. Petchey, D. Fernandes, Q. Fu, E. Harney, M. Lipson, S. Mallick, M. Novak, N. Rohland, K. Stewardson, S. Abdullah, M. P. Cox, F. R. Friedlaender, J. S. Friedlaender, T. Kivisild, G. Koki, P. Kusuma, D. A. Merriwether, F.-X. Ricaut, J. T. S. Wee, N. Patterson, J. Krause, R. Pinhasi, D. Reich, Genomic insights into the peopling of the Southwest Pacific. *Nature* **538**, 510–513 (2016). [doi:10.1038/nature19844](https://doi.org/10.1038/nature19844) [Medline](#)
135. W. Haak, I. Lazaridis, N. Patterson, N. Rohland, S. Mallick, B. Llamas, G. Brandt, S. Nordenfelt, E. Harney, K. Stewardson, Q. Fu, A. Mittnik, E. Bánffy, C. Economou, M. Francken, S. Friederich, R. G. Pena, F. Hallgren, V. Khartanovich, A. Khokhlov, M. Kunst, P. Kuznetsov, H. Meller, O. Mochalov, V. Moiseyev, N. Nicklisch, S. L. Pichler, R. Risch,

- M. A. Rojo Guerra, C. Roth, A. Szécsényi-Nagy, J. Wahl, M. Meyer, J. Krause, D. Brown, D. Anthony, A. Cooper, K. W. Alt, D. Reich, Massive migration from the steppe was a source for Indo-European languages in Europe. *Nature* **522**, 207–211 (2015). [doi:10.1038/nature14317](https://doi.org/10.1038/nature14317) [Medline](#)
136. H. Jónsson, A. Ginolhac, M. Schubert, P. L. F. Johnson, L. Orlando, mapDamage2.0: Fast approximate Bayesian estimates of ancient DNA damage parameters. *Bioinformatics* **29**, 1682–1684 (2013). [doi:10.1093/bioinformatics/btt193](https://doi.org/10.1093/bioinformatics/btt193) [Medline](#)
137. B. Bai, W.-M. Zhao, B.-X. Tang, Y.-Q. Wang, L. Wang, Z. Zhang, H.-C. Yang, Y.-H. Liu, J.-W. Zhu, D. M. Irwin, G.-D. Wang, Y.-P. Zhang, DoGSD: The dog and wolf genome SNP database. *Nucleic Acids Res.* **43**, D777–D783 (2015). [doi:10.1093/nar/gku1174](https://doi.org/10.1093/nar/gku1174) [Medline](#)
138. A. R. Quinlan, I. M. Hall, BEDTools: A flexible suite of utilities for comparing genomic features. *Bioinformatics* **26**, 841–842 (2010). [doi:10.1093/bioinformatics/btq033](https://doi.org/10.1093/bioinformatics/btq033) [Medline](#)
139. P. Skoglund, E. Ersmark, E. Palkopoulou, L. Dalén, Ancient wolf genome reveals an early divergence of domestic dog ancestors and admixture into high-latitude breeds. *Curr. Biol.* **25**, 1515–1519 (2015). [doi:10.1016/j.cub.2015.04.019](https://doi.org/10.1016/j.cub.2015.04.019) [Medline](#)
140. H. Li, B. Handsaker, A. Wysoker, T. Fennell, J. Ruan, N. Homer, G. Marth, G. Abecasis, R. Durbin, 1000 Genome Project Data Processing Subgroup, The Sequence Alignment/Map format and SAMtools. *Bioinformatics* **25**, 2078–2079 (2009). [doi:10.1093/bioinformatics/btp352](https://doi.org/10.1093/bioinformatics/btp352)
141. O. Thalmann, B. Shapiro, P. Cui, V. J. Schuenemann, S. K. Sawyer, D. L. Greenfield, M. B. Germonpré, M. V. Sablin, F. López-Giráldez, X. Domingo-Roura, H. Napierala, H.-P. Uerpmann, D. M. Loponte, A. A. Acosta, L. Giemsch, R. W. Schmitz, B. Worthington, J. E. Buikstra, A. Druzhkova, A. S. Graphodatsky, N. D. Ovodov, N. Wahlberg, A. H. Freedman, R. M. Schweizer, K.-P. Koepfli, J. A. Leonard, M. Meyer, J. Krause, S. Pääbo, R. E. Green, R. K. Wayne, Complete mitochondrial genomes of ancient canids suggest a European origin of domestic dogs. *Science* **342**, 871–874 (2013). [doi:10.1126/science.1243650](https://doi.org/10.1126/science.1243650) [Medline](#)
142. K. Katoh, G. Asimenos, H. Toh, in *Bioinformatics for DNA Sequence Analysis*, D. Posada, Ed. (Methods in Molecular Biology, Humana Press), pp. 39–64.
143. K. Katoh, D. M. Standley, MAFFT multiple sequence alignment software version 7: Improvements in performance and usability. *Mol. Biol. Evol.* **30**, 772–780 (2013). [doi:10.1093/molbev/mst010](https://doi.org/10.1093/molbev/mst010) [Medline](#)
144. A. Stamatakis, RAxML-VI-HPC: Maximum likelihood-based phylogenetic analyses with thousands of taxa and mixed models. *Bioinformatics* **22**, 2688–2690 (2006). [doi:10.1093/bioinformatics/btl446](https://doi.org/10.1093/bioinformatics/btl446) [Medline](#)
145. J.-F. Pang, C. Kluetsch, X.-J. Zou, A. B. Zhang, L.-Y. Luo, H. Angleby, A. Ardalan, C. Ekström, A. Sköllermo, J. Lundeberg, S. Matsumura, T. Leitner, Y.-P. Zhang, P. Savolainen, mtDNA data indicate a single origin for dogs south of Yangtze River, less than 16,300 years ago, from numerous wolves. *Mol. Biol. Evol.* **26**, 2849–2864 (2009). [doi:10.1093/molbev/msp195](https://doi.org/10.1093/molbev/msp195) [Medline](#)
146. S. Björnerfeldt, M. T. Webster, C. Vilà, Relaxation of selective constraint on dog mitochondrial DNA following domestication. *Genome Res.* **16**, 990–994 (2006). [doi:10.1101/gr.5117706](https://doi.org/10.1101/gr.5117706)
147. Z. Hao, Q. Zhang, B. Qu, The complete mitochondrial genome of the Chinese indigenous dog. *Mitochondrial DNA A DNA Mapp. Seq. Anal.* **27**, 88–89 (2016). [doi:10.3109/19401736.2013.873916](https://doi.org/10.3109/19401736.2013.873916) [Medline](#)

148. K. M. Webb, M. W. Allard, Mitochondrial genome DNA analysis of the domestic dog: Identifying informative SNPs outside of the control region. *J. Forensic Sci.* **54**, 275–288 (2009). [doi:10.1111/j.1556-4029.2008.00952.x](https://doi.org/10.1111/j.1556-4029.2008.00952.x) [Medline](#)
149. J.-H. Zhao, W. Liu, The complete mitochondrial genome of the Simao Chinese indigenous dog. *Mitochondrial DNA A DNA Mapp. Seq. Anal.* **27**, 545–546 (2016). [doi:10.3109/19401736.2014.905850](https://doi.org/10.3109/19401736.2014.905850) [Medline](#)
150. M. W. Pedersen, A. Ruter, C. Schweger, H. Friebe, R. A. Staff, K. K. Kjeldsen, M. L. Z. Mendoza, A. B. Beaudoin, C. Zutter, N. K. Larsen, B. A. Potter, R. Nielsen, R. A. Rainville, L. Orlando, D. J. Meltzer, K. H. Kjær, E. Willerslev, Postglacial viability and colonization in North America’s ice-free corridor. *Nature* **537**, 45–49 (2016). [doi:10.1038/nature19085](https://doi.org/10.1038/nature19085) [Medline](#)
151. A. J. Drummond, M. A. Suchard, D. Xie, A. Rambaut, Bayesian phylogenetics with BEAUti and the BEAST 1.7. *Mol. Biol. Evol.* **29**, 1969–1973 (2012). [doi:10.1093/molbev/mss075](https://doi.org/10.1093/molbev/mss075) [Medline](#)
152. R. Lanfear, P. B. Frandsen, A. M. Wright, T. Senfeld, B. Calcott, PartitionFinder 2: New methods for selecting partitioned models of evolution for molecular and morphological phylogenetic analyses. *Mol. Biol. Evol.* **34**, 772–773 (2017). [Medline](#)
153. A. J. Drummond, A. Rambaut, B. Shapiro, O. G. Pybus, Bayesian coalescent inference of past population dynamics from molecular sequences. *Mol. Biol. Evol.* **22**, 1185–1192 (2005). [doi:10.1093/molbev/msi103](https://doi.org/10.1093/molbev/msi103) [Medline](#)
154. C. Drögemüller, E. K. Karlsson, M. K. Hytönen, M. Perloski, G. Dolf, K. Sainio, H. Lohi, K. Lindblad-Toh, T. Leeb, A mutation in hairless dogs implicates FOXI3 in ectodermal development. *Science* **321**, 1462 (2008). [doi:10.1126/science.1162525](https://doi.org/10.1126/science.1162525) [Medline](#)
155. N. Patterson, A. L. Price, D. Reich, Population structure and eigenanalysis. *PLOS Genet.* **2**, e190 (2006). [doi:10.1371/journal.pgen.0020190](https://doi.org/10.1371/journal.pgen.0020190) [Medline](#)
156. S. Purcell, B. Neale, K. Todd-Brown, L. Thomas, M. A. R. Ferreira, D. Bender, J. Maller, P. Sklar, P. I. W. de Bakker, M. J. Daly, P. C. Sham, PLINK: A tool set for whole-genome association and population-based linkage analyses. *Am. J. Hum. Genet.* **81**, 559–575 (2007). [doi:10.1086/519795](https://doi.org/10.1086/519795) [Medline](#)
157. E. Paradis, J. Claude, K. Strimmer, APE: Analyses of phylogenetics and evolution in R language. *Bioinformatics* **20**, 289–290 (2004). [doi:10.1093/bioinformatics/btg412](https://doi.org/10.1093/bioinformatics/btg412) [Medline](#)
158. F. Ronquist, J. P. Huelsenbeck, MrBayes 3: Bayesian phylogenetic inference under mixed models. *Bioinformatics* **19**, 1572–1574 (2003). [doi:10.1093/bioinformatics/btg180](https://doi.org/10.1093/bioinformatics/btg180) [Medline](#)
159. H. E. L. Lischer, L. Excoffier, PGDSpider: An automated data conversion tool for connecting population genetics and genomics programs. *Bioinformatics* **28**, 298–299 (2012). [doi:10.1093/bioinformatics/btr642](https://doi.org/10.1093/bioinformatics/btr642) [Medline](#)
160. P. O. Lewis, A likelihood approach to estimating phylogeny from discrete morphological character data. *Syst. Biol.* **50**, 913–925 (2001). [doi:10.1080/106351501753462876](https://doi.org/10.1080/106351501753462876) [Medline](#)
161. N. Patterson, P. Moorjani, Y. Luo, S. Mallick, N. Rohland, Y. Zhan, T. Genschoreck, T. Webster, D. Reich, Ancient admixture in human history. *Genetics* **192**, 1065–1093 (2012). [doi:10.1534/genetics.112.145037](https://doi.org/10.1534/genetics.112.145037) [Medline](#)
162. D. Reich, K. Thangaraj, N. Patterson, A. L. Price, L. Singh, Reconstructing Indian population history. *Nature* **461**, 489–494 (2009). [doi:10.1038/nature08365](https://doi.org/10.1038/nature08365) [Medline](#)
163. D. H. Alexander, J. Novembre, K. Lange, Fast model-based estimation of ancestry in unrelated individuals. *Genome Res.* **19**, 1655–1664 (2009). [doi:10.1101/gr.094052.109](https://doi.org/10.1101/gr.094052.109) [Medline](#)

164. G. Larson, E. K. Karlsson, A. Perri, M. T. Webster, S. Y. W. Ho, J. Peters, P. W. Stahl, P. J. Piper, F. Lingaas, M. Fredholm, K. E. Comstock, J. F. Modiano, C. Schelling, A. I. Agoulnik, P. A. Leegwater, K. Dobney, J.-D. Vigne, C. Vilà, L. Andersson, K. Lindblad-Toh, Rethinking dog domestication by integrating genetics, archeology, and biogeography. *Proc. Natl. Acad. Sci. U.S.A.* **109**, 8878–8883 (2012). [doi:10.1073/pnas.1203005109](https://doi.org/10.1073/pnas.1203005109)
165. A. Eriksson, A. Manica, Effect of ancient population structure on the degree of polymorphism shared between modern human populations and ancient hominins. *Proc. Natl. Acad. Sci. U.S.A.* **109**, 13956–13960 (2012). [doi:10.1073/pnas.1200567109](https://doi.org/10.1073/pnas.1200567109) [Medline](#)
166. C. Murgia, J. K. Pritchard, S. Y. Kim, A. Fassati, R. A. Weiss, Clonal origin and evolution of a transmissible cancer. *Cell* **126**, 477–487 (2006). [doi:10.1016/j.cell.2006.05.051](https://doi.org/10.1016/j.cell.2006.05.051) [Medline](#)
167. C. A. Rebbeck, R. Thomas, M. Breen, A. M. Leroi, A. Burt, Origins and evolution of a transmissible cancer. *Evolution* **63**, 2340–2349 (2009). [doi:10.1111/j.1558-5646.2009.00724.x](https://doi.org/10.1111/j.1558-5646.2009.00724.x) [Medline](#)
168. A. Rimmer, H. Phan, I. Mathieson, Z. Iqbal, S. R. F. Twigg, A. O. M. Wilkie, G. McVean, G. Lunter, WGS500 Consortium, Integrating mapping-, assembly- and haplotype-based approaches for calling variants in clinical sequencing applications. *Nat. Genet.* **46**, 912–918 (2014). [doi:10.1038/ng.3036](https://doi.org/10.1038/ng.3036) [Medline](#)
169. A. McKenna, M. Hanna, E. Banks, A. Sivachenko, K. Cibulskis, A. Kernytsky, K. Garimella, D. Altshuler, S. Gabriel, M. Daly, M. A. DePristo, The Genome Analysis Toolkit: A MapReduce framework for analyzing next-generation DNA sequencing data. *Genome Res.* **20**, 1297–1303 (2010). [doi:10.1101/gr.107524.110](https://doi.org/10.1101/gr.107524.110) [Medline](#)
170. B. Decker, B. W. Davis, M. Rimbault, A. H. Long, E. Karlins, V. Jagannathan, R. Reiman, H. G. Parker, C. Drögemüller, J. J. Corneveaux, E. S. Chapman, J. M. Trent, T. Leeb, M. J. Huentelman, R. K. Wayne, D. M. Karyadi, E. A. Ostrander, Comparison against 186 canid whole-genome sequences reveals survival strategies of an ancient clonally transmissible canine tumor. *Genome Res.* **25**, 1646–1655 (2015). [doi:10.1101/gr.190314.115](https://doi.org/10.1101/gr.190314.115) [Medline](#)
171. A. Vaysse, A. Ratnakumar, T. Derrien, E. Axelsson, G. Rosengren Pielberg, S. Sigurdsson, T. Fall, E. H. Seppälä, M. S. T. Hansen, C. T. Lawley, E. K. Karlsson, D. Bannasch, C. Vilà, H. Lohi, F. Galibert, M. Fredholm, J. Häggström, A. Hedhammar, C. André, K. Lindblad-Toh, C. Hitte, M. T. Webster, LUPA Consortium, Identification of genomic regions associated with phenotypic variation between dog breeds using selection mapping. *PLOS Genet.* **7**, e1002316 (2011). [doi:10.1371/journal.pgen.1002316](https://doi.org/10.1371/journal.pgen.1002316) [Medline](#)
172. K. Lindblad-Toh, C. M. Wade, T. S. Mikkelsen, E. K. Karlsson, D. B. Jaffe, M. Kamal, M. Clamp, J. L. Chang, E. J. Kulbokas 3rd, M. C. Zody, E. Mauceli, X. Xie, M. Breen, R. K. Wayne, E. A. Ostrander, C. P. Ponting, F. Galibert, D. R. Smith, P. J. DeJong, E. Kirkness, P. Alvarez, T. Biagi, W. Brockman, J. Butler, C.-W. Chin, A. Cook, J. Cuff, M. J. Daly, D. DeCaprio, S. Gnerre, M. Grabherr, M. Kellis, M. Kleber, C. Bardeleben, L. Goodstadt, A. Heger, C. Hitte, L. Kim, K.-P. Koepfli, H. G. Parker, J. P. Pollinger, S. M. J. Searle, N. B. Sutter, R. Thomas, C. Webber, J. Baldwin, A. Abebe, A. Abouelleil, L. Aftuck, M. Ait-Zahra, T. Aldredge, N. Allen, P. An, S. Anderson, C. Antoine, H. Arachchi, A. Aslam, L. Ayotte, P. Bachantsang, A. Barry, T. Bayul, M. Benamara, A. Berlin, D. Bessette, B. Blitshteyn, T. Bloom, J. Blye, L. Boguslavskiy, C. Bonnet, B. Boukhgalter, A. Brown, P. Cahill, N. Calixte, J. Camarata, Y. Cheshatsang, J. Chu, M. Citroen, A. Collymore, P. Cooke, T. Dawoe, R. Daza, K. Decktor, S. DeGray, N. Dhargay, K. Dooley, K. Dooley, P. Dorje, K. Dorjee, L. Dorris, N. Duffey, A. Dupes, O. Egbiremolen, R. Elong, J. Falk, A. Farina, S. Faro, D. Ferguson, P. Ferreira, S. Fisher, M. FitzGerald, K. Foley, C. Foley, A. Franke, D. Friedrich, D. Gage, M. Garber, G. Gearin, G. Giannoukos, T. Goode, A. Goyette, J. Graham, E. Grandbois, K. Gyaltsen, N. Hafez, D. Hagopian, B. Hagos, J. Hall, C. Healy, R. Hegarty, T. Honan, A. Horn, N. Houde, L. Hughes, L. Hunnicutt, M. Husby, B. Jester, C.

Jones, A. Kamat, B. Kanga, C. Kells, D. Khazanovich, A. C. Kieu, P. Kisner, M. Kumar, K. Lance, T. Landers, M. Lara, W. Lee, J. P. Leger, N. Lennon, L. Leuper, S. LeVine, J. Liu, X. Liu, Y. Lokyitsang, T. Lokyitsang, A. Lui, J. Macdonald, J. Major, R. Marabella, K. Maru, C. Matthews, S. McDonough, T. Mehta, J. Meldrim, A. Melnikov, L. Meneus, A. Mihalev, T. Mihova, K. Miller, R. Mittelman, V. Mlenga, L. Mulrain, G. Munson, A. Navidi, J. Naylor, T. Nguyen, N. Nguyen, C. Nguyen, T. Nguyen, R. Nicol, N. Norbu, C. Norbu, N. Novod, T. Nyima, P. Olandt, B. O'Neill, K. O'Neill, S. Osman, L. Oyono, C. Patti, D. Perrin, P. Phunkhang, F. Pierre, M. Priest, A. Rachupka, S. Raghuraman, R. Rameau, V. Ray, C. Raymond, F. Rege, C. Rise, J. Rogers, P. Rogov, J. Sahalie, S. Settipalli, T. Sharpe, T. Shea, M. Sheehan, N. Sherpa, J. Shi, D. Shih, J. Sloan, C. Smith, T. Sparrow, J. Stalker, N. Stange-Thomann, S. Stavropoulos, C. Stone, S. Stone, S. Sykes, P. Tchuinga, P. Tenzing, S. Tesfaye, D. Thoulutsang, Y. Thoulutsang, K. Topham, I. Topping, T. Tsamla, H. Vassiliev, V. Venkataraman, A. Vo, T. Wangchuk, T. Wangdi, M. Weiland, J. Wilkinson, A. Wilson, S. Yadav, S. Yang, X. Yang, G. Young, Q. Yu, J. Zainoun, L. Zembek, A. Zimmer, E. S. Lander, Genome sequence, comparative analysis and haplotype structure of the domestic dog. *Nature* **438**, 803–819 (2005). [doi:10.1038/nature04338](https://doi.org/10.1038/nature04338)  
[Medline](#)

173. G. Ha, A. Roth, D. Lai, A. Bashashati, J. Ding, R. Goya, R. Giuliany, J. Rosner, A. Oloumi, K. Shumansky, S.-F. Chin, G. Turashvili, M. Hirst, C. Caldas, M. A. Marra, S. Aparicio, S. P. Shah, Integrative analysis of genome-wide loss of heterozygosity and monoallelic expression at nucleotide resolution reveals disrupted pathways in triple-negative breast cancer. *Genome Res.* **22**, 1995–2007 (2012). [doi:10.1101/gr.137570.112](https://doi.org/10.1101/gr.137570.112) [Medline](#)
174. C. Fraley, A. E. Raftery, T. B. Murphy, L. Scrucca, “mclust version 4 for R: Normal mixture modeling for model-based clustering, classification, and density estimation” (Tech. Rep. 597, Department of Statistics, University of Washington, 2012).
175. P. Concannon, S. Whaley, D. Lein, R. Wissler, Canine gestation length: Variation related to time of mating and fertile life of sperm. *Am. J. Vet. Res.* **44**, 1819–1821 (1983). [Medline](#)
176. A. C. Okkens, T. W. Hekerman, J. W. de Vogel, B. van Haaften, Influence of litter size and breed on variation in length of gestation in the dog. *Vet. Q.* **15**, 160–161 (1993). [doi:10.1080/01652176.1993.9694397](https://doi.org/10.1080/01652176.1993.9694397) [Medline](#)
177. B. B. Gavrilovic, K. Andersson, C. Linde Forsberg, Reproductive patterns in the domestic dog—a retrospective study of the Drever breed. *Theriogenology* **70**, 783–794 (2008). [doi:10.1016/j.theriogenology.2008.04.051](https://doi.org/10.1016/j.theriogenology.2008.04.051) [Medline](#)
178. L. B. Alexandrov, P. H. Jones, D. C. Wedge, J. E. Sale, P. J. Campbell, S. Nik-Zainal, M. R. Stratton, Clock-like mutational processes in human somatic cells. *Nat. Genet.* **47**, 1402–1407 (2015). [doi:10.1038/ng.3441](https://doi.org/10.1038/ng.3441) [Medline](#)
179. D. P. Blaine, *A Domestic Treatise on the Diseases of Horses and Dogs* (T. Boosey, 1810).
180. S. M. Waszak, G. Tiao, B. Zhu, T. Rausch, F. Muyas, B. Rodriguez-Martin, R. Rabionet, S. Yakneen, G. Escaramis, Y. Li, N. Saini, S. A. Roberts, G. M. Demidov, E. Pitkanen, O. Delaneau, J. M. Heredia-Genestar, J. Weischenfeldt, S. S. Shringarpure, J. Chen, H. Nakagawa, L. B. Alexandrov, O. Drechsel, L. J. Dursi, A. V. Segre, E. Garrison, S. Erkek, N. Habermann, L. Urban, E. Khurana, A. Cafferkey, S. Hayashi, S. Imoto, L. A. Aaltonen, E. G. Alvarez, A. Baez-Ortega, M. Bailey, M. Bosio, A. L. Bruzos, I. Buchhalter, C. D. Bustamante, C. Calabrese, A. DiBiase, M. Gerstein, A. Z. Holik, X. Hua, K. Huang, I. Letunic, L. J. Klimczak, R. Koster, S. Kumar, M. McLellan, J. Mashl, L. Mirabello, S. Newhouse, A. Prasad, G. Raetsch, M. Schlesner, R. Schwarz, P. Sharma, T. Shmaya, N. Sidiropoulos, L. Song, H. Susak, T. Tanskanen, M. Tojo, D. C. Wedge, M. Wright, Y. Wu, K. Ye, V. D. Yellapantula, J. Zamora, A. J. Butte, G. Getz, J. Simpson, L. Ding, T. Marques-Bonet, A. Navarro, A. Brazma, P. Campbell, S. J. Chanock, N. Chatterjee, O.



Stegle, R. Siebert, S. Ossowski, O. Harismendy, D. A. Gordenin, J. M. C. Tubio, F. M. De La Vega, D. F. Easton, X. Estivill, J. Korbel, PCAWG Germline Working Group, ICGC/TCGA Pan-Cancer Analysis of Whole Genomes Net, Germline determinants of the somatic mutation landscape in 2,642 cancer genomes. bioRxiv 208330 [Preprint]. 1 November 2017. <https://doi.org/10.1101/208330>
